# Supplementary material for: Drosophila models of PIGA-CDG mirror patient phenotypes
Source: bioRxiv preprint, doi:10.1101/2023.10.27.564441, version 1 (2023-10-27)
Supplement: Table S1 [file 564441_file10.xlsx]

## Sheet: neuron KD
RNAseq data for PIG-A neuron-specific KD
FBgn	flybase symbol	baseMean	log2FoldChange	lfcSE	stat	pvalue	padj
FBgn0000003	7SLRNA:CR32864	447.353	-0.493613	0.255385	-1.93282	0.0532584	0.370258
FBgn0000008	a	1047.76	0.0907661	0.127573	0.711484	0.476784	0.870968
FBgn0000015	Abd-B	0.323626	-0.0425558	4.05619	-0.0104916	0.991629	NA
FBgn0000017	Abl	4538.99	-0.0126813	0.089167	-0.142219	0.886907	0.987131
FBgn0000018	abo	206.768	0.0292532	0.163047	0.179416	0.857611	0.980679
FBgn0000024	Ace	6819.63	0.00950245	0.0931314	0.102033	0.918731	0.990878
FBgn0000028	acj6	466.749	-0.14017	0.172003	-0.814925	0.415115	0.837034
FBgn0000032	Acph-1	401.063	0.0262495	0.132774	0.1977	0.84328	0.978045
FBgn0000036	nAChRalpha1	1419.48	-0.00138337	0.141554	-0.00977274	0.992203	0.998777
FBgn0000037	mAChR-A	2590.06	-0.0315281	0.0822069	-0.383522	0.701333	0.94548
FBgn0000038	nAChRbeta1	10577.8	-0.0426179	0.0984343	-0.432957	0.665046	0.937084
FBgn0000039	nAChRalpha2	1088.32	-0.038446	0.154584	-0.248706	0.803589	0.970132
FBgn0000042	Act5C	22016.1	0.0485726	0.0730524	0.6649	0.506114	0.882692
FBgn0000043	Act42A	696.147	0.404951	0.230839	1.75426	0.079386	0.445133
FBgn0000044	Act57B	29268.8	1.24247	0.773637	1.60601	0.108271	0.507834
FBgn0000045	Act79B	876.534	1.0021	0.237784	4.21433	2.50519e-05	0.00211506
FBgn0000046	Act87E	2642.45	0.562797	0.475387	1.18387	0.236465	0.704683
FBgn0000047	Act88F	25	1.83918	0.877842	2.09512	0.0361607	0.304314
FBgn0000052	Pfas	3236.59	0.983652	0.258833	3.80034	0.000144498	0.00792014
FBgn0000053	Gart	4636.28	1.40299	0.482592	2.90721	0.00364672	0.0805432
FBgn0000055	Adh	72.3124	1.36892	0.557101	2.45723	0.0140014	0.182541
FBgn0000057	adp	1038.86	0.118207	0.132607	0.891412	0.372708	0.807913
FBgn0000061	al	10.6297	-0.0356627	0.873101	-0.0408461	0.967419	0.997029
FBgn0000063	Mps1	47.6979	0.0412235	0.446208	0.0923863	0.926391	0.993467
FBgn0000064	Ald1	39567	0.489858	0.151634	3.23054	0.00123558	0.0379335
FBgn0000071	Ama	6.89263	0.955355	0.860041	1.11082	0.266644	0.735415
FBgn0000075	amd	313.148	0.121062	0.280508	0.431582	0.666045	0.937084
FBgn0000077	amx	315.644	0.00164701	0.13724	0.0120009	0.990425	0.998774
FBgn0000078	Amy-d	1318.85	1.32619	0.533844	2.48422	0.0129836	0.176069
FBgn0000079	Amy-p	1004.8	1.41319	0.582169	2.42746	0.0152049	0.191783
FBgn0000083	AnxB9	5326.95	0.094344	0.0991696	0.95134	0.341432	0.790283
FBgn0000084	AnxB10	4040.77	0.178312	0.107485	1.65895	0.0971254	0.486976
FBgn0000092	CG2650	65.1498	0.732326	0.55761	1.31333	0.189072	0.643707
FBgn0000097	aop	1720.94	0.0169876	0.0968165	0.175462	0.860717	0.981467
FBgn0000100	RpLP0	36798.9	-0.13476	0.148572	-0.907034	0.364389	0.806311
FBgn0000108	Appl	21570.6	-0.0674076	0.0845665	-0.797095	0.425396	0.842959
FBgn0000109	Aprt	288.943	0.412174	0.147259	2.79896	0.00512668	0.101845
FBgn0000114	bru1	2017.54	0.187205	0.135311	1.38352	0.166506	0.610561
FBgn0000115	Arl1	610.692	0.259047	0.164454	1.57519	0.115212	0.527396
FBgn0000116	Argk	46920.3	0.289699	0.190807	1.51828	0.128944	0.555368
FBgn0000117	arm	10302	0.0629556	0.0828091	0.760251	0.447105	0.857489
FBgn0000119	arr	1496.75	0.0280684	0.105406	0.266288	0.790018	0.966279
FBgn0000120	Arr1	178588	-0.413552	0.142502	-2.90207	0.00370711	0.0813621
FBgn0000121	Arr2	281344	-0.371501	0.180487	-2.05833	0.0395582	0.320538
FBgn0000137	ase	0.787923	-0.463556	2.59088	-0.178918	0.858002	NA
FBgn0000139	ash2	982.172	-0.182309	0.140943	-1.29349	0.195842	0.650674
FBgn0000140	asp	6.95105	-0.620584	0.829623	-0.748032	0.454441	0.860305
FBgn0000146	aub	20.4536	-0.512936	0.603809	-0.8495	0.395603	0.824071
FBgn0000147	aurA	29.7617	-0.429363	0.387235	-1.10879	0.26752	0.737199
FBgn0000150	awd	11770.8	0.23025	0.120554	1.90993	0.0561421	0.377893
FBgn0000152	Axs	205.924	0.166222	0.316335	0.525461	0.599263	0.918446
FBgn0000153	b	932.597	-0.181821	0.175052	-1.03867	0.298957	0.760065
FBgn0000157	Dll	434.947	0.107665	0.124841	0.862422	0.388455	0.817643
FBgn0000158	bam	0.320885	-0.0425559	4.06807	-0.010461	0.991654	NA
FBgn0000163	baz	2184.76	-0.0580697	0.113134	-0.513282	0.607754	0.919223
FBgn0000166	bcd	38.1446	-0.4584	0.32199	-1.42365	0.154549	0.59547
FBgn0000173	ben	4117.67	0.0378058	0.148577	0.254453	0.799146	0.969102
FBgn0000179	bi	709.721	-0.0349098	0.119341	-0.292521	0.769888	0.963216
FBgn0000180	bib	160.269	-0.089669	0.207393	-0.432363	0.665478	0.937084
FBgn0000181	bic	12904.3	0.0165227	0.12262	0.134747	0.892812	0.988009
FBgn0000183	BicD	2681.45	-0.036977	0.0872667	-0.423725	0.671767	0.939497
FBgn0000206	boss	5589.26	0.17535	0.174376	1.00559	0.314614	0.771197
FBgn0000212	brm	2690.46	0.0193047	0.0950674	0.203063	0.839086	0.977031
FBgn0000221	brn	94.1038	-0.162222	0.264484	-0.613353	0.539643	0.895755
FBgn0000228	Bsg25D	1843.32	-0.0601584	0.100896	-0.59624	0.551015	0.899512
FBgn0000229	bsk	3045.84	0.0129088	0.128098	0.100773	0.919731	0.991317
FBgn0000233	btd	17.2747	-0.562067	0.538682	-1.04341	0.296757	0.758133
FBgn0000239	bur	3152.64	-0.131932	0.148853	-0.88633	0.37544	0.809574
FBgn0000241	bw	814.021	0.317409	0.148785	2.13335	0.0328961	0.287809
FBgn0000244	by	4236.09	-0.136501	0.0942979	-1.44755	0.147743	0.586504
FBgn0000246	c(3)G	136.03	-0.232786	0.189105	-1.23099	0.218327	0.682733
FBgn0000247	ca	2638.64	0.0534323	0.10201	0.523796	0.60042	0.918454
FBgn0000250	cact	4179.08	-0.0428643	0.0827633	-0.517915	0.604518	0.918597
FBgn0000251	cad	0.749991	-3.06969	2.96929	-1.03381	0.301224	NA
FBgn0000253	Cam	55861.1	0.123809	0.16295	0.759794	0.447377	0.857489
FBgn0000256	capu	3523.99	0.0664749	0.0931464	0.713661	0.475437	0.869914
FBgn0000257	car	701.257	-0.0201013	0.11384	-0.176576	0.859842	0.981178
FBgn0000259	CkIIbeta	3162.02	-0.0752876	0.1084	-0.694535	0.487347	0.874834
FBgn0000261	Cat	11935.9	0.300304	0.133612	2.24758	0.0246029	0.246005
FBgn0000273	Pka-C1	8444.8	0.0963083	0.0994004	0.968893	0.332599	0.783347
FBgn0000274	Pka-C2	0.300546	-1.76981	4.04919	-0.437078	0.662055	NA
FBgn0000276	CecA1	9.60559	-1.67163	0.926792	-1.80368	0.0712819	0.424488
FBgn0000277	CecA2	12.9364	-1.86129	1.1482	-1.62104	0.105008	0.502999
FBgn0000279	CecC	16.1619	-2.52786	1.25113	-2.02046	0.0433352	0.335808
FBgn0000281	Cec2	2.98113	1.03769	1.55021	0.669387	0.503248	NA
FBgn0000283	Cp190	3018.6	-0.0710075	0.118593	-0.598749	0.54934	0.898225
FBgn0000286	Cf2	2517.92	0.0193036	0.115452	0.1672	0.867213	0.983432
FBgn0000287	salr	807.489	-0.187734	0.123985	-1.51417	0.129984	0.557104
FBgn0000289	cg	4913.72	-0.0772015	0.0863335	-0.894224	0.371202	0.807726
FBgn0000299	Col4a1	11907.6	0.909774	0.482785	1.88443	0.0595072	0.388911
FBgn0000303	ChAT	2392.33	0.117956	0.174877	0.67451	0.499987	0.879536
FBgn0000307	chif	2507.26	-0.0347588	0.090966	-0.382107	0.702382	0.94548
FBgn0000308	chic	6092.95	-0.0702976	0.128167	-0.548482	0.583361	0.911491
FBgn0000316	cin	1130.84	0.0587248	0.0946365	0.620531	0.534908	0.892708
FBgn0000317	ck	1763.09	0.219971	0.119929	1.83417	0.0666284	0.411767
FBgn0000318	cl	1351.86	0.114376	0.100128	1.14231	0.253327	0.724811
FBgn0000319	Chc	12480.2	0.0355366	0.10366	0.342818	0.731736	0.953655
FBgn0000320	eya	1288.48	0.0779409	0.112304	0.694018	0.487671	0.874918
FBgn0000326	clt	669.69	0.18491	0.127772	1.44719	0.147845	0.586504
FBgn0000330	cm	802.676	0.128813	0.113045	1.13948	0.254502	0.725793
FBgn0000337	cn	0.964937	-0.923232	2.56099	-0.360498	0.718475	NA
FBgn0000339	cni	770.154	-0.147225	0.119465	-1.23237	0.217809	0.682494
FBgn0000346	comt	8732.75	0.0569015	0.130603	0.435681	0.663068	0.936589
FBgn0000351	cort	19.2608	-0.830042	0.472911	-1.75518	0.0792289	0.444983
FBgn0000352	cos	1103.7	0.0238482	0.130511	0.182729	0.855011	0.979333
FBgn0000357	Cp18	14.7049	-0.206503	0.530889	-0.388975	0.697295	0.94548
FBgn0000358	Cp19	3.59549	1.47115	1.29213	1.13855	0.254892	NA
FBgn0000359	Cp36	0.622729	1.39286	2.75881	0.504879	0.613644	NA
FBgn0000360	Cp38	0.383707	-0.0425546	3.82795	-0.0111168	0.99113	NA
FBgn0000370	crc	6973.88	-0.206853	0.134235	-1.54098	0.123322	0.544521
FBgn0000376	crm	760.858	-0.0216359	0.137843	-0.156961	0.875276	0.984102
FBgn0000377	crn	819.459	-0.00830907	0.107333	-0.0774137	0.938294	0.993729
FBgn0000382	csw	10060.2	-0.0730823	0.0998692	-0.731779	0.464303	0.865683
FBgn0000384	cta	737.303	-0.327106	0.151064	-2.16535	0.0303609	0.27663
FBgn0000394	cv	885.653	0.141776	0.160197	0.88501	0.376151	0.810106
FBgn0000395	cv-2	681.328	-0.0616614	0.132426	-0.46563	0.64148	0.929375
FBgn0000404	CycA	47.8928	-0.0747034	0.320286	-0.23324	0.815575	0.9714
FBgn0000405	CycB	22.2722	-0.601435	0.448504	-1.34098	0.179926	0.632327
FBgn0000406	Cyt-b5-r	29875.7	0.55101	0.201563	2.73368	0.00626306	0.114429
FBgn0000411	D	411.582	-0.213051	0.149388	-1.42616	0.153821	0.594705
FBgn0000412	D1	2323.18	-0.101785	0.125786	-0.80919	0.418406	0.840492
FBgn0000414	Dab	8547.13	0.0983793	0.0895673	1.09838	0.272037	0.740611
FBgn0000416	Sap-r	34282.2	0.058466	0.118524	0.493282	0.621813	0.923535
FBgn0000422	Ddc	7724.77	-0.164152	0.098731	-1.66262	0.0963884	0.485598
FBgn0000426	SmF	91.2984	-0.100812	0.234451	-0.429992	0.667201	0.937388
FBgn0000439	Dfd	1168.59	0.103695	0.119772	0.865775	0.386614	0.816776
FBgn0000442	Pkg21D	21.818	0.179023	0.430173	0.416166	0.677289	0.942014
FBgn0000447	Dhod	792.468	-0.181484	0.160628	-1.12984	0.258543	0.729153
FBgn0000448	Hr3	331.917	-0.273928	0.133381	-2.05373	0.0400018	0.322883
FBgn0000451	ect	99.8916	1.15049	0.53991	2.13089	0.0330981	0.288988
FBgn0000454	Dip-B	2641.41	0.075918	0.106993	0.709558	0.477978	0.871133
FBgn0000455	Dip-C	955.179	0.178115	0.127323	1.39892	0.161837	0.605661
FBgn0000459	disco	1279.83	0.0231693	0.257572	0.0899526	0.928325	0.993467
FBgn0000463	Dl	295.645	0.0797656	0.204186	0.390652	0.696054	0.94548
FBgn0000464	Lar	350.218	-0.138596	0.189156	-0.732706	0.463738	0.865683
FBgn0000473	Cyp6a2	1144.63	-0.618407	0.126641	-4.88317	1.04395e-06	0.000162447
FBgn0000477	DNaseII	2791.26	0.728311	0.258521	2.81722	0.00484407	0.0973878
FBgn0000479	dnc	6353.37	-0.0240656	0.112262	-0.214369	0.830259	0.975531
FBgn0000482	dor	617.398	-0.00842898	0.116861	-0.0721283	0.9425	0.994273
FBgn0000489	Pka-C3	2201.87	-0.0388883	0.0975121	-0.398805	0.690037	0.94548
FBgn0000490	dpp	787.358	0.210101	0.136673	1.53726	0.12423	0.545687
FBgn0000492	Dr	312.308	0.446213	0.32131	1.38873	0.164914	0.608561
FBgn0000499	dsh	1100.42	-0.115146	0.117923	-0.976451	0.328841	0.781545
FBgn0000500	Dsk	1428.73	-0.294018	0.244444	-1.20281	0.229051	0.69667
FBgn0000504	dsx	1102.89	-0.385871	0.0945099	-4.08287	4.44835e-05	0.00327956
FBgn0000520	dwg	418.608	-0.215719	0.168232	-1.28227	0.199748	0.656772
FBgn0000524	dx	377.437	-0.0691281	0.15107	-0.457589	0.647248	0.931395
FBgn0000527	e	1179.35	0.68557	0.274562	2.49696	0.0125263	0.172716
FBgn0000529	bsh	207.935	-0.313526	0.198487	-1.57958	0.114203	0.523696
FBgn0000533	ea	740.054	-0.0292289	0.136791	-0.213675	0.8308	0.975583
FBgn0000535	eag	3530.18	-0.0763393	0.0779293	-0.979597	0.327285	0.780846
FBgn0000536	eas	6512.98	-0.0470089	0.152113	-0.309039	0.757292	0.960981
FBgn0000541	E(bx)	5686.49	-0.0959916	0.108877	-0.88165	0.377966	0.811384
FBgn0000542	ec	345.485	0.335749	0.321455	1.04446	0.296271	0.758133
FBgn0000543	ecd	778.319	-0.00213936	0.104911	-0.0203921	0.983731	0.998567
FBgn0000546	EcR	1918.7	-0.00665424	0.0953115	-0.0698157	0.94434	0.994297
FBgn0000547	ed	3123.44	0.158535	0.152915	1.03675	0.299852	0.760444
FBgn0000551	Edg78E	35.9175	-0.125169	0.370752	-0.337608	0.735658	0.954401
FBgn0000552	Edg84A	1.42228	1.03154	1.67094	0.617341	0.53701	NA
FBgn0000557	eEF1alpha2	18635.6	-0.102024	0.0813696	-1.25383	0.209904	0.673622
FBgn0000559	eEF2	131636	-0.113255	0.124232	-0.911636	0.361961	0.805052
FBgn0000560	eg	18.7261	-0.0804296	0.493607	-0.162943	0.870564	0.984028
FBgn0000562	egl	2864.62	-0.0447102	0.0956763	-0.467307	0.64028	0.929375
FBgn0000564	Eh	28.361	5.49704	3.10203	1.77208	0.0763816	0.437573
FBgn0000565	Eip71CD	1505.65	0.0838587	0.136145	0.615952	0.537926	0.894749
FBgn0000566	Eip55E	1541.04	0.0426073	0.171411	0.248568	0.803695	0.970132
FBgn0000567	Eip74EF	1269.52	-0.059946	0.108137	-0.554352	0.579338	0.910575
FBgn0000568	Eip75B	5818.86	-0.297569	0.123744	-2.40472	0.0161849	0.198407
FBgn0000575	emc	3182.54	-0.0822098	0.0893586	-0.919999	0.357574	0.802452
FBgn0000576	ems	74.8173	0.589492	0.257484	2.28943	0.0220545	0.232985
FBgn0000577	en	71.3943	0.106449	0.281601	0.378013	0.705421	0.9455
FBgn0000578	ena	1373.3	-0.0508725	0.0989393	-0.514179	0.607127	0.918897
FBgn0000579	Eno	31808.8	0.537888	0.129518	4.153	3.28139e-05	0.00257488
FBgn0000581	E(Pc)	4073.67	-0.237326	0.123667	-1.91908	0.0549748	0.375931
FBgn0000588	esc	324.189	0.0356501	0.197748	0.18028	0.856933	0.980355
FBgn0000592	Est-6	7123.66	0.966344	0.172347	5.60698	2.05884e-08	8.28999e-06
FBgn0000606	eve	0.840214	3.16627	2.96909	1.06641	0.286239	NA
FBgn0000611	exd	3393.39	0.0778059	0.107496	0.723801	0.469188	0.867426
FBgn0000615	exu	85.9318	0.637368	0.37731	1.68924	0.0911728	0.472753
FBgn0000617	e(y)1	201.341	0.0702807	0.180393	0.389597	0.696834	0.94548
FBgn0000618	e(y)2	141.89	0.114099	0.179792	0.634615	0.52568	0.887959
FBgn0000625	eyg	145.506	-0.117775	0.238622	-0.493564	0.621614	0.923535
FBgn0000629	E(z)	796.123	-0.130744	0.119061	-1.09813	0.272149	0.740611
FBgn0000633	CG17716	1510.52	0.0141763	0.0927541	0.152837	0.878526	0.984165
FBgn0000635	Fas2	3666.16	0.0866346	0.095091	0.911071	0.362258	0.805186
FBgn0000636	Fas3	1964.86	0.0349406	0.120161	0.290781	0.771219	0.963471
FBgn0000639	Fbp1	6.39092	-0.00373286	0.896547	-0.0041636	0.996678	NA
FBgn0000640	Fbp2	2.98632	0.318296	1.27539	0.249568	0.802922	NA
FBgn0000644	Fcp3C	18.8377	-0.185607	0.532533	-0.348537	0.727437	0.953292
FBgn0000658	fj	121.27	1.1688	0.521866	2.23966	0.0251127	0.247789
FBgn0000659	fkh	525.684	0.0441125	0.125421	0.351716	0.725052	0.952427
FBgn0000662	fl(2)d	2615.4	-0.189521	0.113268	-1.67321	0.0942868	0.481036
FBgn0000667	Actn	6817.92	0.955331	0.595448	1.60439	0.108628	0.508145
FBgn0000709	fliI	1268.53	0.00583483	0.112958	0.0516546	0.958804	0.996085
FBgn0000711	flw	4796.88	-0.00425215	0.0784246	-0.0542195	0.95676	0.996074
FBgn0000715	FMRFa	239.283	-0.0409167	0.213045	-0.192057	0.847698	0.978666
FBgn0000719	fog	1516.37	-0.102831	0.0948586	-1.08405	0.278343	0.744965
FBgn0000721	for	7845.2	0.116542	0.121034	0.962887	0.335604	0.78618
FBgn0000723	FER	3205.41	0.0432762	0.109028	0.396928	0.691421	0.94548
FBgn0000808	gd	0.496255	2.40864	3.46587	0.694958	0.487081	NA
FBgn0000810	fs(1)K10	718.82	-0.16478	0.141607	-1.16365	0.244567	0.716589
FBgn0000826	png	4.18273	-0.652289	0.994092	-0.656166	0.511717	NA
FBgn0000927	fs(1)Ya	0.513198	2.45159	3.43448	0.713816	0.475341	NA
FBgn0000928	fs(1)Yb	3.93674	-0.263206	1.01375	-0.259636	0.795144	NA
FBgn0000964	tj	639.653	0.701445	0.202419	3.46531	0.000529628	0.0205359
FBgn0000996	dup	130.965	0.400001	0.283826	1.40932	0.158741	0.60169
FBgn0001075	ft	253.539	0.317991	0.390649	0.814008	0.41564	0.837497
FBgn0001077	ftz	2.68228	-0.089238	1.3183	-0.067692	0.946031	NA
FBgn0001078	ftz-f1	1774.55	0.000877529	0.0980946	0.00894575	0.992862	0.998777
FBgn0001079	fu	433.293	-0.000243121	0.13447	-0.001808	0.998557	0.999704
FBgn0001083	fw	488.831	0.550119	0.358659	1.53382	0.125074	0.547342
FBgn0001084	fy	110.87	-0.228361	0.20734	-1.10138	0.270729	0.739914
FBgn0001085	fz	358.193	0.084215	0.195881	0.429928	0.667248	0.937388
FBgn0001086	fzy	3.08741	0.797487	1.16553	0.684228	0.493831	NA
FBgn0001087	g	3543.83	0.0372161	0.0916263	0.406173	0.684615	0.944202
FBgn0001089	Gal	100.898	-0.0368179	0.253396	-0.145298	0.884476	0.986622
FBgn0001090	bnb	11773.7	0.273351	0.134768	2.0283	0.0425294	0.332752
FBgn0001091	Gapdh1	21171.4	1.01296	0.252538	4.01112	6.04317e-05	0.00415974
FBgn0001092	Gapdh2	20895	0.560242	0.17385	3.22256	0.00127048	0.0387775
FBgn0001098	Gdh	12398.5	0.467897	0.228425	2.04836	0.0405243	0.324101
FBgn0001099	gdl	3.44558	1.02604	1.08575	0.945003	0.344657	NA
FBgn0001104	Galphai	960.888	0.142973	0.130126	1.09873	0.271886	0.740611
FBgn0001105	Gbeta13F	7081.84	-0.0360576	0.112331	-0.320993	0.748215	0.958714
FBgn0001108	DCTN1-p150	2305.95	0.182866	0.108899	1.67922	0.0931092	0.477807
FBgn0001112	Gld	1131.45	-0.277632	0.134795	-2.05966	0.0394312	0.320103
FBgn0001114	Glt	28410.2	0.751917	0.213282	3.52546	0.000422743	0.0168277
FBgn0001120	gnu	2.12254	-1.19532	1.40463	-0.850986	0.394777	NA
FBgn0001122	Galphao	6698.44	0.0929676	0.141554	0.656765	0.511332	0.883739
FBgn0001123	Galphas	2337.17	-0.0733537	0.109087	-0.672434	0.501308	0.879536
FBgn0001124	Got1	7482.06	0.581787	0.198722	2.92765	0.00341534	0.0773923
FBgn0001125	Got2	8055.96	1.10981	0.272038	4.07962	4.51086e-05	0.00330239
FBgn0001128	Gpdh1	28804.1	0.235314	0.131533	1.78902	0.0736121	0.429366
FBgn0001133	grau	592.755	-0.0101748	0.117369	-0.0866903	0.930918	0.993472
FBgn0001134	Grd	336.664	0.217687	0.164658	1.32206	0.186149	0.639845
FBgn0001137	grk	534.359	-0.129308	0.14337	-0.901912	0.367103	0.807303
FBgn0001138	grn	178.829	0.210562	0.221187	0.951967	0.341114	0.790244
FBgn0001139	gro	2885.88	-0.049137	0.099372	-0.494475	0.620971	0.923167
FBgn0001142	Gs1	6401.24	0.339739	0.163423	2.07889	0.0376271	0.309876
FBgn0001145	Gs2	28827.9	0.44102	0.149347	2.95299	0.00314711	0.0735581
FBgn0001147	gsb-n	11.1379	-0.593692	0.640853	-0.92641	0.354233	0.801138
FBgn0001148	gsb	0.304591	1.72075	4.04659	0.425235	0.670666	NA
FBgn0001149	GstD1	7225.7	-0.0637722	0.156812	-0.406678	0.684245	0.944202
FBgn0001150	gt	332.682	0.169658	0.160576	1.05656	0.290714	0.754439
FBgn0001168	h	1132.43	0.128142	0.230901	0.554965	0.578919	0.910575
FBgn0001169	H	722.784	-0.0627954	0.134515	-0.466827	0.640623	0.929375
FBgn0001170	H2.0	20.3165	0.381926	0.512105	0.745796	0.45579	0.860581
FBgn0001174	halo	0.788572	0.655045	2.5967	0.25226	0.80084	NA
FBgn0001179	hay	464.656	0.0695866	0.142677	0.48772	0.625748	0.924461
FBgn0001180	hb	170.846	0.395786	0.181059	2.18594	0.0288197	0.268435
FBgn0001185	her	678.31	-0.0118389	0.130753	-0.0905443	0.927855	0.993467
FBgn0001186	Hex-A	9174.24	0.18371	0.133921	1.37178	0.170133	0.615113
FBgn0001187	Hex-C	3483.35	0.830308	0.215629	3.85064	0.000117811	0.00673969
FBgn0001189	hfw	1153.29	0.0163742	0.0987922	0.165744	0.868359	0.983432
FBgn0001197	His2Av	1380.66	-0.0397271	0.10826	-0.366961	0.713648	0.949227
FBgn0001202	hook	2724.45	0.036755	0.0845957	0.434478	0.663941	0.936892
FBgn0001206	Hmr	287.979	0.0616454	0.158594	0.3887	0.697498	0.94548
FBgn0001208	Hn	20477.4	0.306136	0.208873	1.46566	0.142742	0.579885
FBgn0001215	Hrb98DE	7230.46	-0.156209	0.117614	-1.32815	0.184129	0.636915
FBgn0001216	Hsc70-1	542.303	0.662451	0.196662	3.36847	0.000755861	0.0270072
FBgn0001217	Hsc70-2	4.99829	-0.639509	1.05018	-0.608953	0.542555	NA
FBgn0001218	Hsc70-3	14722.3	0.500241	0.141488	3.53557	0.000406902	0.0163213
FBgn0001220	Hsc70-5	6855.95	-0.108874	0.0807737	-1.34789	0.177693	0.62932
FBgn0001222	Hsf	1638.56	-0.0310735	0.110405	-0.281449	0.778366	0.964332
FBgn0001224	Hsp23	240.045	-0.35147	0.152959	-2.2978	0.0215732	0.231404
FBgn0001225	Hsp26	246.084	-0.202366	0.170781	-1.18495	0.236039	0.704613
FBgn0001226	Hsp27	93.059	0.361696	0.292948	1.23468	0.21695	0.681211
FBgn0001227	Hsp67Ba	10.891	-0.126463	0.673195	-0.187854	0.850991	0.979103
FBgn0001229	Hsp67Bc	241.621	0.44205	0.277758	1.5915	0.111498	0.516109
FBgn0001230	Hsp68	297.478	0.213834	0.196731	1.08693	0.277066	0.744574
FBgn0001233	Hsp83	22886.9	-0.393911	0.157315	-2.50397	0.0122809	0.17029
FBgn0001234	lncRNA:Hsromega	4509.2	-0.298977	0.103991	-2.87504	0.0040398	0.0871762
FBgn0001235	hth	4949.6	-0.103611	0.138206	-0.749688	0.453442	0.859995
FBgn0001247	Ide	2822.7	0.0887939	0.0898305	0.988461	0.322927	0.777714
FBgn0001248	Idh	10907.9	0.281947	0.143985	1.95817	0.0502106	0.360326
FBgn0001250	if	3952.99	0.338633	0.124686	2.71588	0.00661004	0.117888
FBgn0001253	ImpE1	182.975	0.063917	0.207734	0.307687	0.758321	0.961174
FBgn0001254	ImpE2	0.977496	1.1124	2.47237	0.449931	0.65276	NA
FBgn0001255	ImpE3	13.4689	-0.0254897	0.55577	-0.0458639	0.963419	0.996091
FBgn0001256	ImpL1	9.21507	0.40618	0.794866	0.511004	0.609348	0.919998
FBgn0001257	ImpL2	2359.46	-1.18761	0.5098	-2.32957	0.0198291	0.223456
FBgn0001258	Ldh	384.593	1.05053	0.196411	5.34862	8.86268e-08	2.81162e-05
FBgn0001259	in	102.254	0.202396	0.253695	0.797793	0.424991	0.842959
FBgn0001263	inaD	18743.3	0.0477985	0.100597	0.475148	0.634682	0.92928
FBgn0001269	inv	114.517	-0.126126	0.220305	-0.572505	0.56698	0.906487
FBgn0001276	ix	234.849	0.156161	0.16047	0.973146	0.330481	0.78223
FBgn0001280	janA	427.542	-0.0311251	0.194712	-0.159852	0.872998	0.984102
FBgn0001285	Jon44E	10.1993	0.607194	0.675635	0.898702	0.368812	0.807726
FBgn0001291	Jra	1170.7	-0.140602	0.104268	-1.34848	0.177505	0.628933
FBgn0001296	kar	2504.22	-0.248217	0.138368	-1.79389	0.0728303	0.428047
FBgn0001297	kay	4554.22	0.10598	0.0845212	1.25389	0.209883	0.673622
FBgn0001301	kel	1043.14	-0.0898687	0.104835	-0.85724	0.391312	0.820086
FBgn0001308	Khc	4156.26	0.103437	0.0904694	1.14334	0.252899	0.724811
FBgn0001311	kkv	334.485	3.49344	1.40339	2.48929	NA	NA
FBgn0001313	kl-2	0.682437	2.86355	3.09858	0.924149	0.355409	NA
FBgn0001316	klar	4657.67	-0.0590602	0.0839359	-0.703635	0.48166	0.87249
FBgn0001319	kn	302.389	-0.0222921	0.141162	-0.157919	0.87452	0.984102
FBgn0001320	kni	431.55	-0.0169822	0.13751	-0.123498	0.901713	0.988857
FBgn0001321	knk	27.3422	0.533875	0.50585	1.0554	0.291241	0.754704
FBgn0001323	knrl	404.711	-0.193371	0.123286	-1.56847	0.116771	0.530057
FBgn0001324	kto	1401.14	0.0101673	0.0917687	0.110792	0.911781	0.990845
FBgn0001325	Kr	72.7076	-0.264168	0.281379	-0.938834	0.347816	0.79452
FBgn0001330	kz	328.909	-0.672585	0.186501	-3.60633	0.000310555	0.0135467
FBgn0001341	Mybbp1A	325.661	-0.170422	0.169543	-1.00518	0.314808	0.771197
FBgn0001404	egh	2805.29	-0.0464918	0.0836619	-0.55571	0.578409	0.910575
FBgn0001491	l(1)10Bb	548.719	-0.0669779	0.175997	-0.380563	0.703528	0.94548
FBgn0001565	Hlc	3203.75	-0.0139647	0.127931	-0.109158	0.913077	0.990878
FBgn0001612	Grip91	465.23	-0.146078	0.129616	-1.12701	0.259739	0.729735
FBgn0001624	dlg1	9624.13	0.00502784	0.0804113	0.0625265	0.950144	0.994962
FBgn0001941	ifc	1069.97	-0.128375	0.132706	-0.967365	0.333362	0.784085
FBgn0001942	eIF4A	36860.6	-0.169696	0.129534	-1.31005	0.190178	0.644947
FBgn0001961	Arpc1	2177.59	0.00428953	0.0968268	0.0443011	0.964664	0.996091
FBgn0001965	Sos	2483.21	0.0249488	0.104562	0.238604	0.811413	0.970561
FBgn0001970	Pgant35A	0.320879	-0.0425559	4.0681	-0.0104609	0.991654	NA
FBgn0001974	Rnmt	197.92	0.0530361	0.190399	0.278553	0.780588	0.9647
FBgn0001977	CIAPIN1	351.5	0.133162	0.134135	0.992745	0.320834	0.775708
FBgn0001978	stc	1365.53	-0.207876	0.117917	-1.7629	0.077917	0.441403
FBgn0001981	esg	12.289	0.105649	0.654059	0.161528	0.871678	0.984102
FBgn0001983	wor	0.598174	-1.2238	3.38903	-0.361108	0.718019	NA
FBgn0001986	Mtr4	675.672	-0.259583	0.152687	-1.7001	0.0891129	0.469372
FBgn0001987	Gli	1067.5	0.0516008	0.113496	0.454648	0.649363	0.931395
FBgn0001989	ND-B17	1974.13	0.332899	0.167946	1.98218	0.0474588	0.348351
FBgn0001990	wek	294.137	0.0541341	0.163828	0.330432	0.741073	0.95628
FBgn0001991	Ca-alpha1D	8502.03	-0.120917	0.107075	-1.12927	0.258784	0.729153
FBgn0001992	Cyp303a1	109.665	0.165295	0.241858	0.68344	0.494329	0.878077
FBgn0001994	crp	3790.85	-0.240005	0.137285	-1.74823	0.0804248	0.447118
FBgn0001995	mRpL4	391.437	0.378238	0.156594	2.4154	0.0157179	0.194972
FBgn0002021	l(2)37Bb	660.644	0.0584154	0.132621	0.440467	0.659599	0.934669
FBgn0002022	Catsup	1372.46	0.0446973	0.140239	0.318722	0.749938	0.958971
FBgn0002023	Lim3	335.02	-0.0446263	0.160875	-0.277397	0.781475	0.965341
FBgn0002031	l(2)37Cc	2411.78	0.031344	0.0890212	0.352095	0.724767	0.952427
FBgn0002036	CG10561	925.033	0.0906492	0.145476	0.623122	0.533205	0.891401
FBgn0002044	swm	2647.45	0.0165895	0.092558	0.179234	0.857754	0.980679
FBgn0002069	AspRS	391.635	-0.156142	0.219427	-0.711591	0.476718	0.870968
FBgn0002121	l(2)gl	2257.08	-0.315242	0.133344	-2.36412	0.0180729	0.212352
FBgn0002174	CG5504	1049.7	0.192354	0.116603	1.64965	0.0990147	0.490343
FBgn0002183	dre4	1367.73	-0.143856	0.124965	-1.15117	0.249662	0.720229
FBgn0002283	l(3)73Ah	516.9	-0.148005	0.130691	-1.13248	0.257433	0.728199
FBgn0002284	Prosbeta6	1083.9	0.167423	0.108643	1.54104	0.123307	0.544521
FBgn0002306	sas	1758.61	0.00412394	0.12488	0.0330232	0.973656	0.997695
FBgn0002354	l(3)87Df	246.27	-0.150849	0.222245	-0.678753	0.497294	0.878497
FBgn0002413	dco	2998.82	-0.053694	0.104379	-0.514415	0.606962	0.918897
FBgn0002431	hyd	6640.18	-0.077901	0.101193	-0.769825	0.441404	0.853066
FBgn0002440	l(3)mbn	4.00789	1.26779	1.18061	1.07385	0.28289	NA
FBgn0002441	l(3)mbt	1310.76	0.126388	0.11772	1.07364	0.282984	0.747933
FBgn0002466	sti	26.8434	0.0427404	0.381687	0.111978	0.910841	0.990554
FBgn0002521	pho	1216.43	-0.30115	0.123791	-2.43273	0.0149856	0.189933
FBgn0002522	lab	67.4996	0.24598	0.339017	0.725569	0.468103	0.867221
FBgn0002524	lace	976.002	-0.0286719	0.0974471	-0.294231	0.768581	0.962937
FBgn0002525	Lam	989.432	-0.112443	0.122752	-0.916013	0.35966	0.802832
FBgn0002526	LanA	2355.21	0.457285	0.193321	2.36542	0.0180096	0.211845
FBgn0002531	Lcp1	9.33221	2.58135	1.02755	2.51213	0.0120004	0.167353
FBgn0002533	Lcp2	5.25227	0.0177303	0.872146	0.0203295	0.983781	NA
FBgn0002534	Lcp3	3.24117	0.324799	1.46002	0.222462	0.823954	NA
FBgn0002535	Lcp4	0.791968	1.8277	2.55413	0.715585	0.474248	NA
FBgn0002542	lds	125.467	-0.0224846	0.256359	-0.0877073	0.930109	0.993472
FBgn0002543	robo2	527.559	-0.205407	0.162644	-1.26293	0.206615	0.667815
FBgn0002552	lin	482.692	-0.0961136	0.1206	-0.796962	0.425473	0.842959
FBgn0002561	l(1)sc	0.297799	-1.76085	4.04973	-0.434807	0.663702	NA
FBgn0002562	Lsp1alpha	30.473	5.48152	2.19524	2.497	NA	NA
FBgn0002563	Lsp1beta	6724.03	1.36973	0.728554	1.88007	0.060099	0.389583
FBgn0002564	Lsp1gamma	15.6043	0.88946	0.575257	1.5462	0.122057	0.542318
FBgn0002565	Lsp2	180.046	6.13029	1.57201	3.89965	9.63318e-05	0.00590272
FBgn0002566	lt	1502.49	-0.350306	0.189841	-1.84526	0.0649994	0.40553
FBgn0002567	Rab32	7819.14	0.279692	0.164463	1.70064	0.0890112	0.469214
FBgn0002569	Mal-A2	10.1836	-0.540999	0.748185	-0.723082	0.469629	0.867575
FBgn0002570	Mal-A1	221.588	0.016033	0.182129	0.0880312	0.929852	0.993472
FBgn0002573	sens	14.561	1.54312	0.56034	2.75389	0.00588915	0.111087
FBgn0002576	lz	865.899	-0.0900744	0.164767	-0.546677	0.584601	0.911555
FBgn0002577	m	6.98997	-0.993111	0.833025	-1.19217	0.233193	0.701067
FBgn0002578	Kaz-m1	1.71864	1.43787	1.80582	0.796243	0.425891	NA
FBgn0002579	RpL36	24464.3	-0.192864	0.143413	-1.34482	0.178685	0.631346
FBgn0002590	RpS5a	29659.4	-0.143062	0.154231	-0.927585	0.353623	0.800095
FBgn0002592	E(spl)m2-BFM	36.9427	0.302017	0.381397	0.791872	0.428435	0.844007
FBgn0002593	RpLP1	48063.4	-0.282051	0.186512	-1.51224	0.130472	0.55744
FBgn0002609	E(spl)m3-HLH	56.8643	0.773447	0.450238	1.71786	0.0858218	0.463367
FBgn0002622	RpS3	33880.2	-0.279064	0.150894	-1.8494	0.0643996	0.403229
FBgn0002626	RpL32	26166.9	-0.26315	0.173561	-1.51618	0.129474	0.555972
FBgn0002632	E(spl)m6-BFM	0.472531	-0.821094	3.5965	-0.228304	0.81941	NA
FBgn0002633	E(spl)m7-HLH	2.72745	1.74375	1.53112	1.13887	0.254756	NA
FBgn0002638	Rcc1	762.064	-0.00247388	0.112807	-0.0219303	0.982504	0.998567
FBgn0002641	mal	335.577	0.0225204	0.155183	0.145122	0.884615	0.986622
FBgn0002643	mam	3070.64	0.0211869	0.0796599	0.265967	0.790265	0.966279
FBgn0002645	Map205	2328.04	-0.0216267	0.136931	-0.157938	0.874505	0.984102
FBgn0002673	twe	47.1542	-0.403541	0.36263	-1.11282	0.265788	0.734371
FBgn0002707	mei-9	276.352	-0.130428	0.181221	-0.719719	0.471698	0.868329
FBgn0002709	mei-218	1.49234	0.470104	2.28991	0.205294	0.837343	NA
FBgn0002715	mei-S332	66.7195	-0.052164	0.335578	-0.155445	0.87647	0.984102
FBgn0002716	mei-W68	18.1491	-0.533854	0.552908	-0.965538	0.334276	0.784824
FBgn0002719	Men	20840.6	0.513918	0.270383	1.90071	0.0573402	0.382038
FBgn0002723	Met	1254.07	-0.135521	0.0999141	-1.35638	0.174978	0.623926
FBgn0002732	E(spl)malpha-BFM	5.11777	-1.08934	0.919631	-1.18454	0.236198	NA
FBgn0002733	E(spl)mbeta-HLH	178.508	0.103674	0.271035	0.382512	0.702082	0.94548
FBgn0002734	E(spl)mdelta-HLH	0.320879	-0.0425559	4.0681	-0.0104609	0.991654	NA
FBgn0002735	E(spl)mgamma-HLH	1.57653	4.08549	2.08208	1.96221	0.0497379	NA
FBgn0002736	mago	510.271	0.00158661	0.193749	0.00818901	0.993466	0.999001
FBgn0002772	Mlc1	9678.96	1.48329	0.910643	1.62884	0.103348	0.499565
FBgn0002773	Mlc2	25972.8	1.75462	0.858358	2.04416	0.0409377	0.325945
FBgn0002774	mle	3250	0.00104137	0.0899757	0.0115739	0.990766	0.998774
FBgn0002775	msl-3	354.957	-0.14885	0.12977	-1.14704	0.251367	0.722975
FBgn0002778	mnd	852.421	-0.120815	0.162008	-0.745735	0.455827	0.860581
FBgn0002780	mod	3112.98	-0.245136	0.159127	-1.54051	0.123437	0.544571
FBgn0002781	mod(mdg4)	3527.77	0.0658977	0.101715	0.647868	0.51707	0.883849
FBgn0002783	mor	2168.65	-0.0826522	0.111459	-0.741549	0.45836	0.862123
FBgn0002787	Rpn8	1645.89	0.0731305	0.104118	0.702379	0.482443	0.873369
FBgn0002789	Mp20	4533.32	0.00846023	0.18566	0.0455685	0.963654	0.996091
FBgn0002791	mr	460.287	-0.00840023	0.131399	-0.063929	0.949027	0.99463
FBgn0002842	sa	1.35365	-2.73858	1.91338	-1.43128	0.152349	NA
FBgn0002862	Mst87F	3.22745	-1.91674	1.90259	-1.00744	0.313724	NA
FBgn0002865	Mst98Ca	0.304591	1.72075	4.04659	0.425235	0.670666	NA
FBgn0002868	MtnA	17594.9	-0.722902	0.225542	-3.20517	0.00134981	0.0401794
FBgn0002869	MtnB	15.3079	4.59468	2.52303	1.8211	NA	NA
FBgn0002872	mu2	226.753	0.0909604	0.178448	0.50973	0.610241	0.920132
FBgn0002873	mud	35.1551	-0.793583	0.392665	-2.02102	0.0432779	0.335612
FBgn0002878	mus101	190.976	-0.104819	0.166723	-0.628701	0.529545	0.889583
FBgn0002887	mus201	380.392	-0.10582	0.129747	-0.815588	0.414736	0.836584
FBgn0002891	mus205	340.028	0.139189	0.14293	0.973828	0.330142	0.78223
FBgn0002899	mus301	40.7748	0.885091	0.457317	1.9354	0.0529413	0.369741
FBgn0002901	mus304	96.4852	0.0461443	0.253677	0.181902	0.85566	0.979648
FBgn0002905	mus308	475.823	-0.126126	0.154563	-0.816022	0.414488	0.836436
FBgn0002906	Blm	192.828	0.066447	0.163777	0.405716	0.684952	0.944202
FBgn0002914	Myb	2083.94	-0.135303	0.0933148	-1.44996	0.14707	0.586504
FBgn0002917	na	4008.49	-0.0631053	0.120674	-0.52294	0.601016	0.918454
FBgn0002921	Atpalpha	87103.6	0.307318	0.173637	1.76988	0.0767464	0.438091
FBgn0002922	nau	18.6684	0.981438	0.507898	1.93235	0.053316	0.370258
FBgn0002924	ncd	67.2726	0.0457464	0.328539	0.139242	0.889259	0.988009
FBgn0002926	ndl	0.626125	2.75321	3.21489	0.856394	0.39178	NA
FBgn0002930	nec	5749.99	0.203974	0.122506	1.66501	0.09591	0.484829
FBgn0002931	net	163.882	0.0584473	0.237362	0.246237	0.805499	0.970132
FBgn0002932	neur	120.604	0.00588987	0.257496	0.0228737	0.981751	0.998567
FBgn0002937	ninaB	2732.55	0.395812	0.154626	2.5598	0.0104734	0.154431
FBgn0002938	ninaC	85317.7	0.221825	0.137285	1.6158	0.106138	0.503071
FBgn0002939	ninaD	151.141	0.941077	0.521498	1.80456	0.071143	0.424488
FBgn0002940	ninaE	675678	-0.319566	0.217535	-1.46903	0.141825	0.577927
FBgn0002941	slou	121.833	0.0205949	0.201398	0.10226	0.918551	0.990878
FBgn0002945	nkd	1447.36	-0.901064	0.168312	-5.35353	8.62556e-08	2.81162e-05
FBgn0002948	nod	104.75	0.0281613	0.263534	0.10686	0.9149	0.990878
FBgn0002962	nos	1.28582	-0.632747	2.03061	-0.311604	0.755341	NA
FBgn0002973	numb	1951.1	0.0301455	0.123276	0.244536	0.806815	0.97055
FBgn0002985	odd	52.7028	-0.106788	0.284208	-0.375738	0.707112	0.946159
FBgn0002989	okr	124.443	0.222207	0.212203	1.04714	0.295033	0.758133
FBgn0003002	opa	189.172	-0.0416092	0.186179	-0.22349	0.823154	0.973799
FBgn0003008	or	353.603	0.0873133	0.142864	0.611162	0.541093	0.896597
FBgn0003011	ort	485.668	0.0520277	0.14153	0.367608	0.713166	0.949227
FBgn0003015	osk	3.44125	0.47573	1.21826	0.390501	0.696166	NA
FBgn0003016	osp	2728.32	-0.0308236	0.084819	-0.363405	0.716303	0.950033
FBgn0003023	otu	7.13808	0.483895	0.793513	0.609813	0.541986	0.897366
FBgn0003028	ovo	460.251	0.0722359	0.129422	0.558144	0.576746	0.910575
FBgn0003041	pbl	418.822	-0.0717365	0.1419	-0.505544	0.613177	0.921261
FBgn0003042	Pc	714.309	-0.132123	0.122512	-1.07845	0.280832	0.745843
FBgn0003044	Pcl	755.289	0.0426765	0.115981	0.367962	0.712901	0.949175
FBgn0003046	Pcp	23.027	0.716024	0.470176	1.52288	0.127788	0.55213
FBgn0003048	pcx	1829.7	0.0945313	0.0985408	0.959311	0.337402	0.787624
FBgn0003053	peb	921.275	-0.258816	0.113092	-2.28855	0.0221053	0.233287
FBgn0003060	CG9757	102.743	-3.10558	0.95387	-3.25577	0.00113086	0.0353402
FBgn0003062	Fib	1079.96	-0.53324	0.227218	-2.34682	0.0189345	0.2181
FBgn0003065	CG2150	2.13558	0.680298	1.52193	0.446997	0.654877	NA
FBgn0003068	per	1789.02	0.763086	0.228542	3.33894	0.000840993	0.0290573
FBgn0003071	Pfk	9939.38	0.389045	0.172373	2.257	0.0240079	0.242371
FBgn0003074	Pgi	11783	0.631212	0.165952	3.80357	0.000142625	0.00792014
FBgn0003076	Pgm1	10404.9	0.748099	0.176406	4.24078	2.22746e-05	0.00196794
FBgn0003079	Raf	1114.11	0.00900417	0.0953466	0.0944362	0.924763	0.993162
FBgn0003082	phr	682.671	-0.0659178	0.14577	-0.452205	0.651121	0.931557
FBgn0003086	Pig1	0.707332	-0.0724255	2.39623	-0.0302247	0.975888	NA
FBgn0003087	pim	9.95868	-0.518648	0.677799	-0.765195	0.444156	0.855698
FBgn0003089	pip	55.3258	1.51512	0.729014	2.07832	0.0376801	0.309876
FBgn0003090	pk	594.072	0.0757785	0.124815	0.607128	0.543766	0.89742
FBgn0003091	Pkc53E	5042.81	-0.172275	0.0783066	-2.20001	0.0278061	0.262254
FBgn0003093	Pkc98E	5785.97	0.005697	0.103477	0.0550556	0.956094	0.995923
FBgn0003116	pn	618.361	0.627009	0.219389	2.85798	0.00426343	0.0898065
FBgn0003117	pnr	120.695	-0.038145	0.285997	-0.133375	0.893896	0.988009
FBgn0003118	pnt	573.348	-0.143944	0.15263	-0.943091	0.345634	0.792997
FBgn0003124	polo	4.90034	0.401736	0.956683	0.419926	0.67454	NA
FBgn0003129	Poxm	10.3937	0.653837	0.665882	0.981912	0.326143	0.780381
FBgn0003130	Poxn	35.2247	-0.141766	0.369706	-0.383456	0.701382	0.94548
FBgn0003132	Pp1-13C	7.46353	0.0669546	0.736148	0.0909526	0.92753	0.993467
FBgn0003134	Pp1alpha-96A	3650.19	0.156836	0.192521	0.814642	0.415277	0.837034
FBgn0003137	Ppn	19847.6	0.0257839	0.205235	0.125631	0.900024	0.988009
FBgn0003139	PpV	825.455	-0.138804	0.118211	-1.1742	0.240315	0.711926
FBgn0003140	PpY-55A	0.297799	-1.76085	4.04973	-0.434807	0.663702	NA
FBgn0003141	pr	1666.68	0.487445	0.173033	2.81706	0.0048466	0.0973878
FBgn0003145	prd	1.72721	-0.756305	1.81867	-0.415856	0.677516	NA
FBgn0003149	Prm	9806	1.22309	0.826804	1.4793	0.139061	0.572901
FBgn0003159	CG2841	2910.3	0.0913007	0.155776	0.586101	0.557808	0.901574
FBgn0003162	Pu	3932.55	0.572232	0.254068	2.25228	0.0243047	0.244425
FBgn0003165	pum	4549.49	-0.0020053	0.090551	-0.0221455	0.982332	0.998567
FBgn0003169	put	1814.04	0.0240086	0.107427	0.223488	0.823155	0.973799
FBgn0003174	pwn	268.431	0.0779696	0.284073	0.274471	0.783723	0.965825
FBgn0003175	px	4123.29	-0.0155662	0.11906	-0.130742	0.895979	0.988009
FBgn0003187	qua	19.7855	0.23293	0.494995	0.47057	0.637948	0.92928
FBgn0003189	r	1273.51	-0.931149	0.186561	-4.99112	6.00303e-07	0.000112224
FBgn0003204	ras	4192.73	0.147696	0.124537	1.18597	0.235636	0.704038
FBgn0003205	Ras85D	1472.36	-0.063042	0.0923049	-0.682976	0.494622	0.878108
FBgn0003206	Ras64B	961.227	0.0531613	0.155035	0.342898	0.731675	0.953655
FBgn0003209	raw	3549.9	-0.303147	0.124662	-2.43175	0.0150262	0.190029
FBgn0003210	rb	1865.22	-0.129399	0.100017	-1.29377	0.195746	0.650562
FBgn0003218	rdgB	8111.76	-0.00247645	0.0813569	-0.0304393	0.975717	0.998277
FBgn0003227	rec	33.7399	0.229111	0.385793	0.593869	0.552599	0.900387
FBgn0003231	ref(2)P	8615.13	-0.0778151	0.118986	-0.653985	0.513121	0.883739
FBgn0003248	Rh2	7727.87	-0.186637	0.169362	-1.102	0.27046	0.739862
FBgn0003249	Rh3	17537.7	0.207447	0.115352	1.79838	0.0721162	0.427511
FBgn0003250	Rh4	19104.6	-0.168256	0.113216	-1.48615	0.137241	0.570827
FBgn0003254	rib	30.7624	-0.220946	0.409139	-0.540026	0.589179	0.912829
FBgn0003255	rk	257.187	0.150383	0.149428	1.00639	0.314229	0.77104
FBgn0003256	rl	3308.31	-0.223942	0.133489	-1.6776	0.0934255	0.477807
FBgn0003257	r-l	205.182	-0.558766	0.230952	-2.41941	0.0155459	0.19398
FBgn0003261	Rm62	24559	-0.273577	0.117569	-2.32694	0.0199683	0.223703
FBgn0003267	ro	8.76925	0.121595	0.671866	0.18098	0.856383	0.980096
FBgn0003268	rod	242.56	-0.053665	0.159235	-0.337017	0.736104	0.954488
FBgn0003274	RpLP2	30486.4	-0.185616	0.145308	-1.2774	0.201462	0.658908
FBgn0003275	RpII18	380.285	-0.22348	0.1561	-1.43165	0.152245	0.592071
FBgn0003277	RpII215	3458.4	-0.171708	0.123168	-1.3941	0.163288	0.606243
FBgn0003278	RpI135	411.076	-0.450789	0.17797	-2.53295	0.0113108	0.161117
FBgn0003279	RpL4	50882.8	-0.200068	0.155949	-1.28291	0.199525	0.656656
FBgn0003285	rst	370.25	0.0431275	0.1606	0.268541	0.788283	0.966189
FBgn0003292	rt	286.866	0.0350455	0.176161	0.198941	0.842309	0.978045
FBgn0003295	ru	147.47	-0.129811	0.178279	-0.728131	0.466533	0.866032
FBgn0003300	run	59.1631	-0.318881	0.328037	-0.972087	0.331007	0.78267
FBgn0003301	rut	6317.07	0.0229943	0.130147	0.176679	0.85976	0.981178
FBgn0003302	rux	282.67	0.0830899	0.142773	0.581971	0.560586	0.902788
FBgn0003308	ry	1877.64	0.638071	0.216777	2.94345	0.00324577	0.0743521
FBgn0003310	S	1200.72	-0.0385905	0.0931339	-0.414355	0.678614	0.942675
FBgn0003312	sad	11.0714	-0.766311	0.735961	-1.04124	0.297765	0.758652
FBgn0003317	sax	1134.09	-0.0200096	0.0969582	-0.206373	0.836499	0.976604
FBgn0003319	Sb	17.8092	-0.230177	0.582742	-0.39499	0.69285	0.94548
FBgn0003321	sbr	4065.45	-0.158848	0.12585	-1.2622	0.206876	0.668078
FBgn0003326	sca	456.62	-0.0351739	0.176461	-0.19933	0.842005	0.978026
FBgn0003328	scb	772.063	0.0239871	0.139399	0.172075	0.863379	0.98218
FBgn0003330	Sce	415.748	-0.0929271	0.128987	-0.72044	0.471254	0.867974
FBgn0003334	Scm	1605.93	-0.153811	0.11016	-1.39624	0.162641	0.606243
FBgn0003339	Scr	455.625	0.0698923	0.135755	0.514841	0.606664	0.918897
FBgn0003345	sd	3007.35	-0.0640715	0.0842563	-0.760437	0.446994	0.857489
FBgn0003346	RanGAP	277.2	0.109023	0.165524	0.658654	0.510118	0.883739
FBgn0003353	sei	1519.57	-0.0589506	0.0968058	-0.608957	0.542553	0.89742
FBgn0003356	Jon99Cii	6.59407	-0.562751	0.89608	-0.628014	0.529995	NA
FBgn0003357	Jon99Ciii	7.10847	-0.502961	0.853751	-0.589119	0.555781	0.900908
FBgn0003358	Jon99Ci	0.727666	1.48452	2.66057	0.557971	0.576864	NA
FBgn0003360	sesB	51500.1	0.608175	0.234794	2.59025	0.00959052	0.14636
FBgn0003366	sev	3404.19	-0.202867	0.142096	-1.42768	0.153385	0.59423
FBgn0003371	sgg	11259.2	-0.0883734	0.091753	-0.963166	0.335464	0.786028
FBgn0003372	Sgs1	97.6882	0.297833	0.24985	1.19205	0.233243	0.701067
FBgn0003374	Sgs4	0.704592	-0.0875148	2.73148	-0.0320393	0.974441	NA
FBgn0003380	Sh	13739	0.0854992	0.133668	0.639637	0.522409	0.886117
FBgn0003382	sha	1.33379	-1.57628	2.0931	-0.753085	0.451399	NA
FBgn0003386	Shaw	2574.39	-0.0704004	0.0925363	-0.760788	0.446784	0.857489
FBgn0003388	shd	380.215	-2.63916	0.68141	-3.87308	0.000107468	0.00628538
FBgn0003390	shf	1419.75	-0.456283	0.165823	-2.75162	0.00593006	0.111175
FBgn0003391	shg	2791.52	-0.160507	0.119793	-1.33988	0.180285	0.632327
FBgn0003392	shi	15614.9	0.0408663	0.147306	0.277424	0.781454	0.965341
FBgn0003396	shn	3252.2	-0.235208	0.125394	-1.87576	0.0606884	0.391519
FBgn0003401	shu	4.72558	-0.204674	1.14087	-0.179401	0.857623	NA
FBgn0003410	sina	999.916	-0.0434749	0.0996182	-0.436415	0.662536	0.93619
FBgn0003415	skd	4098.57	-0.1133	0.0993589	-1.14031	0.254156	0.72573
FBgn0003416	sl	450.938	-0.0788294	0.133931	-0.588582	0.556141	0.900908
FBgn0003423	slgA	9420.87	0.13731	0.139298	0.985725	0.324268	0.779243
FBgn0003429	slo	12213.2	-0.0424798	0.0839335	-0.506113	0.612778	0.921094
FBgn0003430	slp1	262.152	0.0180536	0.153145	0.117886	0.906158	0.98983
FBgn0003435	sm	6012.47	-0.0400359	0.10761	-0.372047	0.709858	0.94696
FBgn0003444	smo	417.226	0.0334848	0.12666	0.264368	0.791496	0.966658
FBgn0003447	sn	2766.94	0.316953	0.0891258	3.55624	0.000376201	0.0156086
FBgn0003448	sna	0.366763	-0.0425549	3.88671	-0.0109488	0.991264	NA
FBgn0003449	snf	810.92	0.0398066	0.123228	0.323032	0.746671	0.958423
FBgn0003450	snk	0.968136	0.121364	2.4704	0.0491275	0.960818	NA
FBgn0003459	stwl	414.338	-0.160169	0.183233	-0.874128	0.382048	0.814187
FBgn0003460	so	675.056	-0.0738422	0.110083	-0.67079	0.502355	0.88034
FBgn0003462	Sod1	7657.48	0.0741803	0.103268	0.718328	0.472555	0.868671
FBgn0003463	sog	1955.49	0.0194584	0.0930584	0.209099	0.834371	0.976327
FBgn0003464	sol	3686.62	-0.0919835	0.137746	-0.667778	0.504275	0.881345
FBgn0003475	spir	5902.46	0.0381357	0.0889167	0.428892	0.668002	0.937509
FBgn0003479	spn-A	141.029	-0.0991306	0.226945	-0.436805	0.662253	0.93619
FBgn0003480	spn-B	39.4261	0.240455	0.333472	0.721067	0.470868	0.867974
FBgn0003482	spn-D	2.26688	0.0263975	1.31214	0.0201179	0.983949	NA
FBgn0003483	spn-E	77.0961	-0.217573	0.248614	-0.875141	0.381497	0.813918
FBgn0003495	spz	1340.9	-0.119035	0.111069	-1.07172	0.283848	0.748635
FBgn0003499	sr	628.619	-0.455599	0.195808	-2.32676	0.019978	0.223703
FBgn0003502	Btk29A	1426.29	-0.0726155	0.100892	-0.719734	0.471689	0.868329
FBgn0003507	srp	2365.43	-0.0857778	0.164439	-0.52164	0.601921	0.918454
FBgn0003512	Sry-delta	421.533	-0.181651	0.178162	-1.01959	0.307925	0.766329
FBgn0003513	ss	157.477	0.426429	0.192129	2.21949	0.0264532	0.254009
FBgn0003514	sqh	2553.8	0.0337893	0.115183	0.293353	0.769252	0.963216
FBgn0003515	st	609.527	0.187471	0.127549	1.46979	0.141619	0.57779
FBgn0003517	sta	41725.4	-0.261161	0.180438	-1.44737	0.147793	0.586504
FBgn0003520	stau	4488.82	-0.0509544	0.131576	-0.387261	0.698563	0.94548
FBgn0003525	stg	22.8595	0.91324	0.528578	1.72773	0.0840365	0.458218
FBgn0003527	stil	0.323626	-0.0425558	4.05619	-0.0104916	0.991629	NA
FBgn0003545	sub	0.691038	1.39987	2.68298	0.521759	0.601838	NA
FBgn0003557	Su(dx)	2943.95	-0.0998807	0.0947171	-1.05452	0.291647	0.755355
FBgn0003559	su(f)	1143.28	-0.136043	0.111609	-1.21892	0.222873	0.68848
FBgn0003567	su(Hw)	704.707	0.0655211	0.120366	0.544348	0.586202	0.911959
FBgn0003575	su(sable)	1915.76	-0.0437471	0.101158	-0.432462	0.665406	0.937084
FBgn0003598	Su(var)3-7	996.883	-0.0625452	0.12114	-0.516305	0.605642	0.918597
FBgn0003607	Su(var)205	1422.44	-0.108694	0.150872	-0.720442	0.471253	0.867974
FBgn0003612	Su(var)2-10	2107.54	-0.0836995	0.102875	-0.813602	0.415873	0.837497
FBgn0003638	su(w[a])	13066	-0.283844	0.141748	-2.00245	0.0452359	0.340947
FBgn0003651	svp	2653.45	0.00999018	0.131197	0.0761464	0.939303	0.993729
FBgn0003654	sw	2896.33	-0.0186414	0.0849673	-0.219395	0.826342	0.973977
FBgn0003655	swa	9.55699	0.765178	0.747407	1.02378	0.305941	0.764414
FBgn0003656	sws	4976.82	0.0997356	0.0874984	1.13986	0.254346	0.72573
FBgn0003660	Syb	2094.85	0.0743474	0.153859	0.483219	0.62894	0.926203
FBgn0003676	CCT1	1279.71	-0.225493	0.144171	-1.56407	0.117802	0.532232
FBgn0003683	term	3.06966	0.897125	1.24935	0.718071	0.472713	NA
FBgn0003687	Tbp	273.616	0.0682681	0.181176	0.376805	0.706319	0.945703
FBgn0003701	thr	18.3445	-0.661382	0.615216	-1.07504	0.282357	0.747407
FBgn0003710	tipE	1189.17	-0.00526673	0.108537	-0.0485247	0.961298	0.996091
FBgn0003714	tko	457.621	0.00150447	0.139975	0.0107482	0.991424	0.998774
FBgn0003716	tkv	2181.64	0.0643053	0.0952834	0.674884	0.499749	0.879454
FBgn0003719	tld	138.753	-0.0723807	0.340918	-0.212311	0.831864	0.975993
FBgn0003720	tll	0.456886	2.30128	4.00082	0.575202	0.565155	NA
FBgn0003721	Tm1	10906	0.508716	0.568219	0.895282	0.370636	0.807726
FBgn0003731	Egfr	5711.89	0.143342	0.158936	0.901886	0.367117	0.807303
FBgn0003733	tor	6.71187	0.749981	0.87333	0.858761	0.390472	0.819501
FBgn0003741	tra	475.606	-0.0116643	0.16524	-0.07059	0.943724	0.994273
FBgn0003742	tra2	483.891	-0.278583	0.158436	-1.75833	0.0786917	0.443688
FBgn0003744	trc	2121.45	0.0937537	0.112003	0.837066	0.402556	0.827968
FBgn0003747	Gr5a	3.91718	0.01715	0.989484	0.0173323	0.986172	NA
FBgn0003748	Treh	11369.8	0.293903	0.131066	2.24241	0.0249351	0.246697
FBgn0003751	trk	28.9929	-0.186188	0.418687	-0.444694	0.656541	0.933369
FBgn0003861	trp	64139.8	0.250766	0.137693	1.8212	0.068576	0.417269
FBgn0003862	trx	5468.19	-0.20666	0.138267	-1.49465	0.135006	0.565436
FBgn0003866	tsh	299.255	0.00227894	0.142431	0.0160003	0.987234	0.998774
FBgn0003867	tsl	2191.18	0.241822	0.124254	1.94619	0.0516322	0.365475
FBgn0003870	ttk	2554.76	0.000413519	0.115675	0.00357482	0.997148	0.999704
FBgn0003882	tub	1079.75	0.0493961	0.125732	0.392868	0.694417	0.94548
FBgn0003884	alphaTub84B	19407.2	0.189178	0.107266	1.76363	0.0777947	0.440949
FBgn0003885	alphaTub84D	2892.01	0.124203	0.108226	1.14763	0.251122	0.722975
FBgn0003886	alphaTub85E	21.5567	1.70065	0.88752	1.91619	0.0553413	0.376528
FBgn0003888	betaTub60D	346.17	0.191446	0.170017	1.12604	0.260147	0.729763
FBgn0003889	betaTub85D	24.0803	0.5638	0.409026	1.3784	0.168081	0.613329
FBgn0003890	betaTub97EF	3619.5	0.192243	0.0977665	1.96635	0.0492587	0.357455
FBgn0003891	tud	15795.6	-0.183232	0.113173	-1.61904	0.105438	0.502999
FBgn0003892	ptc	248.436	-0.151413	0.149617	-1.012	0.311536	0.768851
FBgn0003896	tup	542.313	-0.240699	0.149507	-1.60995	0.107408	0.50492
FBgn0003900	twi	10.4818	0.556305	0.68717	0.80956	0.418193	0.840319
FBgn0003916	snRNA:U1:21D	27.9303	-1.02299	0.658461	-1.5536	0.120279	0.538376
FBgn0003920	snRNA:U2:14B	4.00971	-0.50594	1.26806	-0.398989	0.689901	NA
FBgn0003922	snRNA:U2:38ABa	10.8672	0.0225842	0.66367	0.0340292	0.972854	0.997695
FBgn0003923	snRNA:U2:38ABb	0.644505	0.119243	2.77879	0.0429119	0.965772	NA
FBgn0003930	snRNA:U4:39B	15.5878	-0.462205	0.587118	-0.787244	0.431139	0.844748
FBgn0003931	snRNA:U4:38AB	0.626125	2.75321	3.21489	0.856394	0.39178	NA
FBgn0003935	snRNA:U5:34A	2.37477	-0.0336695	1.78426	-0.0188703	0.984945	NA
FBgn0003941	RpL40	29046.9	-0.0658007	0.146638	-0.448728	0.653628	0.932573
FBgn0003942	RpS27A	26858.9	-0.134969	0.144897	-0.931483	0.351604	0.798071
FBgn0003943	Ubi-p63E	73773.4	-0.229444	0.0934059	-2.45642	0.0140331	0.182727
FBgn0003944	Ubx	18.4801	1.04524	0.465305	2.24636	0.0246809	0.246121
FBgn0003950	unc	30.5641	-0.505317	0.392314	-1.28804	0.197731	0.653774
FBgn0003963	ush	623.909	-0.238721	0.115145	-2.07322	0.0381521	0.312703
FBgn0003964	usp	1464.99	-0.0869863	0.0990795	-0.877945	0.379974	0.812489
FBgn0003965	v	1187.72	0.352175	0.269629	1.30615	0.191503	0.646515
FBgn0003969	vap	1581.64	-0.0480622	0.116143	-0.413818	0.679008	0.942675
FBgn0003975	vg	78.9503	0.315474	0.253345	1.24524	0.213044	0.676687
FBgn0003977	vir	837.929	0.001903	0.129698	0.0146725	0.988293	0.998774
FBgn0003978	vls	176.12	0.0198888	0.17492	0.113702	0.909474	0.990554
FBgn0003979	Vm26Aa	0.552946	0.888886	3.436	0.258698	0.795868	NA
FBgn0003980	Vm26Ab	0.455587	-0.820626	3.63975	-0.225462	0.82162	NA
FBgn0003984	vn	850.225	0.081708	0.199562	0.409438	0.682218	0.943317
FBgn0003996	w	661.952	0.0463991	0.157448	0.294696	0.768226	0.962726
FBgn0003997	hid	493.13	-0.0889676	0.228946	-0.388597	0.697575	0.94548
FBgn0004003	wbl	217.468	0.303224	0.163539	1.85414	0.0637187	0.401608
FBgn0004034	y	81.3088	1.021	0.263874	3.86925	0.000109172	0.00634954
FBgn0004045	Yp1	411521	0.461525	0.262926	1.75534	0.0792008	0.444983
FBgn0004047	Yp3	841914	0.896031	0.26308	3.40593	0.000659397	0.0242286
FBgn0004049	yrt	1398.39	0.0193238	0.0941122	0.205328	0.837316	0.976875
FBgn0004050	z	971.605	-0.0651536	0.127246	-0.512027	0.608632	0.919773
FBgn0004052	Z600	0.475921	0.838374	3.00201	0.279271	0.780037	NA
FBgn0004055	uzip	3533.61	0.0508377	0.140168	0.362692	0.716835	0.950033
FBgn0004057	Zw	974.376	0.518592	0.117291	4.42142	9.80557e-06	0.00101638
FBgn0004066	Prosalpha4	888.881	-0.0422141	0.108283	-0.389849	0.696648	0.94548
FBgn0004087	Dhfr	249.715	0.301302	0.149824	2.01104	0.044321	0.338683
FBgn0004101	bs	413.331	0.0931961	0.143422	0.649804	0.515819	0.883739
FBgn0004102	oc	905.872	-0.125052	0.131593	-0.95029	0.341965	0.790304
FBgn0004103	Pp1-87B	6894.12	-0.00048666	0.102705	-0.00473843	0.996219	0.999692
FBgn0004106	Cdk1	11.2447	-0.226314	0.656897	-0.34452	0.730455	0.953655
FBgn0004107	Cdk2	150.906	0.402497	0.193028	2.08518	0.0370528	0.307617
FBgn0004108	Nrt	1196.07	0.0413851	0.1266	0.326897	0.743746	0.956947
FBgn0004110	tin	1.32052	-0.692977	1.99513	-0.347335	0.72834	NA
FBgn0004117	Tm2	8943.47	0.889592	0.632197	1.40714	0.159385	0.602243
FBgn0004118	nAChRbeta2	1752.92	0.0314936	0.103286	0.304917	0.760429	0.961174
FBgn0004132	boca	527.102	-0.00458933	0.128476	-0.0357213	0.971505	0.997695
FBgn0004133	blow	780.505	0.0881228	0.107772	0.81768	0.41354	0.836436
FBgn0004167	kst	11619.5	-0.0738105	0.0885477	-0.833567	0.404525	0.829127
FBgn0004168	5-HT1A	1299.9	-0.049226	0.107197	-0.45921	0.646083	0.930761
FBgn0004169	up	12018.4	1.20019	0.766267	1.56629	0.117281	0.531291
FBgn0004177	mts	7414.52	0.0856832	0.102055	0.839578	0.401145	0.826691
FBgn0004179	Csp	6847.37	0.154789	0.139467	1.10987	0.267057	0.736323
FBgn0004183	snRNA:U1:82Eb	12.8657	-1.56993	0.938955	-1.67199	0.0945256	0.481786
FBgn0004185	snRNA:U1:95Ca	29.1452	-0.875482	0.672989	-1.30089	0.193298	0.647295
FBgn0004186	snRNA:U1:95Cb	28.2498	-1.08014	0.626205	-1.72489	0.0845472	0.460039
FBgn0004187	snRNA:U1:95Cc	8.51632	-1.75165	0.957832	-1.82877	0.0674341	0.413993
FBgn0004188	snRNA:U6:96Aa	13.2858	-0.729074	0.585463	-1.24529	0.213023	0.676687
FBgn0004189	snRNA:U6:96Ab	12.9873	-0.749057	0.60874	-1.2305	0.218508	0.682855
FBgn0004190	snRNA:U6:96Ac	13.8379	-0.657978	0.6175	-1.06555	0.286626	0.749611
FBgn0004191	snRNA:U2:34ABa	12.0779	1.1766	0.722017	1.62961	0.103184	0.499565
FBgn0004192	snRNA:U2:34ABb	26.897	0.386156	0.642611	0.600917	0.547896	0.898225
FBgn0004197	Ser	64.1298	-0.0277706	0.320927	-0.0865324	0.931043	0.993472
FBgn0004198	ct	3549.44	-0.0222743	0.121693	-0.183036	0.85477	0.979168
FBgn0004227	nonA	3650.85	-0.0538148	0.0844311	-0.637382	0.523876	0.887051
FBgn0004228	mex1	2.25871	-0.975274	1.98193	-0.492084	0.62266	NA
FBgn0004237	Hrb87F	2673.05	-0.0449616	0.136392	-0.32965	0.741664	0.956468
FBgn0004240	DptA	63.4659	-4.09094	0.676258	-6.04937	1.45413e-09	8.4574e-07
FBgn0004242	Syt1	23300.9	0.0205484	0.147805	0.139024	0.889431	0.988009
FBgn0004244	Rdl	8246.54	-0.0584355	0.134831	-0.433397	0.664726	0.937084
FBgn0004359	T48	529.321	0.0428275	0.157545	0.271843	0.785743	0.965858
FBgn0004360	Wnt2	41.4093	0.339936	0.335119	1.01437	0.310404	0.767868
FBgn0004362	HmgD	1518.91	-0.2906	0.146283	-1.98656	0.0469709	0.346422
FBgn0004363	porin	20282.7	0.341904	0.134039	2.55078	0.0107484	0.156719
FBgn0004364	18w	2334.55	0.19818	0.0892667	2.22009	0.0264128	0.253917
FBgn0004367	mei-41	224.476	-0.125143	0.158962	-0.787256	0.431132	0.844748
FBgn0004368	Ptp4E	3146.46	-0.190126	0.0925726	-2.0538	0.0399946	0.322883
FBgn0004369	Ptp99A	3727.19	-0.067435	0.0986947	-0.683269	0.494437	0.878077
FBgn0004370	Ptp10D	2577.77	0.145403	0.125253	1.16087	0.245693	0.717664
FBgn0004373	fwd	4998.48	-0.113598	0.0953461	-1.19143	0.233485	0.701298
FBgn0004374	neb	33.8394	0.229749	0.384517	0.597501	0.550173	0.898699
FBgn0004378	Klp61F	6.60424	-1.27605	0.909326	-1.40329	0.160531	NA
FBgn0004379	Klp67A	19.7739	-0.31685	0.522437	-0.606484	0.544193	0.89742
FBgn0004380	Klp64D	1638.94	0.017311	0.093873	0.184409	0.853693	0.979103
FBgn0004381	Klp68D	1376.99	0.210215	0.0899299	2.33754	0.0194109	0.221074
FBgn0004387	Klp98A	3138.1	-0.11383	0.110004	-1.03478	0.300771	0.760758
FBgn0004390	RasGAP1	1489.02	-0.0517358	0.109505	-0.472452	0.636604	0.92928
FBgn0004391	shtd	357.736	0.0777182	0.154379	0.503424	0.614666	0.921823
FBgn0004394	pdm2	134.696	0.158051	0.228024	0.693132	0.488227	0.875371
FBgn0004395	unk	1649.64	-0.346122	0.122125	-2.83418	0.00459441	0.0944969
FBgn0004396	CrebA	790.637	-0.0879283	0.129254	-0.680275	0.49633	0.878321
FBgn0004397	Vinc	4459.67	0.123782	0.143414	0.863112	0.388076	0.817643
FBgn0004400	rhi	3.90068	-0.104892	1.16897	-0.0897303	0.928502	NA
FBgn0004401	Pep	8743.97	-0.112705	0.1164	-0.968254	0.332918	0.783367
FBgn0004403	RpS14a	21007.2	-0.235381	0.150046	-1.56873	0.116711	0.530057
FBgn0004404	RpS14b	8186.05	-0.14328	0.146661	-0.97695	0.328594	0.781545
FBgn0004406	tam	151.495	0.0492543	0.18592	0.264922	0.79107	0.966607
FBgn0004419	me31B	2060.92	-0.00580363	0.12962	-0.0447741	0.964287	0.996091
FBgn0004425	LysB	1.07622	1.32815	2.41072	0.550935	0.581678	NA
FBgn0004426	LysC	0.512267	-2.49368	3.43034	-0.726949	0.467257	NA
FBgn0004427	LysD	1.32485	2.68611	1.96993	1.36355	0.172708	NA
FBgn0004428	LysE	0.988837	-0.0782703	2.11918	-0.0369343	0.970537	NA
FBgn0004429	LysP	2.4294	-1.53115	1.63978	-0.933757	0.350429	NA
FBgn0004430	LysS	2.9121	-1.78866	1.32659	-1.34831	0.177558	NA
FBgn0004431	LysX	10.385	0.454	0.806592	0.562862	0.573529	0.909331
FBgn0004432	Cyp1	15514.4	-0.0329464	0.163129	-0.201964	0.839944	0.977209
FBgn0004435	Galphaq	2335.77	-0.0163672	0.12844	-0.12743	0.8986	0.988009
FBgn0004436	Ubc6	3371.58	0.15926	0.137071	1.16189	0.245282	0.717079
FBgn0004449	Ten-m	8918.11	-0.0697562	0.117137	-0.595511	0.551502	0.899606
FBgn0004456	mew	1309.27	-0.0386961	0.105827	-0.365652	0.714624	0.9494
FBgn0004463	RpIII128	461.015	-0.125081	0.151149	-0.827533	0.407935	0.831356
FBgn0004465	Su(P)	842.603	0.42624	0.109098	3.90695	9.34681e-05	0.00582451
FBgn0004507	GlyP	22874.2	0.956613	0.534274	1.79049	0.0733747	0.429139
FBgn0004509	Fur1	3710.62	-0.00550872	0.1023	-0.0538484	0.957056	0.996085
FBgn0004510	Ets97D	256.894	-0.100337	0.158662	-0.632392	0.527131	0.88851
FBgn0004511	dy	27.3592	-1.04906	0.41194	-2.54663	0.0108768	0.157933
FBgn0004512	Mdr49	1183.07	0.10799	0.128922	0.837642	0.402232	0.827542
FBgn0004513	Mdr65	2489.71	0.330148	0.219146	1.50652	0.131933	0.559115
FBgn0004514	Oct-TyrR	404.41	0.0446152	0.167962	0.265627	0.790527	0.966374
FBgn0004516	Gad1	11859.5	0.150829	0.209749	0.719096	0.472082	0.868671
FBgn0004552	Akh	6.56661	-0.12214	0.916335	-0.133292	0.893963	NA
FBgn0004554	Edg91	16.7842	0.20902	0.805502	0.25949	0.795257	0.967749
FBgn0004556	Dbp73D	289.679	-0.292615	0.20963	-1.39587	0.162754	0.606243
FBgn0004567	slp2	207.017	0.0552423	0.17268	0.319911	0.749036	0.958714
FBgn0004569	aos	680.393	-0.25927	0.1158	-2.23895	0.0251594	0.248016
FBgn0004573	5-HT7	491.504	0.0991514	0.130546	0.759512	0.447546	0.857489
FBgn0004574	Rop	7409.83	0.164972	0.147332	1.11973	0.26283	0.73236
FBgn0004575	Syn	10861.3	0.673715	0.0819009	8.22597	1.93611e-16	2.25212e-13
FBgn0004577	Pxd	95.2403	7.53575	2.0074	3.75398	NA	NA
FBgn0004580	Cbp53E	6123.88	0.229641	0.196522	1.16853	0.242594	0.715211
FBgn0004581	bgcn	2.55207	1.18633	1.28477	0.923381	0.355809	NA
FBgn0004583	ex	1249.67	0.00124777	0.132915	0.00938776	0.99251	0.998777
FBgn0004584	Rrp1	215.693	0.306319	0.1758	1.74244	0.0814322	0.450025
FBgn0004587	B52	12606.1	-0.118722	0.10594	-1.12066	0.262433	0.732254
FBgn0004588	Eig71Ea	0.338478	1.85279	4.03456	0.459229	0.64607	NA
FBgn0004589	Eig71Eb	1.46295	2.85044	1.8653	1.52814	0.126478	NA
FBgn0004595	pros	10423.2	-0.0384239	0.0964211	-0.398502	0.69026	0.94548
FBgn0004597	CycC	258.765	0.01539	0.18048	0.0852724	0.932045	0.993472
FBgn0004598	Fur2	5478.3	0.0524238	0.0944997	0.554751	0.579065	0.910575
FBgn0004606	zfh1	1131.71	-0.0371183	0.108284	-0.342786	0.731759	0.953655
FBgn0004607	zfh2	2250.92	-0.182902	0.159774	-1.14476	0.25231	0.724428
FBgn0004611	Plc21C	6542.57	0.0120109	0.0810984	0.148103	0.882261	0.985295
FBgn0004618	gl	1615.97	-0.106955	0.0951978	-1.1235	0.261223	0.731216
FBgn0004619	GluRIA	988.241	0.104199	0.15113	0.689464	0.490531	0.877242
FBgn0004620	GluRIIA	266.175	-0.408964	0.210718	-1.94081	0.0522813	0.367831
FBgn0004622	TkR99D	380.382	-0.0103803	0.132496	-0.078344	0.937554	0.993729
FBgn0004623	Gbeta76C	23124.3	0.193324	0.126663	1.52629	0.126937	0.55
FBgn0004635	rho	447.468	-0.224441	0.13431	-1.67106	0.0947095	0.482254
FBgn0004636	Rap1	3502.35	-0.0156303	0.180757	-0.0864714	0.931092	0.993472
FBgn0004638	drk	1381.27	-0.035448	0.164568	-0.2154	0.829455	0.975367
FBgn0004643	Zw10	516.311	-0.127467	0.137141	-0.92946	0.352651	0.79902
FBgn0004644	hh	87.9341	-0.0146085	0.274594	-0.0532005	0.957572	0.996085
FBgn0004646	ogre	3910.4	0.345197	0.141345	2.44223	0.0145968	0.186814
FBgn0004647	N	1432.03	0.0978628	0.1384	0.7071	0.479504	0.871358
FBgn0004648	svr	8005.02	0.0123964	0.0851624	0.145562	0.884267	0.986508
FBgn0004649	yl	0.555686	0.894141	2.8839	0.310046	0.756526	NA
FBgn0004650	fs(1)N	8.30446	-2.22129	0.83316	-2.66611	0.00767357	0.130413
FBgn0004652	fru	4508.52	-0.0253115	0.08873	-0.285265	0.775441	0.964332
FBgn0004654	Pgd	2397.92	0.625594	0.147999	4.22701	2.36812e-05	0.00204891
FBgn0004655	wapl	2281.55	-0.0851987	0.123751	-0.688466	0.491159	0.877315
FBgn0004656	fs(1)h	6571.26	-0.0903065	0.091774	-0.98401	0.325111	0.779923
FBgn0004657	mys	3295.53	0.0974055	0.1351	0.720991	0.470915	0.867974
FBgn0004666	sim	118.885	0.0480526	0.201559	0.238405	0.811567	0.970561
FBgn0004687	Mlc-c	2481.56	-0.0818541	0.111204	-0.736071	0.461687	0.863982
FBgn0004698	Xpc	2644.42	-0.137505	0.0967327	-1.42149	0.155174	0.596592
FBgn0004777	Ccp84Ag	124.662	0.839904	0.477748	1.75805	0.0787398	0.443688
FBgn0004779	Ccp84Ae	1.58828	-1.03164	2.6919	-0.383238	0.701543	NA
FBgn0004780	Ccp84Ad	1.69239	4.17802	3.06964	1.36108	0.173489	NA
FBgn0004781	Ccp84Ac	0.472531	-0.821094	3.5965	-0.228304	0.81941	NA
FBgn0004782	Ccp84Ab	44.0426	4.32433	1.69948	2.5445	NA	NA
FBgn0004783	Ccp84Aa	32.7796	6.13553	2.76142	2.22187	NA	NA
FBgn0004784	inaC	18187	-0.0501115	0.0911065	-0.550032	0.582297	0.911491
FBgn0004795	retn	1706.57	-0.0549583	0.110009	-0.49958	0.617371	0.922157
FBgn0004797	mdy	2469.74	0.0592031	0.196145	0.301834	0.762779	0.961417
FBgn0004811	fs(2)ltoPP43	519.268	-0.0921264	0.167429	-0.55024	0.582155	0.911491
FBgn0004828	His3.3B	18920.7	0.00467706	0.156231	0.0299368	0.976117	0.998277
FBgn0004832	Xpac	158.958	0.382398	0.180072	2.12358	0.0337055	0.292105
FBgn0004837	Su(H)	471.396	0.015389	0.123259	0.124851	0.900642	0.988138
FBgn0004838	Hrb27C	15278.8	-0.159652	0.138526	-1.15251	0.249111	0.719829
FBgn0004839	otk	130.947	-0.100346	0.190934	-0.525552	0.5992	0.918446
FBgn0004841	TkR86C	160.873	-0.137146	0.180312	-0.760604	0.446893	0.857489
FBgn0004842	RYa-R	25.4697	-0.0532474	0.434569	-0.122529	0.90248	0.989015
FBgn0004852	Ac76E	2595.73	0.14829	0.100427	1.47659	0.139785	0.574786
FBgn0004854	B-H2	127.995	0.0268492	0.206965	0.129728	0.896781	0.988009
FBgn0004855	RpII15	394.943	0.162592	0.169365	0.960009	0.337051	0.787544
FBgn0004856	Bx42	1154.28	0.0679677	0.0919767	0.738967	0.459927	0.862758
FBgn0004858	elB	1046.4	0.199891	0.116154	1.72091	0.0852667	0.462038
FBgn0004859	ci	1239.97	-0.142475	0.13996	-1.01797	0.308691	0.766529
FBgn0004860	ph-d	1553.75	-0.0859412	0.106789	-0.804773	0.420951	0.841798
FBgn0004861	ph-p	2122.51	0.0501446	0.0997949	0.502477	0.615332	0.921823
FBgn0004862	bap	17.0672	0.590103	0.532153	1.1089	0.267474	0.737199
FBgn0004863	C15	37.2365	-0.352631	0.338168	-1.04277	0.297054	0.758133
FBgn0004864	hop	1407.4	-0.0967288	0.111036	-0.871146	0.383674	0.814507
FBgn0004865	Eip78C	824.404	-0.00948342	0.128593	-0.0737474	0.941211	0.994002
FBgn0004867	RpS2	39452	-0.0871604	0.169269	-0.514923	0.606607	0.918897
FBgn0004868	Gdi	6454.02	0.137543	0.0916036	1.50151	0.133225	0.561711
FBgn0004870	bab1	293.022	-0.167388	0.149444	-1.12008	0.262681	0.73236
FBgn0004872	piwi	22.4871	-0.32249	0.418091	-0.771339	0.440506	0.852747
FBgn0004875	enc	6415.59	0.112233	0.098817	1.13577	0.256054	0.727245
FBgn0004876	cdi	2791.42	-0.157505	0.0974018	-1.61706	0.105865	0.503071
FBgn0004878	cas	28.75	-0.225336	0.431732	-0.521933	0.601717	0.918454
FBgn0004880	scrt	3270.16	-0.163682	0.0866397	-1.88923	0.0588615	0.387456
FBgn0004882	orb	637.457	-0.0346275	0.114354	-0.302809	0.762035	0.961174
FBgn0004885	tok	6079.01	0.0809196	0.181443	0.445979	0.655612	0.933019
FBgn0004888	Scsalpha1	8139.07	0.268882	0.133876	2.00844	0.044597	0.339634
FBgn0004889	tws	3319.61	-0.0813298	0.121816	-0.667646	0.504359	0.881345
FBgn0004892	sob	41.9891	-0.21304	0.352712	-0.604005	0.545841	0.897444
FBgn0004893	bowl	622.44	0.0606401	0.117934	0.514185	0.607123	0.918897
FBgn0004896	fd59A	214.41	0.0502963	0.20138	0.249758	0.802774	0.969907
FBgn0004897	fd96Ca	6.00125	-0.32877	0.826272	-0.397896	0.690707	NA
FBgn0004898	fd96Cb	12.6431	0.748566	0.604457	1.23841	0.215564	0.680356
FBgn0004901	Prat	213.31	-0.117583	0.179412	-0.655378	0.512225	0.883739
FBgn0004903	Rb97D	1391.3	-0.282392	0.119881	-2.35559	0.0184931	0.215116
FBgn0004907	14-3-3zeta	41196.9	0.0574316	0.0996847	0.576132	0.564526	0.90503
FBgn0004908	Arl2	157.758	-0.139449	0.180911	-0.770815	0.440817	0.852747
FBgn0004910	Eip63F-1	1488.59	-0.0585717	0.121941	-0.48033	0.630993	0.927921
FBgn0004911	asRNA:Eig63F-2	14.6706	-0.580589	0.569554	-1.01938	0.308025	0.766329
FBgn0004913	Gnf1	826.886	0.0280235	0.116502	0.240541	0.809911	0.97055
FBgn0004914	Hnf4	3314.08	-0.0742339	0.109182	-0.679913	0.49656	0.878321
FBgn0004915	TfIIB	689.08	0.0303456	0.107922	0.281181	0.778571	0.964332
FBgn0004919	gol	3916.5	0.487804	0.202571	2.40807	0.0160373	0.197289
FBgn0004921	Ggamma1	23492	-0.00450597	0.103077	-0.0437146	0.965132	0.996091
FBgn0004924	Top1	4296.17	-0.0856749	0.0824831	-1.0387	0.298946	0.760065
FBgn0004926	eIF2beta	3089.41	-0.232561	0.202395	-1.14905	0.250537	0.722157
FBgn0004956	upd1	2.29188	0.575298	1.36844	0.420405	0.674189	NA
FBgn0004957	por	201.698	-0.0398551	0.178382	-0.223426	0.823204	0.973799
FBgn0004959	phm	53.8917	-0.198913	0.507069	-0.39228	0.694852	0.94548
FBgn0005198	gig	1969.72	-0.113988	0.115693	-0.985261	0.324496	0.779392
FBgn0005278	Sam-S	9016.9	0.0316008	0.136888	0.230852	0.81743	0.971557
FBgn0005322	nmd	1017.92	-0.0270364	0.103206	-0.261965	0.793349	0.967119
FBgn0005355	Su(fu)	480.312	-0.121428	0.121052	-1.0031	0.31581	0.772201
FBgn0005386	ash1	2014.92	-0.0794655	0.105311	-0.754581	0.4505	0.8587
FBgn0005390	fs(1)M3	37.14	-0.259686	0.388192	-0.668962	0.50352	0.880821
FBgn0005391	Yp2	757878	1.20113	0.272156	4.41339	1.01764e-05	0.00103434
FBgn0005411	U2af50	1770.49	-0.106222	0.0991301	-1.07154	0.283927	0.748635
FBgn0005427	ewg	3803.34	-0.155769	0.120131	-1.29666	0.19475	0.649169
FBgn0005533	RpS17	20596.8	-0.145507	0.146073	-0.996123	0.31919	0.775377
FBgn0005536	Mbs	6718	0.032782	0.0985444	0.332662	0.739389	0.955756
FBgn0005558	ey	1363.99	0.0361005	0.114815	0.314423	0.7532	0.959627
FBgn0005561	sv	1030.74	-0.0226444	0.122181	-0.185335	0.852966	0.979103
FBgn0005564	Shal	2337.06	0.0690821	0.118405	0.583438	0.559599	0.902152
FBgn0005585	Calr	11963.7	0.024318	0.139811	0.173935	0.861916	0.981872
FBgn0005586	Rab3	7337.05	0.164778	0.144835	1.13769	0.25525	0.726736
FBgn0005590	scw	1.16566	-0.435344	2.04214	-0.213181	0.831186	NA
FBgn0005593	RpL7	35592.3	-0.191635	0.159755	-1.19955	0.230312	0.697265
FBgn0005596	yem	457.786	-0.0474399	0.119623	-0.396579	0.691678	0.94548
FBgn0005612	Sox14	1557.92	0.126884	0.116103	1.09286	0.274456	0.741557
FBgn0005613	Sox15	121.236	-0.0794485	0.216855	-0.366367	0.714092	0.9494
FBgn0005614	trpl	75614.4	-0.131385	0.0879605	-1.49369	0.135257	0.56595
FBgn0005616	msl-2	842.669	0.012541	0.127714	0.0981957	0.921777	0.992014
FBgn0005617	msl-1	1081.41	-0.104164	0.106484	-0.978213	0.327969	0.781463
FBgn0005619	Hdc	2948.41	0.200439	0.146745	1.3659	0.17197	0.619317
FBgn0005624	Psc	451.075	-0.0839071	0.158539	-0.529252	0.596631	0.917334
FBgn0005626	ple	2672.5	0.442317	0.205259	2.15492	0.0311683	0.281734
FBgn0005631	robo1	2564.77	0.0600634	0.100227	0.599274	0.54899	0.898225
FBgn0005632	faf	10390.2	-0.0237383	0.0877957	-0.270381	0.786867	0.966148
FBgn0005633	fln	10.1247	-0.817665	0.756349	-1.08107	0.279667	0.745843
FBgn0005636	nvy	613.582	0.19465	0.150669	1.2919	0.196391	0.651464
FBgn0005638	slbo	28.1945	0.842008	0.419889	2.00531	0.0449298	0.339634
FBgn0005640	Eip63E	2353.27	-0.0852139	0.0904794	-0.941804	0.346293	0.793378
FBgn0005642	wdn	986.053	-0.278421	0.171331	-1.62505	0.104152	0.500859
FBgn0005648	Pabp2	860.182	0.0923498	0.143525	0.64344	0.519938	0.885511
FBgn0005649	Rox8	4152.28	0.0141223	0.12396	0.113926	0.909296	0.990554
FBgn0005655	PCNA	34.0615	2.2294	0.558352	3.99282	6.5293e-05	0.00435383
FBgn0005658	Ets65A	591.317	0.0429765	0.126484	0.339778	0.734024	0.954261
FBgn0005659	Ets98B	1679.61	0.0298	0.100071	0.297787	0.765865	0.962051
FBgn0005660	Ets21C	39.8821	-1.02648	0.394346	-2.603	0.00924126	0.143185
FBgn0005664	Crys	1699.49	4.14253	1.52228	2.72126	NA	NA
FBgn0005666	bt	17111.1	0.351365	0.28432	1.23581	0.21653	0.681211
FBgn0005670	Cyp4d1	688.747	-0.380909	0.268752	-1.41732	0.156388	0.598621
FBgn0005671	Vha55	14684.1	0.194124	0.140261	1.38402	0.166351	0.610408
FBgn0005672	spi	2612.36	-0.252147	0.100115	-2.51858	0.0117829	0.164913
FBgn0005674	GluProRS	2361.64	-0.196087	0.158521	-1.23698	0.216095	0.680596
FBgn0005677	dac	875.656	0.0377784	0.121374	0.311255	0.755606	0.96029
FBgn0005683	pie	38.3272	-0.224094	0.377501	-0.593626	0.552762	0.900387
FBgn0005694	Aef1	1757.14	-0.119979	0.130507	-0.919328	0.357924	0.802477
FBgn0005695	gcl	761.396	-0.0394502	0.11357	-0.347365	0.728317	0.953292
FBgn0005696	DNApol-alpha73	42.2827	0.671033	0.369486	1.81613	0.0693508	0.419638
FBgn0005771	noc	1479.87	0.0362007	0.0967222	0.374275	0.7082	0.946594
FBgn0005775	Con	3166.04	0.0264999	0.12743	0.207957	0.835263	0.976604
FBgn0005777	PpD3	1093.11	0.0171038	0.101307	0.168831	0.86593	0.983341
FBgn0005778	PpD5	10.6055	0.11845	0.788183	0.150282	0.880542	0.984464
FBgn0005779	PpD6	0.606584	-2.75519	3.9806	-0.692154	0.488841	NA
FBgn0008635	betaCOP	3615.63	0.189057	0.153799	1.22924	0.218981	0.683768
FBgn0008636	hbn	183.555	0.0108621	0.162397	0.0668862	0.946672	0.99463
FBgn0008646	E5	70.1218	-0.0043254	0.243678	-0.0177505	0.985838	0.998725
FBgn0008651	lbl	312.995	-0.324159	0.155214	-2.08847	0.0367559	0.306637
FBgn0010014	CanB	2110.75	0.0516215	0.138338	0.373155	0.709033	0.946594
FBgn0010015	CanA1	367.518	0.0157738	0.210348	0.0749893	0.940223	0.993861
FBgn0010019	Cyp4g1	375.537	1.19729	2.84437	0.420933	0.673804	0.940005
FBgn0010038	GstD2	42.8455	-0.192654	0.316249	-0.609185	0.542402	0.89742
FBgn0010039	GstD3	384.503	0.136231	0.150244	0.906737	0.364546	0.806345
FBgn0010040	GstD4	3.50436	0.430627	1.14699	0.375441	0.707333	NA
FBgn0010041	GstD5	1.06861	-0.171081	2.10414	-0.081307	0.935198	NA
FBgn0010042	GstD6	1.1947	0.411719	1.99685	0.206185	0.836647	NA
FBgn0010043	GstD7	0.456886	2.30128	4.00082	0.575202	0.565155	NA
FBgn0010044	GstD8	21.158	0.744408	0.581997	1.27906	0.200877	0.658423
FBgn0010051	Itp-r83A	6489.12	-0.072151	0.0850814	-0.848024	0.396425	0.824264
FBgn0010052	Jhe	114.329	0.0469341	0.293928	0.159679	0.873134	0.984102
FBgn0010053	Jheh1	2879.86	-0.0617315	0.124594	-0.495462	0.620274	0.923127
FBgn0010078	RpL23	29607.3	-0.0960992	0.189018	-0.508412	0.611165	0.920132
FBgn0010100	mAcon1	26589.8	0.307645	0.147309	2.08843	0.0367589	0.306637
FBgn0010105	comm	618.379	0.0435667	0.111512	0.390691	0.696026	0.94548
FBgn0010109	dpn	1.61782	2.06916	2.1753	0.951207	0.341499	NA
FBgn0010113	hdc	1530.9	-0.0715301	0.103442	-0.691498	0.489252	0.875852
FBgn0010114	hig	16085.7	-0.0497156	0.0969758	-0.51266	0.608189	0.919707
FBgn0010173	RpA-70	995.703	0.0647029	0.1001	0.646382	0.518032	0.883849
FBgn0010194	Wnt5	615.837	0.0177206	0.153216	0.115657	0.907924	0.990251
FBgn0010197	Gyc32E	95.3761	-0.0567627	0.217448	-0.26104	0.794062	0.967419
FBgn0010198	RpS15Aa	24343.4	-0.190646	0.151186	-1.261	0.207309	0.66882
FBgn0010213	Sod2	3255.9	0.42987	0.197984	2.17124	0.0299134	0.274016
FBgn0010215	alpha-Cat	2549.72	-0.16	0.159546	-1.00284	0.315937	0.772201
FBgn0010217	ATPsynbeta	50317.6	0.51486	0.209249	2.46051	0.0138739	0.181104
FBgn0010220	Dbp45A	523.464	-0.170188	0.137232	-1.24015	0.214919	0.679354
FBgn0010222	Nmdmc	1481.91	-1.02012	0.330147	-3.0899	0.00200227	0.0534738
FBgn0010223	Galphaf	31.355	0.357029	0.425087	0.839896	0.400967	0.826594
FBgn0010225	Gel	21523.2	0.0062482	0.17679	0.0353424	0.971807	0.997695
FBgn0010226	GstS1	3185.91	0.563253	0.17119	3.29023	0.00100105	0.0328099
FBgn0010228	HmgZ	4602.94	0.1303	0.196391	0.663472	0.507028	0.883207
FBgn0010235	Klc	2990.62	0.0258992	0.0854937	0.302936	0.761938	0.961174
FBgn0010238	Lac	2254.41	0.0488565	0.134829	0.362358	0.717085	0.950033
FBgn0010240	Lcch3	866.963	0.0961973	0.127194	0.756306	0.449466	0.85819
FBgn0010241	Mdr50	1.05376	-1.13987	2.11633	-0.538606	0.590159	NA
FBgn0010246	Myo61F	771.842	0.100756	0.166677	0.604499	0.545512	0.89742
FBgn0010247	Parp	545.555	-0.0306916	0.142484	-0.215403	0.829453	0.975367
FBgn0010258	Rbp4	43.8156	-0.393851	0.38194	-1.03119	0.302454	0.761324
FBgn0010263	Rbp9	19389.5	-0.28655	0.0770444	-3.71929	0.000199784	0.00986576
FBgn0010265	RpS13	29874.9	-0.0421539	0.162421	-0.259535	0.795222	0.967749
FBgn0010269	Dsor1	912.337	-0.0594175	0.109776	-0.541261	0.588328	0.912745
FBgn0010278	Ssrp	586.107	0.0218748	0.131118	0.166833	0.867502	0.983432
FBgn0010280	Taf4	4325.46	-0.142103	0.121709	-1.16757	0.242981	0.715748
FBgn0010282	TfIIFalpha	773.206	0.304017	0.144196	2.10835	0.0350003	0.299851
FBgn0010287	Trf	96.4433	-0.0601799	0.257345	-0.233849	0.815102	0.9714
FBgn0010288	Uch	438.352	0.266393	0.130932	2.0346	0.0418911	0.330489
FBgn0010292	bys	567.201	-0.464266	0.187312	-2.47857	0.0131911	0.177275
FBgn0010295	ng3	0.452841	-0.821112	3.03492	-0.270555	0.786734	NA
FBgn0010300	brat	1594.34	-0.159604	0.0980472	-1.62783	0.10356	0.500072
FBgn0010303	hep	2419.36	-0.0831047	0.0923847	-0.899551	0.368359	0.80766
FBgn0010309	pigeon	616.058	0.187532	0.181419	1.0337	0.301279	0.760974
FBgn0010313	corto	3197.2	-0.00321763	0.111205	-0.0289341	0.976917	0.998277
FBgn0010314	Cks30A	12.2638	1.78135	0.943812	1.8874	0.0591064	0.387953
FBgn0010315	CycD	351.825	-0.26619	0.141783	-1.87744	0.0604576	0.390939
FBgn0010316	dap	309.211	0.0367065	0.175191	0.209524	0.83404	0.976327
FBgn0010317	CycJ	29.1074	-0.667842	0.450773	-1.48155	0.138461	0.572038
FBgn0010323	Gsc	29.7903	-0.119677	0.382114	-0.313196	0.754131	0.959995
FBgn0010328	woc	2114.75	-0.0431643	0.111895	-0.385758	0.699676	0.94548
FBgn0010329	Tbh	1085.85	0.0555412	0.113724	0.488386	0.625277	0.924461
FBgn0010333	Rac1	1394.11	0.165579	0.142928	1.15848	0.246669	0.717664
FBgn0010339	128up	719.321	-0.0177039	0.158359	-0.111796	0.910985	0.990554
FBgn0010340	140up	275.152	0.0151829	0.154699	0.0981451	0.921817	0.992014
FBgn0010341	Cdc42	2545.62	0.0390661	0.113587	0.343931	0.730898	0.953655
FBgn0010342	Map60	427.18	0.152334	0.148778	1.0239	0.305882	0.764414
FBgn0010348	Arf79F	7530.2	0.0814162	0.141253	0.576384	0.564355	0.90503
FBgn0010350	Cds	14395.2	0.0636325	0.111705	0.56965	0.568915	0.907179
FBgn0010352	Nc73EF	21038.7	0.0609617	0.0803047	0.759129	0.447775	0.857489
FBgn0010355	Taf1	2908.99	-0.150105	0.112136	-1.3386	0.180702	0.632394
FBgn0010356	Taf5	478.029	-0.0389106	0.125323	-0.310481	0.756195	0.960644
FBgn0010358	deltaTry	0.607883	-0.0156724	3.33853	-0.00469442	0.996254	NA
FBgn0010359	gammaTry	0.607883	-0.0156724	3.33853	-0.00469442	0.996254	NA
FBgn0010379	Akt1	2566.95	-0.0319161	0.130419	-0.244719	0.806674	0.97055
FBgn0010380	AP-1-2beta	3538	0.149456	0.104994	1.42348	0.154598	0.59547
FBgn0010382	CycE	55.1484	0.355227	0.327395	1.08501	0.277917	0.744882
FBgn0010383	Cyp18a1	1730.68	0.307521	0.185685	1.65614	0.097693	0.487943
FBgn0010385	Def	618.637	-0.912404	0.207479	-4.39757	1.09467e-05	0.00109144
FBgn0010387	Acbp2	1980.12	0.840185	0.246689	3.40585	0.00065958	0.0242286
FBgn0010388	Dro	113.265	-2.61115	1.05238	-2.48118	0.0130948	0.176662
FBgn0010389	htl	752.4	0.0362602	0.133727	0.271151	0.786275	0.966026
FBgn0010391	Gtp-bp	2339.58	0.0246004	0.195434	0.125876	0.89983	0.988009
FBgn0010395	Itgbn	34.227	-1.52898	0.406811	-3.75845	0.000170966	0.00893613
FBgn0010397	LamC	1596.34	0.125653	0.103072	1.21908	0.222813	0.68848
FBgn0010398	Lrr47	123.196	-0.0900639	0.251877	-0.357572	0.720664	0.950884
FBgn0010399	Nmdar1	1620.36	0.092597	0.118935	0.778552	0.436244	0.84826
FBgn0010401	Os-C	3.93464	-0.0303823	1.22095	-0.0248842	0.980147	NA
FBgn0010403	Obp83b	8.89619	0.389384	0.728693	0.53436	0.593093	0.914446
FBgn0010406	RNaseX25	1606.57	-0.101392	0.103127	-0.983173	0.325522	0.780381
FBgn0010407	Ror	243.886	-0.1048	0.176858	-0.592564	0.553473	0.900387
FBgn0010408	RpS9	5437.08	-0.354142	0.194477	-1.82099	0.0686078	0.417269
FBgn0010409	RpL18A	29814.4	-0.126214	0.171205	-0.737211	0.460994	0.863354
FBgn0010411	RpS18	25037.4	-0.13617	0.150821	-0.902864	0.366598	0.807303
FBgn0010412	RpS19a	21083.6	-0.166468	0.172339	-0.965937	0.334076	0.784739
FBgn0010414	SerT	626.493	0.0593174	0.14675	0.404208	0.68606	0.944423
FBgn0010415	Sdc	7223.19	-0.063909	0.143303	-0.445971	0.655618	0.933019
FBgn0010416	TH1	779.868	0.0127825	0.138626	0.0922089	0.926532	0.993467
FBgn0010417	Taf6	710.544	0.042649	0.166539	0.25609	0.797881	0.96869
FBgn0010421	TfIIFbeta	330.937	-0.0520532	0.146861	-0.35444	0.723009	0.9515
FBgn0010422	TfIIS	788.631	0.0376212	0.110809	0.339514	0.734222	0.954261
FBgn0010423	TpnC47D	6.7669	2.15492	1.42497	1.51226	0.130469	0.55744
FBgn0010424	TpnC73F	215.202	-0.0748172	0.186278	-0.401644	0.687946	0.94548
FBgn0010431	mtrm	3.16187	1.05935	1.22557	0.864374	0.387383	NA
FBgn0010433	ato	4.83291	-0.787718	0.966843	-0.814732	0.415226	NA
FBgn0010434	cora	11205.1	-0.0314871	0.0788329	-0.399415	0.689587	0.94548
FBgn0010435	emp	13444.4	-0.0359173	0.100434	-0.357622	0.720626	0.950884
FBgn0010438	mtSSB	8.95715	0.435216	0.737699	0.589964	0.555215	0.900387
FBgn0010441	pll	391.259	-0.00273468	0.1301	-0.0210199	0.98323	0.998567
FBgn0010452	trn	695.084	0.0650154	0.123458	0.52662	0.598457	0.918408
FBgn0010453	Wnt4	232.805	0.0347874	0.170825	0.203644	0.838632	0.977031
FBgn0010470	Fkbp14	2804.27	0.391473	0.234935	1.66631	0.0956522	0.484829
FBgn0010473	tutl	10549.8	0.0934405	0.146184	0.639198	0.522694	0.886117
FBgn0010482	l(2)01289	3047.06	0.328337	0.221015	1.48558	0.13739	0.570924
FBgn0010488	NAT1	13954.4	0.0205253	0.0768716	0.267008	0.789463	0.966279
FBgn0010497	dmGlut	132.866	0.258171	0.289708	0.891143	0.372853	0.807913
FBgn0010501	Dcp-1	211.001	0.141225	0.160449	0.880188	0.378758	0.811384
FBgn0010504	kermit	139.643	0.286801	0.241833	1.18595	0.235643	0.704038
FBgn0010516	wal	5922.81	0.204298	0.113239	1.80412	0.0712122	0.424488
FBgn0010520	Bka	208.961	-0.390175	0.187348	-2.08262	0.0372863	0.308968
FBgn0010531	Ccs	363.497	0.15168	0.149615	1.0138	0.310677	0.768158
FBgn0010548	Aldh-III	5548.53	0.0428708	0.0986335	0.434648	0.663818	0.936877
FBgn0010549	l(2)03659	7.28212	-1.74731	1.02651	-1.70219	0.0887195	0.468949
FBgn0010551	Phb2	2985.23	0.0295232	0.0938275	0.314654	0.753024	0.959627
FBgn0010583	dock	2538.39	-0.0487758	0.0933575	-0.522463	0.601348	0.918454
FBgn0010590	Prosbeta1	1039.12	0.210545	0.11645	1.80803	0.0706013	0.422931
FBgn0010591	Sply	2432.71	0.0693814	0.152907	0.45375	0.650009	0.931395
FBgn0010602	lwr	1490.91	0.144204	0.106058	1.35967	0.173934	0.621898
FBgn0010607	l(2)05714	302.861	-0.113606	0.194935	-0.582788	0.560036	0.90228
FBgn0010611	Hmgs	2015.97	-0.541596	0.135246	-4.00453	6.2141e-05	0.00422438
FBgn0010612	ATPsynG	5825.66	0.453143	0.199181	2.27502	0.0229044	0.236943
FBgn0010620	CG10939	1586	0.107988	0.118665	0.910022	0.362811	0.805571
FBgn0010621	CCT5	1589.13	-0.451178	0.181425	-2.48687	0.0128874	0.175446
FBgn0010622	DCTN3-p24	467.849	-0.0344083	0.151896	-0.226525	0.820793	0.972685
FBgn0010638	Sec61beta	2768.52	0.273354	0.230769	1.18454	0.236201	0.704613
FBgn0010651	MFS14	1972.58	0.341067	0.153556	2.22112	0.0263429	0.253856
FBgn0010660	Nup214	1140.96	-0.0955203	0.110394	-0.865268	0.386892	0.816936
FBgn0010741	Pfdn2	759.396	-0.0944413	0.107615	-0.877585	0.380169	0.812491
FBgn0010747	Srp54k	2084.72	0.051399	0.13676	0.375834	0.70704	0.946159
FBgn0010750	atms	689.111	-0.134487	0.124734	-1.07819	0.280948	0.745904
FBgn0010762	simj	1747.63	0.019903	0.0924634	0.215252	0.82957	0.975367
FBgn0010768	sqz	299.328	-0.128439	0.169788	-0.756467	0.449369	0.85819
FBgn0010770	ppan	301.432	-0.151475	0.169375	-0.894318	0.371152	0.807726
FBgn0010772	Xe7	6758.14	-0.227029	0.137769	-1.64789	0.0993743	0.491659
FBgn0010774	Ref1	2395.21	-0.157793	0.0943191	-1.67297	0.0943324	0.481036
FBgn0010786	l(3)02640	1606.74	-0.0899301	0.107703	-0.834986	0.403726	0.828421
FBgn0010803	TrpRS	669.157	-0.0623316	0.126456	-0.492911	0.622075	0.923535
FBgn0010808	Chchd3	2286.56	0.448921	0.156755	2.86383	0.00418546	0.0888795
FBgn0010812	unc-45	689.554	-0.196251	0.121392	-1.61667	0.105949	0.503071
FBgn0010825	Gug	4773.96	0.0143802	0.0901154	0.159575	0.873216	0.984102
FBgn0010830	l(3)04053	570.984	-0.0806095	0.134776	-0.598099	0.549774	0.898467
FBgn0010877	l(3)05822	1593.82	-0.0646743	0.105448	-0.613327	0.53966	0.895755
FBgn0010894	sinu	610.38	0.0973877	0.135598	0.718209	0.472629	0.868671
FBgn0010905	Spn	5452.41	-0.114866	0.079149	-1.45127	0.146706	0.586367
FBgn0010909	msn	5650.5	0.0194866	0.0923485	0.211012	0.832878	0.976106
FBgn0010926	l(3)07882	529.201	-0.385286	0.152169	-2.53197	0.0113424	0.161117
FBgn0011016	SsRbeta	2707.97	0.518489	0.206529	2.51049	0.0120564	0.167398
FBgn0011020	Sas-4	121.477	-0.0332832	0.209338	-0.158993	0.873675	0.984102
FBgn0011202	dia	1262.16	-0.0428793	0.0969462	-0.4423	0.658272	0.933929
FBgn0011204	cue	2774.74	-0.377584	0.173585	-2.17521	0.0296143	0.272675
FBgn0011205	fbl	768.785	0.0576086	0.150649	0.382403	0.702163	0.94548
FBgn0011206	bol	4755.56	0.0163801	0.137511	0.119119	0.905181	0.98983
FBgn0011207	pelo	913.357	-0.0395948	0.139189	-0.284468	0.776052	0.964332
FBgn0011211	blw	43680	0.624252	0.21752	2.86986	0.00410658	0.0879178
FBgn0011217	eff	5754.31	0.0708882	0.105542	0.671655	0.501803	0.88011
FBgn0011224	heph	4707.99	-0.0546971	0.0892081	-0.61314	0.539784	0.895755
FBgn0011225	jar	11167.9	0.0335494	0.0992129	0.338156	0.735246	0.954401
FBgn0011227	ox	2063.05	0.484426	0.221984	2.18226	0.0290906	0.269752
FBgn0011230	poe	13096	0.0210218	0.114481	0.183628	0.854306	0.979168
FBgn0011232	scat	818.077	0.0296654	0.0995454	0.298009	0.765697	0.962051
FBgn0011236	ken	747.669	-0.113652	0.135572	-0.838309	0.401857	0.82718
FBgn0011244	Hsp60B	0.363367	-1.98509	3.87611	-0.512134	0.608557	NA
FBgn0011259	Sema1a	2567.92	-0.077483	0.0962917	-0.80467	0.42101	0.841798
FBgn0011260	Sema2a	1515.87	-0.0499131	0.15873	-0.314454	0.753176	0.959627
FBgn0011270	Pglym87	0.300546	-1.76981	4.04919	-0.437078	0.662055	NA
FBgn0011272	RpL13	34604.3	-0.16725	0.162854	-1.02699	0.304426	0.763418
FBgn0011274	Dif	4269.42	0.0218864	0.1211	0.180729	0.85658	0.980096
FBgn0011276	HLH3B	29.2982	-0.342198	0.379876	-0.900815	0.367687	0.807303
FBgn0011277	HLH4C	12.5094	0.483788	0.630885	0.766839	0.443177	0.854718
FBgn0011278	lbe	1.30825	-0.58816	2.02827	-0.289981	0.771831	NA
FBgn0011279	Obp69a	11.1545	-0.195129	0.82134	-0.237575	0.812211	0.970708
FBgn0011280	Obp19d	17013.3	-0.42003	0.161118	-2.60697	0.00913474	0.142309
FBgn0011281	Obp83a	7.1654	0.23325	0.855163	0.272755	0.785042	0.965858
FBgn0011283	Obp28a	193.492	2.19265	0.77004	2.84745	0.00440716	0.0915448
FBgn0011284	RpS4	44111.2	-0.136145	0.15522	-0.877109	0.380428	0.812568
FBgn0011286	RyR	9868.13	0.0564088	0.123665	0.456141	0.648288	0.931395
FBgn0011288	Snap25	5654.15	0.0144216	0.146258	0.098604	0.921453	0.992014
FBgn0011289	TfIIA-L	1614.89	0.0390153	0.126075	0.309461	0.756971	0.960712
FBgn0011290	Taf12	905.58	0.0366859	0.130051	0.282088	0.777876	0.964332
FBgn0011291	Taf11	165.713	-0.0917854	0.182379	-0.503268	0.614776	0.921823
FBgn0011293	a10	3.84341	-1.24579	1.04717	-1.18968	0.234173	NA
FBgn0011294	a5	0.469779	-0.803705	3.60104	-0.223187	0.82339	NA
FBgn0011296	l(2)efl	1436.15	0.341076	0.191001	1.78573	0.0741437	0.43029
FBgn0011297	Alg3	297.08	0.0955806	0.205176	0.465847	0.641325	0.929375
FBgn0011300	babo	3472.68	-0.0220545	0.0860852	-0.256194	0.797801	0.96869
FBgn0011305	Rsf1	1655.85	-0.0197897	0.114179	-0.173321	0.862399	0.982101
FBgn0011327	Uch-L5	389.583	0.359143	0.14006	2.56422	0.0103409	0.15334
FBgn0011335	vers	501.186	0.109202	0.138348	0.789332	0.429918	0.844748
FBgn0011336	Stt3B	3175.28	0.253236	0.173939	1.45589	0.145424	0.584999
FBgn0011361	ND-ACP	3358.75	0.526129	0.217103	2.4234	0.0153758	0.192369
FBgn0011455	ND-SGDH	4047.09	0.321707	0.133249	2.41433	0.0157642	0.194972
FBgn0011474	PR-Set7	682.086	0.0249775	0.133719	0.186791	0.851825	0.979103
FBgn0011476	l(3)neo43	241.415	0.155304	0.211527	0.734204	0.462824	0.865017
FBgn0011481	Ssdp	2641.36	-0.0264849	0.0972477	-0.272344	0.785357	0.965858
FBgn0011509	SrpRbeta	721.686	-0.120982	0.173459	-0.697466	0.485511	0.873819
FBgn0011555	thetaTry	0.747074	-1.66722	2.66114	-0.626508	0.530982	NA
FBgn0011559	Acp36DE	0.75823	-3.07572	3.8015	-0.809081	0.418469	NA
FBgn0011566	Smyd3	370.065	0.244628	0.141739	1.72591	0.0843637	0.459523
FBgn0011569	can	9.1283	0.171118	0.74832	0.228669	0.819126	0.972161
FBgn0011570	cpb	844.687	0.0946018	0.112846	0.838329	0.401846	0.82718
FBgn0011573	Cdc37	689.79	-0.0160551	0.12007	-0.133715	0.893628	0.988009
FBgn0011581	Ms	4059.88	-0.370809	0.176085	-2.10585	0.035217	0.300348
FBgn0011582	Dop1R1	1480.4	-0.0169055	0.173303	-0.0975487	0.922291	0.992182
FBgn0011584	Trp1	5413.58	0.104809	0.135854	0.771487	0.440418	0.852747
FBgn0011586	e(r)	1205.34	0.0714715	0.109971	0.649916	0.515747	0.883739
FBgn0011589	Elk	1450.58	-0.0573731	0.112607	-0.509499	0.610402	0.920132
FBgn0011591	fng	892.39	0.0738041	0.191438	0.385524	0.699849	0.94548
FBgn0011592	fra	910.041	-0.0295407	0.108507	-0.272246	0.785433	0.965858
FBgn0011596	fzo	7.72667	-0.577833	0.848276	-0.681185	0.495754	0.878321
FBgn0011603	ine	1989.37	0.155607	0.124763	1.24722	0.212318	0.676433
FBgn0011604	Iswi	1303.12	-0.215918	0.134361	-1.60699	0.108056	0.507055
FBgn0011606	Klp3A	59.2222	0.162855	0.309297	0.526533	0.598518	0.918408
FBgn0011638	La	1899.59	-0.286187	0.136824	-2.09164	0.0364703	0.305455
FBgn0011640	lark	2248.68	-0.0649883	0.123052	-0.528137	0.597404	0.918171
FBgn0011642	Zyx	2867.83	-0.148769	0.112677	-1.32031	0.18673	0.640313
FBgn0011648	Mad	1269.07	-0.0156421	0.11433	-0.136816	0.891177	0.988009
FBgn0011653	mas	0.304591	1.72075	4.04659	0.425235	0.670666	NA
FBgn0011655	Med	1119.42	-0.00380509	0.113474	-0.0335326	0.97325	0.997695
FBgn0011656	Mef2	3308.52	-0.0244081	0.0872096	-0.279879	0.77957	0.964332
FBgn0011659	Mlh1	65.3951	-0.144997	0.293499	-0.494027	0.621287	0.923391
FBgn0011660	Pms2	118.294	0.0386822	0.202057	0.191442	0.848179	0.978683
FBgn0011661	Moe	10704	0.0228982	0.0817274	0.280178	0.779341	0.964332
FBgn0011666	msi	2969.03	-0.148519	0.10191	-1.45736	0.145018	0.583919
FBgn0011672	Mvl	2181.91	-0.130068	0.100781	-1.2906	0.196842	0.652134
FBgn0011674	insc	295.145	-0.205059	0.150302	-1.36431	0.17247	0.619837
FBgn0011676	Nos	1356.44	-0.045045	0.10442	-0.431383	0.66619	0.937084
FBgn0011692	pav	3.53302	-0.20514	1.09544	-0.187267	0.851451	NA
FBgn0011693	Pdh	9434.24	0.472411	0.103718	4.55476	5.24448e-06	0.000603346
FBgn0011695	EbpIII	31053.4	0.0338461	0.0977342	0.346307	0.729112	0.953538
FBgn0011701	repo	1284.73	-0.134256	0.125856	-1.06675	0.286086	0.749278
FBgn0011703	RnrL	101.787	1.03589	0.234008	4.42672	9.56765e-06	0.00100954
FBgn0011704	RnrS	161.137	1.05289	0.273817	3.84522	0.000120445	0.00685296
FBgn0011705	rost	2409.95	0.0556949	0.243174	0.229034	0.818843	0.972075
FBgn0011706	rpr	49.8047	-0.217029	0.335437	-0.647004	0.517629	0.883849
FBgn0011708	Syx5	1776.85	0.116735	0.115327	1.01221	0.311437	0.768851
FBgn0011710	43709	649.604	-0.00928418	0.117647	-0.0789156	0.9371	0.993729
FBgn0011715	Snr1	588.974	0.0162787	0.121944	0.133493	0.893803	0.988009
FBgn0011722	Tig	6565.34	0.53955	0.105599	5.10943	3.2314e-07	7.19778e-05
FBgn0011723	byn	34.2227	0.239011	0.395844	0.603801	0.545976	0.897444
FBgn0011725	twin	1484.24	-0.0435857	0.112024	-0.389075	0.697221	0.94548
FBgn0011726	tsr	2868.84	0.0471433	0.13121	0.359297	0.719373	0.950884
FBgn0011737	Wee1	967.255	-0.0875499	0.101787	-0.860128	0.389718	0.818787
FBgn0011739	wts	2830.78	0.130028	0.0860917	1.51034	0.130956	0.558087
FBgn0011740	alpha-Man-IIa	1104.79	0.000236502	0.124362	0.00190172	0.998483	0.999704
FBgn0011741	Arp6	464.356	-0.0798642	0.127491	-0.62643	0.531033	0.889988
FBgn0011742	Arp2	1670.45	-0.0576739	0.103674	-0.556298	0.578007	0.910575
FBgn0011743	Arp53D	1.12484	1.12413	2.4659	0.45587	0.648483	NA
FBgn0011745	Arp1	1552.04	0.0512179	0.110501	0.463508	0.643001	0.929776
FBgn0011746	ana	361.019	0.115326	0.138668	0.831674	0.405593	0.829571
FBgn0011747	Ank	9430.5	-0.199269	0.12738	-1.56436	0.117732	0.532184
FBgn0011754	PhKgamma	4697.02	0.268765	0.127727	2.10421	0.0353599	0.300717
FBgn0011758	B-H1	162.97	0.409671	0.17487	2.34272	0.0191439	0.219275
FBgn0011760	ctp	12023.9	0.0998825	0.150318	0.664475	0.506387	0.882692
FBgn0011761	dhd	1.59327	0.857386	2.28477	0.375261	0.707466	NA
FBgn0011762	DNApol-alpha50	81.5123	0.473082	0.2499	1.89309	0.0583461	0.385622
FBgn0011763	Dp	1981.14	-0.116152	0.0989523	-1.17382	0.240466	0.711926
FBgn0011766	E2f1	2301.93	-0.135454	0.126926	-1.06719	0.285885	0.749278
FBgn0011768	Fdh	2364.38	0.19136	0.159827	1.1973	0.231191	0.698102
FBgn0011769	Fdx1	172.547	0.241527	0.191429	1.2617	0.207055	0.668216
FBgn0011770	Gip	1738.23	0.89737	0.252708	3.55101	0.00038375	0.0156933
FBgn0011771	Hem	1087.01	-0.0249647	0.122636	-0.203567	0.838692	0.977031
FBgn0011774	Irbp	259.986	-0.237144	0.168362	-1.40854	0.158972	0.60169
FBgn0011785	BRWD3	2599.07	-0.00764071	0.0982145	-0.0777962	0.93799	0.993729
FBgn0011787	mRpL12	510.528	0.157828	0.116109	1.35931	0.174048	0.621942
FBgn0011802	Gem3	208.637	-0.0229373	0.172534	-0.132943	0.894238	0.988009
FBgn0011812	Lcp1Psi	3.30398	0.281323	1.06979	0.262971	0.792573	NA
FBgn0011817	nmo	1638.26	0.031517	0.131365	0.23992	0.810392	0.97055
FBgn0011818	oaf	886.238	-0.00050122	0.108947	-0.0046006	0.996329	0.999692
FBgn0011822	Pgcl	0.60174	-1.38667	2.77169	-0.500297	0.616866	NA
FBgn0011824	CG4038	472.926	-0.217855	0.158665	-1.37305	0.169735	0.615113
FBgn0011826	Pp2B-14D	3234.71	-0.0234733	0.095023	-0.247027	0.804887	0.970132
FBgn0011828	Pxn	4189.92	0.0189324	0.119729	0.158127	0.874357	0.984102
FBgn0011829	Ret	173.213	0.1271	0.200131	0.635085	0.525373	0.887938
FBgn0011836	Taf2	451.404	-0.245612	0.164256	-1.4953	0.134835	0.565089
FBgn0011837	Tis11	2410.69	-0.00646253	0.211918	-0.0304955	0.975672	0.998277
FBgn0011845	tRNA:Asp-GTC-1-11	0.558427	0.907898	3.42788	0.264857	0.79112	NA
FBgn0011859	tRNA:Gly-GCC-1-1	5.35356	-1.21765	1.10077	-1.10617	0.268652	NA
FBgn0011861	tRNA:Gly-GCC-1-3	0.304591	1.72075	4.04659	0.425235	0.670666	NA
FBgn0011871	tRNA:Gly-GCC-1-12	0.704586	-0.064336	2.39761	-0.0268334	0.978593	NA
FBgn0011872	tRNA:Gly-GCC-1-13	0.320885	-0.0425559	4.06807	-0.010461	0.991654	NA
FBgn0011878	tRNA:His-GTG-1-4	0.552946	0.888886	3.436	0.258698	0.795868	NA
FBgn0011881	tRNA:Ile-AAT-1-3	0.301195	-0.042556	4.08047	-0.0104292	0.991679	NA
FBgn0011883	tRNA:Ile-AAT-1-5	0.321534	1.78791	4.02712	0.443968	0.657066	NA
FBgn0011884	tRNA:Ile-AAT-1-6	0.753386	-1.80217	2.56818	-0.701731	0.482847	NA
FBgn0011891	tRNA:Lys-CTT-1-1	0.324275	1.79839	4.01656	0.447744	0.654338	NA
FBgn0011892	tRNA:Lys-CTT-1-6	4.75601	-0.285239	0.941943	-0.30282	0.762027	NA
FBgn0011893	tRNA:Lys-CTT-1-7	2.38238	0.676268	1.50216	0.450196	0.652569	NA
FBgn0011894	tRNA:Lys-CTT-1-8	3.63332	0.990707	1.22919	0.805981	0.420254	NA
FBgn0011895	tRNA:Lys-CTT-1-9	5.64386	0.652187	0.821739	0.793667	0.427389	NA
FBgn0011905	tRNA:Lys-TTT-2-5	0.343959	1.87301	4.03281	0.464443	0.64233	NA
FBgn0011909	tRNA:Leu-CAA-2-1	0.446698	-2.32016	4.00619	-0.579143	0.562492	NA
FBgn0011916	tRNA:Met-CAT-1-2	1.82086	-3.24748	2.07777	-1.56297	0.118061	NA
FBgn0011919	tRNA:Met-CAT-1-5	10.3871	-0.153867	0.649856	-0.236771	0.812835	0.970763
FBgn0011953	tRNA:Arg-TCG-1-1	0.60174	-1.38667	2.77169	-0.500297	0.616866	NA
FBgn0011954	tRNA:Arg-TCG-2-2	2.04277	-1.16782	1.50421	-0.776364	0.437534	NA
FBgn0011955	tRNA:Arg-ACG-1-5	0.62208	0.0397432	2.44839	0.0162324	0.987049	NA
FBgn0011957	tRNA:Arg-ACG-1-2	1.31312	0.666027	1.6324	0.408004	0.683271	NA
FBgn0011958	tRNA:Arg-ACG-1-1	0.428935	-2.2029	4.01447	-0.54874	0.583184	NA
FBgn0011966	tRNA:Arg-TCG-2-3	3.30872	-0.960152	1.15871	-0.828636	0.407311	NA
FBgn0011982	tRNA:Ser-AGA-2-1	0.495605	0.908794	3.56161	0.255163	0.798597	NA
FBgn0011985	tRNA:Ser-AGA-2-3	1.13435	-1.33537	1.87616	-0.71176	0.476613	NA
FBgn0011987	tRNA:SeC-TCA-1-1	0.297799	-1.76085	4.04973	-0.434807	0.663702	NA
FBgn0011993	tRNA:Thr-AGT-1-5	0.467038	-0.80362	3.60794	-0.222737	0.823741	NA
FBgn0011994	tRNA:Thr-AGT-1-6	0.636277	0.123949	3.30456	0.0375085	0.97008	NA
FBgn0012009	tRNA:Val-AAC-2-4	3.37797	-0.349771	1.27588	-0.274141	0.783976	NA
FBgn0012026	tRNA:Tyr-GTA-1-6	0.758879	-1.80145	3.14931	-0.572014	0.567312	NA
FBgn0012028	tRNA:Tyr-GTA-1-4	0.428935	-2.2029	4.01447	-0.54874	0.583184	NA
FBgn0012034	AcCoAS	21587.1	0.784618	0.228722	3.43044	0.000602608	0.0229408
FBgn0012036	Aldh	28330.5	0.588864	0.150502	3.91267	9.12813e-05	0.0057223
FBgn0012037	Ance	1417.6	0.15945	0.0946227	1.68511	0.0919671	0.47382
FBgn0012042	AttA	157.159	-0.996758	0.464707	-2.14492	0.0319593	0.284365
FBgn0012051	CalpA	2723.51	-0.00404553	0.0860984	-0.0469873	0.962523	0.996091
FBgn0012058	Cdc27	1232.6	-0.137587	0.111553	-1.23338	0.217435	0.682147
FBgn0012344	Dh44	1957.96	-0.104113	0.109091	-0.954367	0.339898	0.789477
FBgn0013263	Trl	227.794	0.0330634	0.187818	0.176039	0.860263	0.981178
FBgn0013269	Fkbp39	912.626	-0.185369	0.167793	-1.10475	0.269269	0.738533
FBgn0013272	Gp150	18326.2	-0.000392478	0.110821	-0.00354154	0.997174	0.999704
FBgn0013275	Hsp70Aa	399.101	-0.187532	0.180668	-1.03799	0.299274	0.760065
FBgn0013276	Hsp70Ab	404.729	-0.163844	0.182671	-0.896936	0.369753	0.807726
FBgn0013277	Hsp70Ba	232.912	-0.0576681	0.163645	-0.352397	0.724541	0.952427
FBgn0013278	Hsp70Bb	288.52	-0.0313972	0.159356	-0.197025	0.843808	0.978045
FBgn0013279	Hsp70Bc	296.848	-0.151318	0.153977	-0.982732	0.325739	0.780381
FBgn0013303	Nca	2027.96	-0.0404873	0.125931	-0.321504	0.747829	0.958714
FBgn0013305	Nmda1	6728.67	-0.0112975	0.0965852	-0.116969	0.906885	0.98983
FBgn0013307	Odc1	4049.92	-0.164514	0.139158	-1.18222	0.23712	0.705429
FBgn0013308	Odc2	287.243	-0.386843	0.254822	-1.51809	0.128992	0.555368
FBgn0013323	Ptth	109.19	-1.45339	0.457111	-3.17951	0.00147525	0.042901
FBgn0013325	RpL11	27355.3	-0.253185	0.163831	-1.5454	0.122249	0.542504
FBgn0013334	Sap47	24667	0.15403	0.167383	0.92023	0.357453	0.802452
FBgn0013342	nSyb	28942.6	0.00287264	0.0913157	0.0314584	0.974904	0.998145
FBgn0013343	Syx1A	2343.07	0.0851474	0.145025	0.587122	0.557122	0.90133
FBgn0013347	TfIIA-S	1032.4	0.0501329	0.158109	0.317078	0.751185	0.959389
FBgn0013348	TpnC41C	254.587	1.40243	0.680477	2.06095	0.0393074	0.319814
FBgn0013432	bcn92	630.128	-0.162011	0.140006	-1.15717	0.247202	0.717879
FBgn0013433	beat-Ia	494.37	0.00611825	0.127683	0.0479175	0.961782	0.996091
FBgn0013435	Cdc2rk	284.524	-0.0640962	0.137314	-0.466787	0.640652	0.929375
FBgn0013467	igl	5874.53	0.10903	0.13751	0.792889	0.427843	0.843874
FBgn0013469	klu	145.934	-0.243666	0.270533	-0.900686	0.367755	0.807303
FBgn0013531	MED20	98.7194	0.0143221	0.255415	0.0560737	0.955283	0.99573
FBgn0013548	l(2)dtl	202.909	-0.0692267	0.188733	-0.366797	0.713771	0.949246
FBgn0013563	Pex1	523.536	0.426678	0.152644	2.79525	0.0051859	0.102207
FBgn0013576	mtd	16196.8	0.030306	0.0892601	0.339524	0.734215	0.954261
FBgn0013717	not	451.231	0.0257861	0.136475	0.188943	0.850137	0.979103
FBgn0013718	nuf	4340.21	-0.135214	0.106329	-1.27165	0.203497	0.66207
FBgn0013720	pck	628.452	-0.0307677	0.135693	-0.226745	0.820622	0.972685
FBgn0013725	phyl	740.517	-0.0368235	0.128697	-0.286125	0.774782	0.964332
FBgn0013726	pnut	1855.71	0.0735999	0.0946376	0.777703	0.436744	0.848603
FBgn0013732	sced	359.029	0.0500736	0.149099	0.33584	0.736992	0.954502
FBgn0013733	shot	36750.3	-0.0604548	0.122131	-0.495002	0.620599	0.923167
FBgn0013746	alien	1164.58	0.0805929	0.157027	0.513243	0.607781	0.919223
FBgn0013749	Arf102F	1518.75	0.0188246	0.109389	0.172088	0.863368	0.98218
FBgn0013750	Arf51F	2043.97	0.0322152	0.133752	0.240858	0.809665	0.97055
FBgn0013751	Awh	148.64	-0.0143199	0.217504	-0.0658372	0.947507	0.99463
FBgn0013753	Bgb	823.453	0.147125	0.161529	0.910831	0.362385	0.805186
FBgn0013755	Bro	1.16449	3.6387	2.65444	1.3708	0.170438	NA
FBgn0013756	Mtor	2195.43	-0.00276106	0.0937255	-0.029459	0.976499	0.998277
FBgn0013759	CASK	8267.05	-0.031293	0.10425	-0.300172	0.764046	0.96195
FBgn0013762	Cdk5	562.453	-0.00436796	0.122789	-0.035573	0.971623	0.997695
FBgn0013763	Idgf6	22384.4	0.118928	0.210067	0.566141	0.571298	0.90854
FBgn0013764	Chi	1094.71	0.0778881	0.110164	0.707021	0.479553	0.871358
FBgn0013765	cnn	2366.31	0.112072	0.105966	1.05763	0.290226	0.753566
FBgn0013767	Crz	888.066	-0.291964	0.193613	-1.50798	0.13156	0.558087
FBgn0013770	Cp1	17261.7	0.0799392	0.100365	0.796486	0.42575	0.842963
FBgn0013771	Cyp6a9	1709.77	0.139738	0.11493	1.21585	0.224042	0.690426
FBgn0013772	Cyp6a8	97.4588	0.038866	0.381303	0.101929	0.918813	0.990878
FBgn0013773	Cyp6a22	745.78	0.314505	0.207777	1.51367	0.13011	0.557105
FBgn0013799	Deaf1	1782.56	-0.00945376	0.110935	-0.0852186	0.932088	0.993472
FBgn0013810	Dhc36C	88.6798	-0.515881	0.296831	-1.73796	0.0822172	0.452411
FBgn0013811	Dhc62B	98.6078	-0.488269	0.381338	-1.28041	0.200402	0.658095
FBgn0013812	Dhc93AB	151.282	0.341278	0.32149	1.06155	0.28844	0.752475
FBgn0013813	Dhc98D	99.3787	-0.0335311	0.235623	-0.142308	0.886837	0.987131
FBgn0013949	Elal	3863.09	0.593713	0.202005	2.9391	0.00329168	0.0750775
FBgn0013953	Esp	266.026	0.398243	0.198001	2.01131	0.0442925	0.338683
FBgn0013954	Fkbp12	5321.49	0.1908	0.149236	1.27851	0.201071	0.658522
FBgn0013972	Gycalpha99B	3706.63	0.0824494	0.149239	0.552466	0.580629	0.911055
FBgn0013973	Gycbeta100B	2212.67	-0.0553389	0.107763	-0.513524	0.607584	0.919191
FBgn0013981	His4r	10173.7	-0.140221	0.129323	-1.08427	0.278246	0.744965
FBgn0013983	imd	638.112	0.0995492	0.147928	0.672958	0.500974	0.879536
FBgn0013987	MAPk-Ak2	2266.79	-0.0370335	0.102115	-0.362664	0.716856	0.950033
FBgn0013995	Calx	7975.84	0.0288124	0.14631	0.196927	0.843885	0.978045
FBgn0013997	Nrx-IV	2631.63	0.126368	0.143187	0.882539	0.377485	0.811384
FBgn0014000	Hf	3855.15	-0.0312762	0.161275	-0.193931	0.84623	0.978311
FBgn0014002	Pdi	14141.8	0.286053	0.227892	1.25521	0.209401	0.673036
FBgn0014006	Ask1	1836.65	-0.0665854	0.0927478	-0.717919	0.472808	0.868847
FBgn0014007	Ptp69D	1196.81	-0.0132011	0.1014	-0.130188	0.896417	0.988009
FBgn0014009	Rab2	3829.56	0.0413289	0.128721	0.321072	0.748156	0.958714
FBgn0014010	Rab5	8690.58	-0.165246	0.112135	-1.47364	0.140579	0.575128
FBgn0014011	Rac2	1433.14	0.0506385	0.16477	0.307328	0.758594	0.961174
FBgn0014018	Rel	4359.53	-0.33828	0.112421	-3.00903	0.0026208	0.0664337
FBgn0014019	Rh5	7737.58	0.161881	0.0916445	1.7664	0.0773282	0.439867
FBgn0014020	Rho1	8180.52	0.00388667	0.14822	0.0262223	0.97908	0.998567
FBgn0014022	Rlb1	231.42	0.0513967	0.186573	0.275478	0.782949	0.965794
FBgn0014023	mRpL47	429.659	0.00314381	0.139426	0.0225482	0.982011	0.998567
FBgn0014024	Rnp4F	1175.94	-0.0842776	0.115277	-0.731089	0.464725	0.865683
FBgn0014026	RpL7A	51381.9	-0.19378	0.154397	-1.25507	0.209452	0.673036
FBgn0014028	SdhB	5102.2	0.28612	0.153232	1.86724	0.0618682	0.394761
FBgn0014029	43710	886.214	0.0247492	0.107015	0.231267	0.817107	0.971538
FBgn0014031	Spat	6613.74	0.314289	0.175817	1.7876	0.0738413	0.429469
FBgn0014032	Sptr	753.111	0.302464	0.12882	2.34797	0.0188763	0.217956
FBgn0014033	Sr-CI	1041.4	-0.123086	0.21617	-0.569394	0.569089	0.907179
FBgn0014037	Su(Tpl)	4289.21	-0.0234569	0.0848585	-0.276424	0.782223	0.965511
FBgn0014073	Tie	1129.69	0.112921	0.113172	0.997785	0.318384	0.775081
FBgn0014075	Uggt	2341.78	0.186763	0.107975	1.72969	0.0836848	0.456538
FBgn0014076	Vm32E	0.964288	-2.12678	2.51634	-0.845188	0.398006	NA
FBgn0014092	CG4278	247.493	0.286518	0.150046	1.90954	0.0561922	0.377893
FBgn0014127	barr	230.959	-0.116456	0.156876	-0.742346	0.457877	0.861708
FBgn0014133	bif	8697.25	0.07034	0.0921572	0.763261	0.445308	0.856515
FBgn0014135	bnl	266.535	-0.237479	0.179666	-1.32178	0.186242	0.639845
FBgn0014141	cher	4013.68	-0.186616	0.140987	-1.32364	0.185622	0.639637
FBgn0014143	croc	66.3714	0.280923	0.295873	0.949472	0.342381	0.790348
FBgn0014163	fax	6832.53	0.270266	0.169023	1.59899	0.109823	0.511631
FBgn0014179	gcm	6.2341	1.39933	0.930678	1.50356	0.132695	NA
FBgn0014184	Oda	26446.5	-0.0073038	0.119637	-0.0610496	0.95132	0.995135
FBgn0014189	Hel25E	1975.02	-0.146606	0.14342	-1.02222	0.306679	0.765851
FBgn0014269	prod	644.255	-0.0646996	0.128603	-0.503094	0.614898	0.921823
FBgn0014340	mof	274.381	-0.202875	0.17522	-1.15783	0.246933	0.717696
FBgn0014342	mia	62.5572	-0.337182	0.321287	-1.04947	0.29396	0.757625
FBgn0014343	mirr	389.378	-0.0929128	0.135618	-0.685107	0.493276	0.877892
FBgn0014366	noi	516.605	0.0451907	0.149934	0.301403	0.763107	0.961484
FBgn0014368	nol	16.3387	0.231784	0.515038	0.450033	0.652686	0.93232
FBgn0014380	RhoL	417.128	0.206893	0.180747	1.14465	0.252352	0.724428
FBgn0014388	sty	1508.9	-0.0614722	0.108997	-0.563981	0.572767	0.909161
FBgn0014391	sun	3806.54	0.417195	0.215793	1.93331	0.0531977	0.370258
FBgn0014395	tilB	20.2365	-0.780628	0.615313	-1.26867	0.204559	0.663602
FBgn0014396	tim	3824.62	1.03966	0.547513	1.89888	0.0575801	0.38322
FBgn0014411	Vps26	1610.31	0.0379938	0.109315	0.347562	0.728169	0.953292
FBgn0014417	CG13397	839.201	0.0935997	0.118411	0.790463	0.429257	0.84445
FBgn0014427	CG11899	3375.99	0.71155	0.182831	3.89185	9.94832e-05	0.00598558
FBgn0014454	Acp1	12055.5	9.39152	2.14499	4.37836	NA	NA
FBgn0014455	Ahcy	2604.81	-0.14749	0.280058	-0.526641	0.598443	0.918408
FBgn0014464	Cp7Fa	82.874	-0.751191	0.394891	-1.90228	0.0571351	0.381228
FBgn0014465	Cp7Fb	48.5028	-1.06862	0.357234	-2.99139	0.00277714	0.0680771
FBgn0014466	Cp7Fc	16.4101	-1.4699	0.614246	-2.39302	0.0167105	0.202714
FBgn0014469	Cyp4e2	3415.39	0.0654069	0.147904	0.442224	0.658327	0.933929
FBgn0014857	His3.3A	3034.23	0.0459148	0.116292	0.394824	0.692973	0.94548
FBgn0014859	Hr38	1201.3	-1.0612	0.253463	-4.1868	2.82916e-05	0.00235067
FBgn0014861	Mcm2	70.3476	0.842347	0.286029	2.94497	0.00322983	0.0743145
FBgn0014863	Mlp84B	10647.4	0.812149	0.518785	1.56548	0.11747	0.531564
FBgn0014865	Mtk	432.181	-0.698452	0.955985	-0.730609	0.465018	0.865683
FBgn0014868	Ost48	1583.92	0.361651	0.143384	2.52227	0.0116602	0.163465
FBgn0014869	Pglym78	7857.89	0.629246	0.212392	2.96267	0.00304985	0.072241
FBgn0014870	Psi	3336.62	-0.230027	0.111505	-2.06293	0.0391194	0.319116
FBgn0014877	Roe1	733.717	-0.00368801	0.126389	-0.0291798	0.976721	0.998277
FBgn0014879	Set	641.906	-0.0589541	0.123082	-0.478981	0.631952	0.928178
FBgn0014906	Hydr2	2531.3	0.00941231	0.0840036	0.112046	0.910787	0.990554
FBgn0014930	CG2846	1102.68	0.292256	0.153758	1.90075	0.0573349	0.382038
FBgn0014931	CG2678	98.1026	0.364874	0.305755	1.19335	0.232731	0.700639
FBgn0014949	btn	0.492865	0.895079	2.97999	0.300363	0.7639	NA
FBgn0015000	betaggt-I	467.361	0.0726863	0.144728	0.502228	0.615507	0.921823
FBgn0015001	iotaTry	0.902935	-0.975772	2.49172	-0.391606	0.695349	NA
FBgn0015010	Ag5r	13.0579	-0.140375	0.566409	-0.247833	0.804264	0.970132
FBgn0015011	AhcyL2	535.612	0.351894	0.168983	2.08242	0.0373039	0.308968
FBgn0015019	CCT3	1326.49	-0.295461	0.139678	-2.1153	0.034404	0.296374
FBgn0015024	CkIalpha	8455.04	0.0681002	0.112386	0.605948	0.54455	0.89742
FBgn0015025	CkIIalpha-i1	102.783	0.28054	0.232031	1.20906	0.226639	0.693176
FBgn0015031	cype	4407.86	0.466786	0.19995	2.33452	0.0195685	0.221902
FBgn0015032	Cyp4c3	230.537	0.372942	0.380638	0.979782	0.327194	0.780846
FBgn0015033	Cyp4d8	426.028	0.0376354	0.187548	0.200671	0.840956	0.977458
FBgn0015034	Cyp4e1	338.866	-0.0617033	0.19391	-0.318206	0.750329	0.959237
FBgn0015035	Cyp4e3	638.519	-0.405833	0.254148	-1.59684	0.110302	0.512768
FBgn0015036	Cyp4ae1	1.93324	-0.954051	1.52874	-0.624076	0.532578	NA
FBgn0015037	Cyp4p1	1706.44	-0.602567	0.144254	-4.17713	2.95212e-05	0.00236067
FBgn0015038	Cyp9b1	795.074	-0.39885	0.135483	-2.94392	0.00324087	0.0743521
FBgn0015039	Cyp9b2	4166.86	0.20064	0.207071	0.968943	0.332574	0.783347
FBgn0015075	Ddx1	523.492	0.117897	0.144523	0.815769	0.414632	0.836536
FBgn0015218	eIF4E1	5538.77	0.10199	0.0943929	1.08049	0.279924	0.745843
FBgn0015221	Fer2LCH	15751.9	0.116702	0.124569	0.936847	0.348837	0.795938
FBgn0015222	Fer1HCH	13912.8	0.122156	0.108517	1.12568	0.260301	0.729806
FBgn0015229	glec	1449.35	-0.16533	0.122798	-1.34635	0.17819	0.630604
FBgn0015239	Hr78	1154.29	-0.0638662	0.10365	-0.616172	0.537781	0.89465
FBgn0015240	Hr96	892.993	-0.0636296	0.11607	-0.548199	0.583556	0.911491
FBgn0015245	Hsp60A	9234.82	-0.155873	0.108782	-1.43289	0.151888	0.592032
FBgn0015247	Diap2	2412.43	-0.0245096	0.0934767	-0.2622	0.793167	0.967119
FBgn0015268	Nap1	42.2928	-0.674573	0.407615	-1.65493	0.0979395	0.488484
FBgn0015269	Nf1	4581.38	-0.0699896	0.116442	-0.601068	0.547795	0.898225
FBgn0015270	Orc2	10.6304	2.61034	0.746502	3.49676	0.000470944	0.018535
FBgn0015271	Orc5	37.9761	0.821514	0.347054	2.36711	0.0179277	0.211529
FBgn0015277	Pi3K59F	1479.48	-0.0300174	0.113262	-0.265026	0.79099	0.966607
FBgn0015278	Pi3K68D	1953.91	0.158126	0.0930283	1.69977	0.0891751	0.469372
FBgn0015279	Pi3K92E	1698.16	0.0247627	0.0984303	0.251576	0.801369	0.969527
FBgn0015282	Rpt2	1911.35	0.171924	0.11575	1.48531	0.137463	0.570924
FBgn0015283	Rpn10	1760.95	0.209922	0.0866151	2.42362	0.0153667	0.192369
FBgn0015286	Rala	1219.07	0.0311092	0.136453	0.227985	0.819658	0.972382
FBgn0015288	RpL22	16172	-0.0323636	0.129151	-0.250587	0.802133	0.969609
FBgn0015295	Shark	406.798	-0.0122636	0.12713	-0.0964656	0.923151	0.992347
FBgn0015296	Shc	580.312	-0.0163755	0.115019	-0.142373	0.886786	0.987131
FBgn0015298	Srp19	407.601	-0.14728	0.167166	-0.88104	0.378296	0.811384
FBgn0015299	Ssb-c31a	313.931	-0.0798177	0.171764	-0.464695	0.64215	0.929701
FBgn0015300	Ssl	4.33108	0.579759	1.24108	0.467142	0.640398	NA
FBgn0015316	Try29F	26.6462	-0.401768	0.416937	-0.963619	0.335237	0.786023
FBgn0015320	Ubc2	841.157	-0.000882558	0.127338	-0.00693083	0.99447	0.999242
FBgn0015321	Ubc4	1330.83	0.104754	0.123396	0.848931	0.395919	0.824071
FBgn0015331	abs	626.904	0.0855928	0.124072	0.689866	0.490278	0.876939
FBgn0015336	CG15865	7.31848	-1.79255	0.822134	-2.18036	0.0292305	0.270569
FBgn0015338	CG5861	732.778	0.198025	0.109663	1.80577	0.070955	0.423747
FBgn0015351	CG14906	92.7339	0.0065246	0.277891	0.023479	0.981268	0.998567
FBgn0015359	CG2034	343.505	0.208171	0.143727	1.44838	0.147511	0.586504
FBgn0015360	oxt	1014.06	0.0255181	0.121285	0.210398	0.833357	0.976322
FBgn0015371	chn	5973.24	-0.0592134	0.0805559	-0.73506	0.462303	0.864568
FBgn0015372	RabX1	578.914	-0.115173	0.125124	-0.920472	0.357326	0.802452
FBgn0015376	cutlet	102.668	0.214611	0.216747	0.990147	0.322102	0.776721
FBgn0015379	dod	320.739	0.0174782	0.158509	0.110266	0.912198	0.990878
FBgn0015380	drl	851.792	-0.059028	0.120257	-0.490848	0.623534	0.92396
FBgn0015381	dsf	25.2788	0.238249	0.456601	0.521788	0.601818	0.918454
FBgn0015391	glu	291.877	0.162661	0.159458	1.02008	0.307689	0.766329
FBgn0015393	hoip	483.252	-0.378336	0.213282	-1.77388	0.0760838	0.436929
FBgn0015396	jumu	216.278	-0.349737	0.18541	-1.88629	0.0592555	0.388445
FBgn0015399	kek1	1695.26	0.00489141	0.109525	0.0446602	0.964378	0.996091
FBgn0015400	kek2	1551.45	-0.153131	0.110033	-1.39168	0.16402	0.607401
FBgn0015402	ksr	1349.4	0.0892324	0.107654	0.828881	0.407172	0.830807
FBgn0015477	Rme-8	2324.31	-0.0766571	0.113139	-0.677548	0.498058	0.878497
FBgn0015509	Cul1	4504.18	0.104201	0.0977204	1.06632	0.286279	0.749278
FBgn0015513	mbc	5100.37	-0.0869868	0.0848416	-1.02528	0.305229	0.764094
FBgn0015519	nAChRalpha3	1085.83	0.0151783	0.117146	0.129568	0.896908	0.988009
FBgn0015520	nonA-l	508.02	0.00923117	0.124555	0.0741134	0.94092	0.994002
FBgn0015521	RpS21	8128.38	-0.260832	0.169428	-1.53948	0.123686	0.544571
FBgn0015522	olf186-M	1329.78	0.233447	0.232299	1.00494	0.314925	0.771198
FBgn0015524	otp	153.157	0.239556	0.183401	1.30619	0.191489	0.646515
FBgn0015527	peng	781.234	-0.28188	0.164016	-1.71861	0.0856848	0.463105
FBgn0015543	snoRNA:Me28S-A1322	50.4889	-0.00657692	0.314602	-0.0209056	0.983321	0.998567
FBgn0015544	spag	344.931	-0.085772	0.14233	-0.60263	0.546755	0.897922
FBgn0015546	spel1	650.602	0.0440812	0.115641	0.38119	0.703062	0.94548
FBgn0015550	tap	1.1229	-1.38609	2.0587	-0.673285	0.500766	NA
FBgn0015553	tos	143.568	0.117794	0.213695	0.551226	0.581479	0.911166
FBgn0015558	tty	4771.98	0.0194373	0.0874019	0.22239	0.82401	0.973977
FBgn0015561	unpg	3.5611	-0.515875	1.00944	-0.511051	0.609315	NA
FBgn0015568	alpha-Est1	2440.55	0.083699	0.119308	0.701535	0.482969	0.873764
FBgn0015569	alpha-Est10	591.777	-0.206439	0.170222	-1.21276	0.22522	0.69185
FBgn0015570	alpha-Est2	2137.63	0.634613	0.254321	2.49532	0.0125844	0.172895
FBgn0015571	alpha-Est3	0.304591	1.72075	4.04659	0.425235	0.670666	NA
FBgn0015572	alpha-Est4	44.9307	0.121598	0.314973	0.386058	0.699454	0.94548
FBgn0015574	alpha-Est6	3.61992	0.197491	1.06044	0.186236	0.85226	NA
FBgn0015575	alpha-Est7	12148.7	0.192962	0.128466	1.50205	0.133083	0.561711
FBgn0015576	alpha-Est8	4030.78	0.462787	0.123161	3.75757	0.00017157	0.00893613
FBgn0015577	alpha-Est9	2735.83	-0.132093	0.113462	-1.16421	0.24434	0.716589
FBgn0015582	dare	293.651	0.152558	0.158375	0.963271	0.335411	0.786028
FBgn0015584	Acp53Ea	2.82308	-0.863555	1.60618	-0.537645	0.590822	NA
FBgn0015585	Acp63F	6.6483	0.403849	1.00686	0.401099	0.688347	NA
FBgn0015586	Acp76A	0.338478	1.85279	4.03456	0.459229	0.64607	NA
FBgn0015589	Apc	5150.28	-0.0616543	0.109622	-0.562428	0.573825	0.909473
FBgn0015591	AstA	1198.34	-0.278285	0.189939	-1.46513	0.142885	0.579975
FBgn0015600	toc	5299.27	-0.0214602	0.0840871	-0.255213	0.798558	0.968951
FBgn0015602	BEAF-32	711.868	-0.108342	0.112293	-0.964821	0.334634	0.785358
FBgn0015609	CadN	4989.82	-0.00173795	0.104331	-0.016658	0.986709	0.998774
FBgn0015614	CanB2	1939.43	0.0863151	0.143895	0.599847	0.548608	0.898225
FBgn0015615	SMC3	1266.99	0.0246115	0.101289	0.242983	0.808019	0.97055
FBgn0015618	Cdk8	114.804	0.271566	0.205027	1.32454	0.185325	0.639248
FBgn0015621	Clp	111.649	-0.018913	0.245407	-0.0770677	0.93857	0.993729
FBgn0015622	Cnx99A	10079.8	0.393354	0.100321	3.92095	8.82009e-05	0.00559621
FBgn0015623	Cpr	8140.82	0.110428	0.108776	1.01519	0.310016	0.767633
FBgn0015625	CycB3	30.0026	0.147848	0.389701	0.379387	0.7044	0.9455
FBgn0015663	Ugt36A1	356.71	0.258695	0.174471	1.48274	0.138143	0.571925
FBgn0015664	Dref	1002.24	-0.139118	0.101917	-1.36501	0.17225	0.619837
FBgn0015714	Cyp6a17	1457.33	-0.10219	0.132644	-0.770409	0.441057	0.852904
FBgn0015721	ktub	221.937	-0.074926	0.1776	-0.42188	0.673113	0.940005
FBgn0015737	Hmu	3302.7	0.0827232	0.139573	0.592686	0.553391	0.900387
FBgn0015754	Lis-1	6132.67	0.0278913	0.0964199	0.289269	0.772375	0.963881
FBgn0015756	RpL9	30877.2	-0.12129	0.142886	-0.848857	0.395961	0.824071
FBgn0015765	p38a	294.017	-0.124703	0.170298	-0.732266	0.464006	0.865683
FBgn0015766	Msr-110	49155.3	0.0644001	0.08354	0.770889	0.440773	0.852747
FBgn0015772	Nak	5021.46	0.0348409	0.0794175	0.438705	0.660875	0.935449
FBgn0015773	NetA	120.54	-0.278563	0.208033	-1.33903	0.180561	0.632394
FBgn0015774	NetB	2051.76	-0.0681858	0.101751	-0.670122	0.50278	0.880444
FBgn0015776	nrv1	5571.7	0.0690517	0.110438	0.625254	0.531805	0.890509
FBgn0015777	nrv2	9508.61	0.577479	0.240756	2.39861	0.0164576	0.20081
FBgn0015778	rin	3795.71	-0.108158	0.104445	-1.03556	0.30041	0.760444
FBgn0015781	P5cr	615.116	0.188924	0.109615	1.72353	0.0847931	0.460425
FBgn0015789	Rab10	3191.58	-0.0475176	0.109794	-0.432789	0.665168	0.937084
FBgn0015790	Rab11	4778.08	0.10257	0.0940138	1.09101	0.275267	0.741768
FBgn0015791	Rab14	2585.65	-0.0349137	0.123002	-0.283847	0.776528	0.964332
FBgn0015793	Rab19	561.413	0.00941724	0.144139	0.0653344	0.947908	0.99463
FBgn0015794	Rab18	1349.15	-0.195308	0.104627	-1.8667	0.061943	0.394761
FBgn0015795	Rab7	6329.93	-0.229588	0.112773	-2.03585	0.0417656	0.330245
FBgn0015797	Rab6	1388.63	0.0324585	0.121979	0.266099	0.790163	0.966279
FBgn0015799	Rbf	1155.59	-0.0879719	0.126117	-0.697541	0.485464	0.873819
FBgn0015801	Reg-5	3109.94	-0.0362391	0.129172	-0.280549	0.779057	0.964332
FBgn0015803	RtGEF	1360.21	-0.129542	0.0954729	-1.35685	0.17483	0.623822
FBgn0015805	HDAC1	942.741	0.148881	0.131905	1.1287	0.259024	0.729153
FBgn0015808	ScpX	2746.52	0.0639613	0.135403	0.472377	0.636658	0.92928
FBgn0015818	Spx	264.859	-0.0758195	0.150797	-0.502792	0.615111	0.921823
FBgn0015828	TfIIEalpha	521.69	-0.0145624	0.141313	-0.103051	0.917923	0.990878
FBgn0015829	TfIIEbeta	494.912	0.0743818	0.141493	0.525694	0.599101	0.918446
FBgn0015831	Rtnl2	3.35387	-0.562009	1.26666	-0.443694	0.657264	NA
FBgn0015834	eIF3i	4357.81	-0.0378087	0.103123	-0.366637	0.71389	0.949284
FBgn0015838	Vang	475.625	-0.089573	0.146665	-0.610733	0.541376	0.896783
FBgn0015872	Drip	1041.42	0.0757918	0.16757	0.452299	0.651054	0.931557
FBgn0015903	apt	511.019	0.19761	0.170873	1.15647	0.247489	0.718108
FBgn0015904	ara	133.146	-0.0300919	0.184368	-0.163216	0.870348	0.984028
FBgn0015905	ast	313.603	-0.188542	0.193991	-0.971909	0.331096	0.78267
FBgn0015919	caup	188.727	-0.00321812	0.204236	-0.0157569	0.987428	0.998774
FBgn0015924	crq	4361.86	0.00907883	0.119772	0.075801	0.939577	0.993729
FBgn0015925	csul	220.427	0.0406464	0.183666	0.221306	0.824854	0.973977
FBgn0015926	dah	4.2988	-1.43295	1.21808	-1.1764	0.239435	NA
FBgn0015929	dpa	142.784	0.560997	0.228896	2.45089	0.0142505	0.184868
FBgn0015946	grim	2.05585	-1.72629	1.88401	-0.916287	0.359516	NA
FBgn0015949	hrg	3363.66	-0.135008	0.0927555	-1.45552	0.145524	0.585058
FBgn0016013	Faa	905.48	0.289708	0.193138	1.5	0.133613	0.562511
FBgn0016031	lama	3003.74	0.134645	0.103237	1.30423	0.192154	0.6469
FBgn0016032	lbm	321.308	0.254315	0.150654	1.68808	0.0913962	0.473208
FBgn0016034	mael	41.7873	-0.181624	0.32946	-0.551279	0.581443	0.911166
FBgn0016036	mei-P22	5.6808	0.166711	0.98837	0.168672	0.866054	NA
FBgn0016038	Vsp37A	1280.95	-0.0913014	0.0969507	-0.94173	0.346331	0.793378
FBgn0016041	Tom40	1950.94	-0.029386	0.133454	-0.220195	0.825719	0.973977
FBgn0016047	nompA	254.32	0.0189934	0.18362	0.103439	0.917615	0.990878
FBgn0016053	pgc	2.42596	0.983742	1.40476	0.700294	0.483744	NA
FBgn0016054	phr6-4	67.881	-0.652783	0.281692	-2.31736	0.0204839	0.225647
FBgn0016059	Sema1b	2549.19	0.0151664	0.0945151	0.160466	0.872514	0.984102
FBgn0016061	side	2059.6	0.0474904	0.116415	0.407941	0.683317	0.943692
FBgn0016070	smg	2074.42	0.0967219	0.123434	0.783591	0.43328	0.846112
FBgn0016075	vkg	8042.01	0.698281	0.2727	2.56062	0.0104485	0.154423
FBgn0016076	vri	2723.55	0.320762	0.203217	1.57843	0.114468	0.524466
FBgn0016078	wun	1242.33	0.0264112	0.12276	0.215146	0.829653	0.975367
FBgn0016080	xmas	55.4584	0.330719	0.319145	1.03626	0.300079	0.760444
FBgn0016081	fry	10339	-0.211497	0.109454	-1.93229	0.0533238	0.370258
FBgn0016119	ATPsynCF6	6162.75	0.469636	0.197792	2.37439	0.0175781	0.209257
FBgn0016120	ATPsynD	7741.28	0.548001	0.187579	2.92144	0.00348419	0.0780522
FBgn0016122	Acer	10352.9	-0.00572028	0.167021	-0.0342489	0.972679	0.997695
FBgn0016123	Alp4	2042.71	0.240858	0.173473	1.38844	0.165002	0.608622
FBgn0016126	CaMKI	14399.3	-0.135392	0.147492	-0.917963	0.358638	0.802752
FBgn0016131	Cdk4	446.883	0.45874	0.223322	2.05416	0.0399598	0.322883
FBgn0016641	PTP-ER	2407.19	-0.054487	0.101833	-0.535062	0.592607	0.914235
FBgn0016650	Lgr1	1045.53	-0.134279	0.113442	-1.18368	0.23654	0.704706
FBgn0016660	H15	52.0754	-0.053369	0.295366	-0.180688	0.856613	0.980096
FBgn0016672	Ipp	7797.81	-0.138479	0.097608	-1.41873	0.155978	0.598212
FBgn0016675	Lectin-galC1	5.93578	0.23002	0.923512	0.249071	0.803306	NA
FBgn0016684	NaPi-T	26.6051	0.184128	0.483387	0.380912	0.703268	0.94548
FBgn0016685	Nlp	1474.83	-0.22141	0.176244	-1.25627	0.209018	0.672468
FBgn0016687	Nurf-38	5538.24	0.162399	0.155299	1.04572	0.29569	0.758133
FBgn0016691	ATPsynO	7591.62	0.676743	0.226017	2.99421	0.00275156	0.067924
FBgn0016693	Past1	2408.47	0.122453	0.133072	0.920198	0.357469	0.802452
FBgn0016694	Pdp1	8457.08	0.227925	0.188929	1.20641	0.227661	0.694736
FBgn0016696	Pitslre	14413.8	-0.188542	0.111095	-1.69713	0.0896726	0.470065
FBgn0016697	Prosalpha5	1004.35	0.135258	0.127831	1.0581	0.290011	0.753308
FBgn0016698	Ptpa	538.486	0.0182504	0.112459	0.162286	0.871081	0.984102
FBgn0016701	Rab4	2305.81	0.00337373	0.102781	0.0328245	0.973815	0.997736
FBgn0016715	Reg-2	1110.42	0.729276	0.250953	2.90602	0.00366053	0.0806781
FBgn0016726	RpL29	12332.5	-0.251121	0.171805	-1.46166	0.143835	0.581209
FBgn0016754	sba	2350.36	-0.0634167	0.110999	-0.571329	0.567777	0.906797
FBgn0016756	Usp47	6256.74	-0.146525	0.0882489	-1.66036	0.0968423	0.486255
FBgn0016762	angel	184.621	0.214102	0.172885	1.23841	0.215564	0.680356
FBgn0016794	dos	927.541	-0.101897	0.107161	-0.950873	0.341669	0.790304
FBgn0016797	fz2	4366.6	0.1512	0.168562	0.896997	0.369721	0.807726
FBgn0016917	Stat92E	12338	0.394251	0.205574	1.9178	0.0551361	0.375988
FBgn0016919	nompB	235.922	-0.110865	0.156313	-0.70925	0.47817	0.871133
FBgn0016920	nompC	173.284	-0.107854	0.181098	-0.595558	0.55147	0.899606
FBgn0016926	Pino	7130.83	-0.255142	0.0975244	-2.61618	0.00889188	0.140618
FBgn0016930	Dyrk2	2664.4	-0.0227199	0.130567	-0.17401	0.861858	0.981872
FBgn0016970	l(2)k10201	81.0176	0.323026	0.236044	1.3685	0.171157	0.617499
FBgn0016974	swaPsi	4.15341	-0.319309	1.08074	-0.295454	0.767647	NA
FBgn0016977	spen	12782.3	-0.078554	0.125096	-0.627952	0.530035	0.889583
FBgn0016978	snRNP-U1-70K	1834.97	-0.117018	0.112169	-1.04323	0.296841	0.758133
FBgn0016983	smid	2110.25	-0.0451404	0.128005	-0.352646	0.724354	0.952427
FBgn0016984	sktl	1448.17	-0.0108384	0.100642	-0.107693	0.914239	0.990878
FBgn0017414	cag	269.71	0.11472	0.158239	0.724979	0.468465	0.867221
FBgn0017418	ari-1	3673.6	0.130732	0.11417	1.14507	0.252182	0.724428
FBgn0017429	CG5989	813.294	0.248472	0.118174	2.10259	0.0355016	0.300945
FBgn0017430	Nelf-E	346.265	0.0634583	0.138861	0.45699	0.647678	0.931395
FBgn0017448	CG2187	1.8294	-0.760916	1.83915	-0.413733	0.67907	NA
FBgn0017456	Ubc84D	35.4255	0.0244341	0.358096	0.0682334	0.9456	0.99463
FBgn0017457	U2af38	509.62	-0.117519	0.164681	-0.713615	0.475465	0.869914
FBgn0017482	T3dh	324.418	-0.0944983	0.235473	-0.401312	0.68819	0.94548
FBgn0017545	RpS3A	42884.8	-0.200433	0.128181	-1.56367	0.117895	0.532232
FBgn0017550	Rga	1452.59	0.147861	0.0961014	1.53859	0.123904	0.545021
FBgn0017551	Rca1	244.835	0.0864619	0.165331	0.522962	0.601	0.918454
FBgn0017556	Prosalpha4T2	5.42283	-1.15925	1.0098	-1.148	0.250968	NA
FBgn0017558	Pdk	7941.46	0.232034	0.18792	1.23475	0.216924	0.681211
FBgn0017561	Ork1	1962.38	-0.442265	0.179623	-2.46218	0.0138095	0.180527
FBgn0017566	ND-75	11123.6	0.228567	0.134534	1.69896	0.0893273	0.469372
FBgn0017567	ND-23	3277.42	0.217143	0.145288	1.49457	0.135026	0.565436
FBgn0017572	Mo25	2090.6	-0.15832	0.0995178	-1.59087	0.111638	0.516229
FBgn0017577	Mcm5	56.1046	1.39211	0.330874	4.20739	2.58341e-05	0.00216366
FBgn0017578	Max	488.452	0.00563462	0.130968	0.0430228	0.965683	0.996292
FBgn0017579	RpL14	29593.9	-0.0976433	0.150855	-0.647267	0.517459	0.883849
FBgn0017581	Lk6	42931.8	-0.322202	0.164399	-1.95988	0.0500098	0.35983
FBgn0017590	klg	2364.04	-0.0157174	0.119386	-0.131653	0.895259	0.988009
FBgn0019624	COX5A	10528.9	0.495768	0.212459	2.33347	0.0196235	0.222095
FBgn0019643	AANAT1	3620.93	0.466953	0.21793	2.14268	0.0321392	0.285129
FBgn0019644	ATPsynB	9849.02	0.486311	0.206891	2.35057	0.0187449	0.217321
FBgn0019650	toy	2622.68	-0.10512	0.0953202	-1.10281	0.270111	0.739538
FBgn0019660	lncRNA:roX2	4.68135	-0.0219247	0.948185	-0.0231228	0.981552	NA
FBgn0019661	lncRNA:roX1	121.253	-0.442312	0.401592	-1.1014	0.270723	0.739914
FBgn0019662	qm	2277.24	0.00912606	0.120615	0.0756628	0.939687	0.993729
FBgn0019686	lok	170.421	-0.227889	0.235969	-0.96576	0.334164	0.784739
FBgn0019809	gcm2	8.11671	-0.595409	0.751078	-0.792739	0.42793	0.843874
FBgn0019828	dj	0.472531	-0.821094	3.5965	-0.228304	0.81941	NA
FBgn0019830	colt	2966.02	-0.0288654	0.153198	-0.188419	0.850548	0.979103
FBgn0019890	Smg5	5130.04	-0.0678411	0.0914101	-0.742162	0.457989	0.861708
FBgn0019925	Surf4	3357.01	0.160723	0.154281	1.04175	0.297526	0.758597
FBgn0019928	Ser8	1.72817	3.12587	1.90773	1.63853	0.101311	NA
FBgn0019929	Ser7	2303.08	0.204487	0.130372	1.56849	0.116768	0.530057
FBgn0019932	SamDC	1216.36	0.168769	0.169773	0.994086	0.320181	0.775377
FBgn0019936	RpS20	17336	-0.270381	0.19034	-1.42052	0.155457	0.597241
FBgn0019938	RpI1	791.453	-0.369279	0.145189	-2.54343	0.0109771	0.158925
FBgn0019940	Rh6	7119.81	-0.0895866	0.123297	-0.72659	0.467477	0.866821
FBgn0019949	Cdk9	430.82	0.140138	0.150008	0.934205	0.350198	0.796832
FBgn0019952	Orct	1549.05	-0.00281597	0.183356	-0.015358	0.987747	0.998774
FBgn0019957	ND-42	4655.42	0.475944	0.211408	2.2513	0.0243664	0.24481
FBgn0019960	Mitofilin	5474.73	0.187063	0.121374	1.54122	0.123264	0.544521
FBgn0019968	Khc-73	6743.66	0.00809283	0.0958993	0.0843888	0.932747	0.993472
FBgn0019972	Drice	422.358	0.345751	0.194847	1.77448	0.0759842	0.436836
FBgn0019982	Gs1l	2003.83	0.268847	0.145192	1.85167	0.0640736	0.40252
FBgn0019985	mGluR	2033.09	-0.17205	0.116633	-1.47514	0.140176	0.575128
FBgn0019990	Gcn2	1166.87	-0.0965945	0.128796	-0.749981	0.453266	0.859957
FBgn0020018	Ppox	320.984	0.230248	0.135094	1.70435	0.0883148	0.468949
FBgn0020224	Cbl	2195.51	0.00981557	0.087214	0.112546	0.910391	0.990554
FBgn0020235	ATPsyngamma	9787.74	0.654747	0.227962	2.87217	0.0040766	0.0874548
FBgn0020236	ATPCL	11020.4	0.380698	0.198159	1.92118	0.0547096	0.375085
FBgn0020238	14-3-3epsilon	16864.4	0.131729	0.117235	1.12363	0.26117	0.731216
FBgn0020248	stet	41.3713	-0.22996	0.460626	-0.499235	0.617614	0.922157
FBgn0020249	stck	2642.76	-0.0912381	0.0874058	-1.04385	0.296557	0.758133
FBgn0020251	sfl	2096.26	0.200307	0.0998659	2.00576	0.0448821	0.339634
FBgn0020255	Ran	3456.85	-0.0198801	0.120955	-0.16436	0.869448	0.983792
FBgn0020257	Ppa	944.277	0.133267	0.110769	1.2031	0.228937	0.69667
FBgn0020258	ppk	79.9014	0.0462512	0.247431	0.186926	0.851719	0.979103
FBgn0020261	pcm	1483.8	0.0449974	0.100752	0.446615	0.655153	0.933019
FBgn0020269	mspo	1262.29	0.00225854	0.121158	0.0186413	0.985127	0.998677
FBgn0020270	mre11	306.336	-0.1844	0.150184	-1.22783	0.219511	0.684761
FBgn0020272	mst	187.518	-0.205141	0.1813	-1.1315	0.257846	0.728579
FBgn0020277	lush	20.899	-0.0258609	0.561557	-0.0460522	0.963269	0.996091
FBgn0020278	loco	996.901	0.213496	0.120502	1.77172	0.0764415	0.437573
FBgn0020279	lig	6341.38	0.00697176	0.0916033	0.0761082	0.939333	0.993729
FBgn0020294	ko	935.047	-0.00156091	0.146264	-0.0106719	0.991485	0.998774
FBgn0020299	stumps	1475.41	0.237528	0.13959	1.70161	0.088828	0.468949
FBgn0020300	geko	305.12	-0.0674596	0.174099	-0.387478	0.698402	0.94548
FBgn0020304	drongo	5918.07	-0.132538	0.0799247	-1.65828	0.0972603	0.487419
FBgn0020305	dbe	331.15	-0.238608	0.144515	-1.65109	0.0987197	0.490041
FBgn0020306	dom	7715.95	-0.452294	0.164419	-2.75086	0.00594398	0.111175
FBgn0020307	dve	542.425	-0.172757	0.11998	-1.43988	0.1499	0.589458
FBgn0020309	crol	5852.59	-0.0201333	0.0770324	-0.261361	0.793814	0.967322
FBgn0020312	Tmtc3	954.867	-0.0499273	0.126606	-0.394352	0.693321	0.94548
FBgn0020369	Rpt6	1404.88	0.097836	0.0903482	1.08288	0.278863	0.745483
FBgn0020370	TppII	2669.19	0.0841506	0.0846375	0.994247	0.320103	0.775377
FBgn0020372	TM4SF	5512.02	0.585215	0.236166	2.47798	0.0132129	0.17734
FBgn0020376	Sr-CIII	0.301195	-0.042556	4.08047	-0.0104292	0.991679	NA
FBgn0020377	Sr-CII	0.926015	0.0414767	2.13536	0.0194237	0.984503	NA
FBgn0020378	Sp1	229.856	0.164397	0.176625	0.93077	0.351973	0.798314
FBgn0020379	Rfx	1108.31	0.25449	0.104345	2.43893	0.0147307	0.18761
FBgn0020381	Dredd	746.88	-0.0501378	0.119632	-0.419099	0.675144	0.940562
FBgn0020385	pug	9034.5	1.20797	0.280181	4.31139	1.62234e-05	0.00151645
FBgn0020386	Pdk1	5286.14	-0.219019	0.10186	-2.1502	0.0315391	0.282751
FBgn0020388	Gcn5	1530.83	-0.0715508	0.0987625	-0.724474	0.468775	0.867221
FBgn0020389	Papss	1809.84	0.538494	0.143759	3.74581	0.000179814	0.00922263
FBgn0020391	Nrk	251.794	0.0945906	0.193739	0.488238	0.625382	0.924461
FBgn0020392	Nmt	574.933	0.1554	0.149025	1.04278	0.297051	0.758133
FBgn0020399	Mst89B	3.81835	-0.381542	1.02208	-0.3733	0.708925	NA
FBgn0020407	asun	207.318	0.199677	0.186791	1.06899	0.285076	0.749112
FBgn0020412	JIL-1	1904.06	0.04688	0.0868225	0.539952	0.58923	0.912829
FBgn0020414	Idgf3	3715.7	-0.188001	0.131688	-1.42763	0.153398	0.59423
FBgn0020415	Idgf2	8452.08	-0.0118022	0.167883	-0.0703004	0.943955	0.994273
FBgn0020416	Idgf1	4061.29	-0.150337	0.152526	-0.985647	0.324306	0.779243
FBgn0020429	GluRIIB	5.43307	-1.47632	1.05177	-1.40366	0.16042	NA
FBgn0020440	Fak	2143.23	-0.0713076	0.0971255	-0.73418	0.462839	0.865017
FBgn0020443	eRF3	2721.51	-0.0348196	0.156184	-0.22294	0.823583	0.973977
FBgn0020445	E23	372.195	0.10881	0.157051	0.692834	0.488414	0.875371
FBgn0020493	Dad	1604.9	-0.0961376	0.0976656	-0.984355	0.324941	0.779857
FBgn0020496	CtBP	5735.69	0.0443574	0.116075	0.382146	0.702353	0.94548
FBgn0020497	emb	3139.08	-0.137238	0.130533	-1.05136	0.293092	0.756877
FBgn0020503	CLIP-190	11846.1	-0.0924154	0.0835554	-1.10604	0.268711	0.737842
FBgn0020506	Amyrel	1.04844	-2.37239	2.43865	-0.972829	0.330638	NA
FBgn0020508	Ag5r2	1.50094	-0.346599	2.24558	-0.154348	0.877336	NA
FBgn0020509	Acp62F	0.954416	0.145408	2.96151	0.0490994	0.96084	NA
FBgn0020510	Abi	1017.9	-0.00532312	0.0993576	-0.0535754	0.957273	0.996085
FBgn0020513	Paics	15121.1	1.09279	0.458064	2.38568	0.0170478	0.205614
FBgn0020518	snoRNA:Me28S-G764	0.816208	-1.91295	2.23916	-0.854315	0.39293	NA
FBgn0020521	pio	5074.35	0.323805	0.223437	1.4492	0.147282	0.586504
FBgn0020545	kraken	1337.33	-0.395643	0.140551	-2.81493	0.00487871	0.0976582
FBgn0020616	SA	1015.2	-0.17911	0.117176	-1.52855	0.126376	0.549888
FBgn0020617	Rx	173.154	0.144951	0.174774	0.829363	0.406899	0.830797
FBgn0020618	Rack1	43474.5	-0.0306228	0.151205	-0.202525	0.839506	0.977035
FBgn0020620	RN-tre	2053.6	0.0116102	0.0904827	0.128314	0.8979	0.988009
FBgn0020621	Pkn	9341.36	-0.123978	0.122485	-1.01219	0.311447	0.768851
FBgn0020622	Pi3K21B	821.188	0.0613659	0.132513	0.463094	0.643297	0.929776
FBgn0020626	Osbp	2343.03	0.0578512	0.10521	0.549863	0.582414	0.911491
FBgn0020633	Mcm7	9.23521	2.16919	1.2989	1.67002	0.0949146	0.48236
FBgn0020637	Lcp65Ag2	91.4856	-0.326356	0.293682	-1.11126	0.266458	0.735415
FBgn0020638	Lcp65Ag1	31.2766	0.0856008	0.385535	0.222031	0.82429	0.973977
FBgn0020639	Lcp65Af	0.456886	2.30128	4.00082	0.575202	0.565155	NA
FBgn0020641	Lcp65Ad	1.80455	2.04587	1.86781	1.09533	0.273374	NA
FBgn0020642	Lcp65Ac	40.6865	1.435	0.459973	3.11975	0.00181005	0.0498669
FBgn0020647	KrT95D	4323.73	-0.0113193	0.107148	-0.105642	0.915866	0.990878
FBgn0020653	Trxr-1	4002.94	0.034241	0.113022	0.30296	0.761921	0.961174
FBgn0020655	ArfGAP1	1399.18	0.0267467	0.111497	0.239888	0.810417	0.97055
FBgn0020660	eIF4B	5606.09	-0.185932	0.163694	-1.13585	0.256018	0.727245
FBgn0020762	Atet	4867.77	-0.255604	0.110312	-2.31711	0.0204977	0.225647
FBgn0020764	Alas	2681.66	0.177729	0.123156	1.44312	0.148987	0.587778
FBgn0020765	Acp65Aa	76.813	5.64785	2.02246	2.79256	NA	NA
FBgn0020767	Spred	3726.08	0.00807274	0.102348	0.0788756	0.937132	0.993729
FBgn0020880	CG7179	0.819231	0.711117	3.09131	0.230037	0.818063	NA
FBgn0020887	Su(z)12	1302.17	0.0513997	0.100927	0.509276	0.610559	0.920132
FBgn0020906	Jon25Bi	0.297799	-1.76085	4.04973	-0.434807	0.663702	NA
FBgn0020907	Scp2	4147.26	0.291193	0.169399	1.71898	0.0856184	0.463105
FBgn0020908	Scp1	270.383	1.1318	0.418093	2.70704	0.00678852	0.120456
FBgn0020909	Rtc1	264.269	-0.176529	0.182048	-0.969679	0.332207	0.782951
FBgn0020910	RpL3	49910.6	-0.103859	0.164743	-0.630428	0.528415	0.889339
FBgn0020912	Ptx1	136.016	0.0740772	0.188613	0.392746	0.694507	0.94548
FBgn0020930	Dgkepsilon	1638.02	0.129498	0.0972694	1.33133	0.183081	0.635552
FBgn0021738	Crg-1	552.642	-0.260029	0.174669	-1.48869	0.136568	0.569161
FBgn0021742	C901	18.4493	-0.346419	0.50521	-0.685692	0.492907	0.877892
FBgn0021750	SerRS-m	374.175	-0.194011	0.134505	-1.4424	0.149189	0.588159
FBgn0021760	chb	2251.12	-0.119397	0.0977208	-1.22181	0.221778	0.687124
FBgn0021761	Nup154	762.667	-0.259693	0.117019	-2.21923	0.0264709	0.254009
FBgn0021764	sdk	1878.24	0.0271864	0.118205	0.229993	0.818097	0.971727
FBgn0021765	scu	5216.12	-0.106525	0.183991	-0.578971	0.562609	0.903757
FBgn0021767	org-1	1.61126	-3.01831	1.87434	-1.61033	0.107325	NA
FBgn0021768	nudC	495.486	0.0865243	0.171634	0.504121	0.614176	0.92176
FBgn0021776	mira	31.6315	-0.383949	0.41674	-0.921314	0.356886	0.802374
FBgn0021795	Tapdelta	2250.76	0.295453	0.220434	1.34032	0.18014	0.632327
FBgn0021796	Tor	1978.52	-0.0708974	0.10853	-0.653252	0.513594	0.883739
FBgn0021800	Reph	3237.36	-0.0887815	0.0944189	-0.940293	0.347067	0.794044
FBgn0021814	Vps28	989.069	-0.0373962	0.165172	-0.226408	0.820884	0.972685
FBgn0021818	cnk	1293.71	0.00237471	0.0953507	0.024905	0.980131	0.998567
FBgn0021825	DCTN2-p50	1349.9	0.145239	0.116571	1.24592	0.212792	0.676687
FBgn0021847	Ttc7	2076.31	-0.067747	0.0954753	-0.709577	0.477967	0.871133
FBgn0021856	l(2)k14505	595.672	0.187844	0.150137	1.25115	0.210881	0.674777
FBgn0021872	Xbp1	12154.7	-0.0642133	0.11287	-0.568912	0.569416	0.907476
FBgn0021874	Nle	392.008	-0.406533	0.176043	-2.30928	0.020928	0.227726
FBgn0021875	Zfrp8	265.121	-0.195467	0.178149	-1.09721	0.272549	0.740737
FBgn0021895	ytr	1462.05	-0.175506	0.179793	-0.976158	0.328986	0.781545
FBgn0021906	RFeSP	7432.24	0.388942	0.159619	2.43669	0.0148224	0.188362
FBgn0021944	Coprox	424.075	0.0096342	0.150636	0.063957	0.949004	0.99463
FBgn0021967	ND-PDSW	3096.81	0.264818	0.139792	1.89437	0.0581765	0.385231
FBgn0021979	l(2)k09913	8914.51	0.0755699	0.116184	0.650432	0.515413	0.883739
FBgn0021995	Rs1	762.407	-0.282849	0.139019	-2.03461	0.0418903	0.330489
FBgn0022023	eIF3h	4664.57	-0.00748584	0.114191	-0.0655553	0.947732	0.99463
FBgn0022027	Vps25	499.805	-0.0778152	0.13221	-0.588573	0.556148	0.900908
FBgn0022029	l(2)k01209	1205.71	-0.443798	0.129911	-3.41618	0.000635069	0.0237202
FBgn0022069	Nnp-1	896.629	-0.426094	0.138049	-3.08655	0.00202495	0.053942
FBgn0022097	Vha36-1	3879.04	0.127251	0.112813	1.12798	0.259329	0.729619
FBgn0022153	l(2)k05819	1702.98	-0.0589239	0.108198	-0.544595	0.586032	0.911886
FBgn0022160	Gpo1	6686.55	0.250551	0.233635	1.0724	0.283538	0.748525
FBgn0022213	Cse1	750.034	-0.136236	0.142321	-0.957244	0.338444	0.788598
FBgn0022224	ubl	242.048	0.0288502	0.174043	0.165765	0.868342	0.983432
FBgn0022238	lolal	3332.42	-0.037485	0.161237	-0.232483	0.816163	0.9714
FBgn0022288	l(2)09851	526.786	-0.392436	0.154391	-2.54184	0.0110272	0.158925
FBgn0022338	dnk	234.908	0.0920974	0.157165	0.585992	0.557881	0.901574
FBgn0022343	CG3760	1105.7	0.209359	0.128552	1.6286	0.103398	0.499565
FBgn0022344	CG10340	861.368	0.282998	0.141422	2.00109	0.0453827	0.341008
FBgn0022349	CG1910	2447.38	0.0891641	0.134128	0.664768	0.506199	0.882692
FBgn0022355	Tsf1	28827.4	0.161247	0.296656	0.543549	0.586752	0.911959
FBgn0022359	Sodh-2	101.334	0.854172	0.321435	2.65737	0.00787529	0.131703
FBgn0022361	Pur-alpha	3759.07	0.0186083	0.174024	0.106929	0.914845	0.990878
FBgn0022382	Pka-R2	4226.39	0.0539513	0.113873	0.473785	0.635653	0.92928
FBgn0022699	D19B	784.962	0.0117557	0.125346	0.0937858	0.925279	0.993467
FBgn0022702	Cht2	542.981	0.49693	0.274517	1.8102	0.0702653	0.422136
FBgn0022709	Adk1	1725.33	0.378578	0.224431	1.68683	0.0916357	0.473512
FBgn0022710	Ac13E	3539.41	-0.160308	0.100637	-1.59293	0.111177	0.5158
FBgn0022724	Taf8	142.05	-0.00886043	0.206311	-0.042947	0.965744	0.996292
FBgn0022740	HLH54F	1.59085	0.671706	1.84183	0.364695	0.715339	NA
FBgn0022764	Sin3A	7859.49	-0.0676957	0.102763	-0.658757	0.510052	0.883739
FBgn0022768	Pp2C1	1887.5	-0.1067	0.121216	-0.880245	0.378726	0.811384
FBgn0022770	Peritrophin-A	170.786	1.68721	0.924425	1.82515	0.0679789	0.415283
FBgn0022772	Orc1	32.4631	0.824322	0.386903	2.13057	0.033125	0.288988
FBgn0022774	Oat	1301.83	1.1765	0.205048	5.73768	9.59803e-09	4.36877e-06
FBgn0022786	Hira	336.717	0.0359557	0.143804	0.250032	0.802563	0.969763
FBgn0022787	Hel89B	3493.72	-0.0582138	0.0870895	-0.668437	0.503855	0.881051
FBgn0022800	Cad96Ca	748.687	-0.0316113	0.133615	-0.236585	0.812979	0.970763
FBgn0022893	Df31	2085.89	0.0725149	0.159302	0.455204	0.648963	0.931395
FBgn0022935	D19A	855.133	-0.0266376	0.159467	-0.167041	0.867338	0.983432
FBgn0022936	CycH	136.446	-0.0727949	0.19157	-0.379991	0.703952	0.9455
FBgn0022942	Cbp80	1090.47	0.0323987	0.120807	0.268186	0.788556	0.966189
FBgn0022943	Cbp20	345.242	0.0597791	0.152678	0.391536	0.695401	0.94548
FBgn0022959	yps	9089.8	-0.36219	0.275027	-1.31693	0.187863	0.641467
FBgn0022960	vimar	559.992	0.106617	0.14491	0.73575	0.461883	0.864091
FBgn0022981	rpk	0.304591	1.72075	4.04659	0.425235	0.670666	NA
FBgn0022984	qkr58E-3	1753.45	0.0913472	0.104911	0.870707	0.383914	0.814507
FBgn0022985	qkr58E-2	1453.23	-0.104673	0.0995585	-1.05138	0.293086	0.756877
FBgn0022986	qkr58E-1	1333.92	0.010956	0.131144	0.0835413	0.933421	0.993472
FBgn0022987	qkr54B	2150.52	-0.0917305	0.112188	-0.817652	0.413556	0.836436
FBgn0023000	mth	452.166	-0.0301847	0.172624	-0.174858	0.861192	0.981794
FBgn0023001	melt	357.307	-0.10116	0.153072	-0.660863	0.5087	0.883739
FBgn0023023	CRMP	3622.39	0.0520853	0.110716	0.470438	0.638042	0.92928
FBgn0023076	Clk	1415.67	-0.333416	0.190489	-1.75031	0.0800641	0.44619
FBgn0023081	gek	2894.87	-0.0276843	0.0872004	-0.31748	0.75088	0.959356
FBgn0023083	fray	2744.11	-0.00135408	0.0902513	-0.0150034	0.988029	0.998774
FBgn0023090	dtr	13.2168	-0.679048	0.56095	-1.21053	0.226075	0.692649
FBgn0023091	dimm	33.9117	0.265066	0.338919	0.782092	0.434161	0.846964
FBgn0023094	cyc	993.871	0.128127	0.140845	0.909702	0.36298	0.805656
FBgn0023095	caps	2811.51	-0.0236503	0.0876519	-0.269821	0.787298	0.966189
FBgn0023096	btv	151.289	0.0121111	0.194647	0.0622208	0.950387	0.994962
FBgn0023097	bon	2005.49	-0.030396	0.114763	-0.26486	0.791117	0.966607
FBgn0023129	aay	7745.55	-0.333413	0.276606	-1.20537	0.228061	0.695071
FBgn0023130	a6	388.851	-0.00300649	0.140928	-0.0213335	0.98298	0.998567
FBgn0023143	Uba1	6041.02	-0.123438	0.0974182	-1.2671	0.205121	0.664832
FBgn0023167	SmD3	426.393	-0.0138127	0.14941	-0.0924483	0.926342	0.993467
FBgn0023169	AMPKalpha	5518.25	-0.0308552	0.0804645	-0.383464	0.701376	0.94548
FBgn0023170	RpL39	12245.5	-0.191227	0.187794	-1.01828	0.308545	0.766529
FBgn0023171	rnh1	295.742	0.0534986	0.143174	0.373661	0.708657	0.946594
FBgn0023172	RhoGEF2	5280.46	0.0317755	0.0909473	0.349384	0.726801	0.95306
FBgn0023174	Prosbeta2	1341.72	0.16834	0.105782	1.59139	0.111521	0.516109
FBgn0023175	Prosalpha7	1314.59	0.00695938	0.120607	0.0577029	0.953985	0.995424
FBgn0023177	Pp4-19C	816.607	0.0517518	0.118321	0.437384	0.661833	0.936062
FBgn0023178	Pdf	1214.83	-0.0854572	0.15911	-0.537094	0.591203	0.91373
FBgn0023179	amon	6446.02	-0.0491068	0.0986749	-0.497662	0.618722	0.922393
FBgn0023180	Orc6	33.0674	0.286067	0.40479	0.706704	0.47975	0.871358
FBgn0023181	Orc4	143.998	0.124484	0.217024	0.573593	0.566243	0.90597
FBgn0023197	Jon74E	5.40249	0.882316	0.986899	0.894028	0.371307	NA
FBgn0023212	EloB	2520.03	0.109847	0.132817	0.827057	0.408205	0.831633
FBgn0023213	eIF4G1	9258.94	0.0924146	0.118656	0.778845	0.436071	0.84826
FBgn0023214	edl	170.759	-0.0176985	0.198517	-0.0891536	0.92896	0.993467
FBgn0023215	Mnt	2356.76	0.00209491	0.110513	0.0189563	0.984876	0.998677
FBgn0023216	Parg	401.548	0.0386332	0.131891	0.292918	0.769585	0.963216
FBgn0023388	Dap160	4626.85	0.01849	0.100015	0.184873	0.853329	0.979103
FBgn0023395	Chd3	4.6891	0.549945	1.01826	0.540082	0.589141	NA
FBgn0023407	B4	3716.46	-0.129932	0.0886213	-1.46615	0.142606	0.579741
FBgn0023415	Acp32CD	1.25129	-1.56504	2.29765	-0.681151	0.495776	NA
FBgn0023416	Ac3	3520.34	0.00981649	0.136322	0.0720095	0.942594	0.994273
FBgn0023441	fus	3723.03	-0.150931	0.0967406	-1.56016	0.118723	0.534583
FBgn0023458	Rbcn-3A	8570.8	0.0269965	0.126372	0.213627	0.830838	0.975583
FBgn0023477	Taldo	5988.66	0.960032	0.239204	4.01345	5.98383e-05	0.00414866
FBgn0023479	teq	29868.9	0.330487	0.163034	2.0271	0.0426525	0.332982
FBgn0023489	Pph13	1146.59	-0.0107935	0.151485	-0.0712512	0.943198	0.994273
FBgn0023495	Lip3	12.1476	-0.618447	0.611552	-1.01127	0.311885	0.769169
FBgn0023496	Lip1	9.4011	-1.36188	0.684121	-1.99071	0.0465131	0.345018
FBgn0023506	Es2	366.229	0.0495333	0.144421	0.342979	0.731614	0.953655
FBgn0023507	D2hgdh	4470.62	0.2907	0.148071	1.96325	0.0496174	0.357991
FBgn0023508	Ocrl	2137.99	-0.0409208	0.101751	-0.402165	0.687563	0.945128
FBgn0023509	mip130	709.022	0.143847	0.11217	1.2824	0.199702	0.656772
FBgn0023510	Rbcn-3B	3552.82	-0.0356599	0.0898388	-0.396931	0.691418	0.94548
FBgn0023511	Edem1	1710.39	-0.0949015	0.151168	-0.627787	0.530143	0.889583
FBgn0023512	eIF2Bepsilon	624.105	-0.138724	0.12856	-1.07906	0.280559	0.745843
FBgn0023513	CG14803	187.642	0.0205988	0.172609	0.119338	0.905008	0.98983
FBgn0023514	CG14805	790.731	0.00304563	0.118822	0.0256318	0.979551	0.998567
FBgn0023515	CG14814	67.6988	-0.125876	0.249622	-0.504268	0.614073	0.92176
FBgn0023516	Pex5	1275.14	0.0706382	0.129181	0.546818	0.584504	0.911541
FBgn0023517	Pgam5	325.316	0.122877	0.141455	0.868666	0.38503	0.815142
FBgn0023518	trr	1700.15	-0.152016	0.138126	-1.10056	0.271086	0.740339
FBgn0023519	mRpL16	331.59	0.0464372	0.138098	0.336264	0.736672	0.954502
FBgn0023520	CG3857	158.533	-0.22049	0.226498	-0.973471	0.330319	0.78223
FBgn0023521	CG3587	173.563	-0.0386752	0.184805	-0.209276	0.834233	0.976327
FBgn0023522	CG11596	604.332	-0.0548751	0.123267	-0.445173	0.656195	0.933369
FBgn0023523	Or2a	10.0535	-0.597113	0.769171	-0.776308	0.437567	0.84973
FBgn0023524	CG3078	1669.88	-0.00968407	0.108242	-0.0894666	0.928711	0.993467
FBgn0023525	CG3191	687.126	-0.00471111	0.123433	-0.0381673	0.969554	0.997695
FBgn0023526	CG2865	919.013	-0.0887788	0.113936	-0.779199	0.435863	0.84826
FBgn0023527	CG3071	584.496	-0.324858	0.164848	-1.97065	0.0487638	0.35526
FBgn0023528	CG2924	2152.53	0.000579962	0.109331	0.00530466	0.995768	0.999692
FBgn0023529	CG2918	5356.54	0.13577	0.205991	0.659108	0.509827	0.883739
FBgn0023530	CG3740	284.208	0.0357914	0.260421	0.137437	0.890685	0.988009
FBgn0023531	CG32809	6670.01	-0.109689	0.106965	-1.02547	0.305143	0.764061
FBgn0023534	CG17778	666.512	-0.177931	0.125622	-1.4164	0.156657	0.599169
FBgn0023535	arg	67.5228	0.457539	0.262646	1.74203	0.0815024	0.450025
FBgn0023536	CG3156	306.535	0.0725972	0.155912	0.465629	0.641481	0.929375
FBgn0023537	CG17896	6165.94	0.421308	0.162648	2.5903	0.00958934	0.14636
FBgn0023540	CG3630	1044.1	0.590077	0.173838	3.3944	0.000687796	0.0248294
FBgn0023542	Nmd3	1245.22	-0.160048	0.144928	-1.10433	0.26945	0.738642
FBgn0023545	PIG-K	781.179	-0.214489	0.138421	-1.54954	0.121253	0.540569
FBgn0023549	Mct1	981.878	0.112713	0.106263	1.0607	0.288827	0.752868
FBgn0023550	FarO	163.976	-0.250477	0.226509	-1.10582	0.268806	0.737842
FBgn0024150	Ac78C	779.461	-0.0191764	0.146776	-0.130651	0.896052	0.988009
FBgn0024179	wit	2160.67	-0.145353	0.105293	-1.38047	0.167443	0.611852
FBgn0024183	vig	6556.4	-0.0118476	0.0982239	-0.120618	0.903994	0.989535
FBgn0024184	unc-4	81.2904	0.277777	0.262431	1.05847	0.28984	0.753308
FBgn0024187	syd	3617.26	0.00716754	0.0921454	0.0777851	0.937999	0.993729
FBgn0024188	san	557.319	0.0461857	0.184084	0.250895	0.801896	0.969609
FBgn0024189	sns	2049.1	0.00619376	0.122283	0.0506511	0.959604	0.996091
FBgn0024191	sip1	203.049	0.123769	0.164822	0.750923	0.452699	0.859365
FBgn0024194	rasp	102.48	-0.594244	0.212654	-2.79442	0.00519932	0.102207
FBgn0024196	robl	808.633	0.0514738	0.132154	0.3895	0.696906	0.94548
FBgn0024222	IKKbeta	447.166	0.063391	0.160855	0.394089	0.693516	0.94548
FBgn0024227	aurB	22.4291	0.498928	0.455413	1.09555	0.273276	0.741173
FBgn0024230	Hs2st	618.086	0.136947	0.118022	1.16035	0.245906	0.717664
FBgn0024232	gprs	2702.47	-0.0155557	0.100749	-0.154401	0.877294	0.984165
FBgn0024234	gbb	1055.62	-0.0472753	0.0985466	-0.479726	0.631422	0.928078
FBgn0024236	foi	2480.51	-0.133754	0.0956511	-1.39835	0.162008	0.605661
FBgn0024238	Fim	3482.32	-0.0585776	0.0816474	-0.717446	0.473099	0.868855
FBgn0024244	drm	305.506	-0.0386081	0.132701	-0.290941	0.771096	0.963433
FBgn0024245	dnt	264.774	0.165785	0.161854	1.02429	0.305698	0.764414
FBgn0024248	chico	2050.95	-0.169954	0.0996038	-1.7063	0.0879531	0.46876
FBgn0024250	brk	406.077	-0.204443	0.197003	-1.03777	0.299379	0.760065
FBgn0024251	bbx	26.2408	-0.149222	0.437127	-0.341369	0.732826	0.953958
FBgn0024273	WASp	1352.74	0.0548386	0.101248	0.541629	0.588074	0.912745
FBgn0024277	trio	8525.03	-0.0308301	0.10917	-0.282405	0.777633	0.964332
FBgn0024285	Srp54	1204.27	0.16595	0.0990242	1.67586	0.0937663	0.478963
FBgn0024288	Sox100B	6.86247	1.03928	0.819068	1.26886	0.204492	0.663602
FBgn0024289	Sodh-1	3287.41	2.8707	0.715056	4.01465	5.95347e-05	0.00414866
FBgn0024291	Sirt1	2270.98	-0.231965	0.130566	-1.77662	0.0756314	0.435525
FBgn0024293	Spn43Ab	9040.92	0.0653235	0.169759	0.384803	0.700384	0.94548
FBgn0024294	Spn43Aa	7.32917	0.644419	0.91884	0.701339	0.483091	0.873764
FBgn0024314	Plap	775.013	0.10192	0.136941	0.74426	0.456719	0.861025
FBgn0024315	Picot	3122.35	0.221384	0.114538	1.93284	0.0532561	0.370258
FBgn0024319	Nach	0.752737	-3.07438	2.96674	-1.03628	0.30007	NA
FBgn0024320	Npc1a	4842.17	0.037931	0.143255	0.264779	0.79118	0.966607
FBgn0024321	NK7.1	1122.55	-0.0938823	0.102392	-0.916887	0.359202	0.802752
FBgn0024326	Mkk4	1893.24	-0.044376	0.0979874	-0.452874	0.650639	0.931395
FBgn0024329	Mekk1	1715.9	-0.0864679	0.0878281	-0.984513	0.324863	0.779857
FBgn0024330	MED6	375.393	-0.10635	0.169313	-0.628122	0.529924	0.889583
FBgn0024352	Stip1	1413.12	-0.247248	0.174164	-1.41963	0.155715	0.597572
FBgn0024360	MTPAP	256.334	0.0100268	0.144199	0.0695345	0.944564	0.994373
FBgn0024361	Tsp2A	28.3649	-0.38981	0.392144	-0.994048	0.320199	0.775377
FBgn0024362	Naa30A	1107.79	0.0686	0.120921	0.567311	0.570503	0.90838
FBgn0024364	CG11417	406.792	-0.483294	0.204617	-2.36194	0.0181796	0.213127
FBgn0024365	CG12773	1129.57	0.133757	0.110555	1.20987	0.22633	0.693004
FBgn0024366	CG11409	115.701	0.655974	0.374473	1.75173	0.0798209	0.446165
FBgn0024371	E2f2	422.701	0.0872569	0.145714	0.598823	0.549291	0.898225
FBgn0024432	Dlc90F	1168.15	-0.03167	0.139291	-0.227366	0.820139	0.972685
FBgn0024491	Bin1	341.859	-1.00204	0.277263	-3.61405	0.000301447	0.0132599
FBgn0024509	Sec13	1486.86	0.195558	0.147957	1.32172	0.186263	0.639845
FBgn0024510	dlt	217.174	-0.360457	0.191288	-1.88437	0.0595154	0.388911
FBgn0024542	Neos	201.348	0.033968	0.167179	0.203184	0.838991	0.977031
FBgn0024555	flfl	4251.16	-0.18381	0.086905	-2.11506	0.0344246	0.296374
FBgn0024556	mEFTu1	2101.48	0.148492	0.0966629	1.53618	0.124493	0.545779
FBgn0024558	Dph5	477.268	-0.17728	0.208045	-0.852126	0.394144	0.823811
FBgn0024689	fws	1067.46	0.0682354	0.118484	0.575906	0.564679	0.90503
FBgn0024698	Cpsf160	525.069	-0.138536	0.151176	-0.916394	0.35946	0.802752
FBgn0024728	Slip1	3257.02	-0.0403529	0.105282	-0.383285	0.701508	0.94548
FBgn0024732	Drep1	846.215	-0.173699	0.121798	-1.42613	0.153832	0.594705
FBgn0024733	RpL10	38296.7	-0.341413	0.144481	-2.36303	0.0181261	0.212738
FBgn0024734	PRL-1	328.277	-0.0623768	0.25999	-0.23992	0.810392	0.97055
FBgn0024740	Lip2	57.7511	1.77181	0.643632	2.75283	0.00590832	0.111175
FBgn0024754	Flo1	1919.02	0.00383224	0.0863226	0.0443944	0.96459	0.996091
FBgn0024804	Dbp80	2137.88	-0.0203536	0.0985166	-0.206601	0.836322	0.976604
FBgn0024806	DIP2	3689.16	-0.11023	0.110392	-0.998535	0.31802	0.775048
FBgn0024807	DIP1	37445.1	-0.161485	0.10941	-1.47597	0.139953	0.57482
FBgn0024811	Crk	1725.39	-0.0985846	0.142017	-0.694177	0.487571	0.874918
FBgn0024814	Clc	2926.76	0.117805	0.108424	1.08653	0.277246	0.744574
FBgn0024833	AP-1mu	1538.55	-0.0445918	0.0906307	-0.492016	0.622708	0.923782
FBgn0024836	stan	1837.66	-0.149057	0.133419	-1.11721	0.263905	0.732768
FBgn0024841	Pcd	925.001	0.324346	0.109941	2.95018	0.00317589	0.0737214
FBgn0024846	p38b	783.95	0.0149884	0.142552	0.105143	0.916262	0.990878
FBgn0024887	kin17	362.554	0.0499313	0.132003	0.37826	0.705237	0.9455
FBgn0024889	Kap-alpha1	2240.18	-0.180427	0.124983	-1.44361	0.148849	0.587778
FBgn0024897	b6	105.486	0.835999	0.262724	3.18204	0.00146241	0.0426461
FBgn0024909	Taf7	190.405	-0.138399	0.193085	-0.71678	0.47351	0.868855
FBgn0024912	agt	171.019	-0.203109	0.186298	-1.09024	0.275609	0.742498
FBgn0024913	Actbeta	1831.65	-0.202175	0.0985476	-2.05154	0.0402142	0.323016
FBgn0024920	Ts	22.0657	3.0704	0.627672	4.89172	9.99592e-07	0.000160996
FBgn0024921	Tnpo	2694.54	-0.120479	0.096341	-1.25054	0.211101	0.674814
FBgn0024941	RSG7	2072.61	-0.0717725	0.103945	-0.690486	0.489889	0.876392
FBgn0024943	PIP82	9901.23	-0.0621908	0.0856959	-0.725715	0.468014	0.867221
FBgn0024944	Oamb	1463.24	0.0466688	0.143741	0.324672	0.745429	0.957996
FBgn0024945	NitFhit	827.516	-0.022032	0.115346	-0.191008	0.848519	0.978752
FBgn0024947	NTPase	2883.45	-0.077096	0.0875441	-0.880653	0.378506	0.811384
FBgn0024956	Mat1	338.526	-0.215299	0.163551	-1.3164	0.18804	0.641807
FBgn0024957	Irp-1B	5462.69	0.235561	0.205797	1.14463	0.252363	0.724428
FBgn0024958	Irp-1A	1428.74	0.0455	0.0956647	0.475619	0.634346	0.92928
FBgn0024963	GluClalpha	8859.25	-0.0884782	0.123626	-0.715695	0.47418	0.869494
FBgn0024973	CG2701	913.646	0.0373028	0.140162	0.26614	0.790132	0.966279
FBgn0024975	CG2712	124.927	-0.00332728	0.236138	-0.0140904	0.988758	0.998774
FBgn0024980	Syx4	916.151	-0.109107	0.111467	-0.97883	0.327664	0.781393
FBgn0024983	CG4293	442.495	0.130462	0.17129	0.761645	0.446272	0.857307
FBgn0024985	Rilpl	4129.86	-0.0693611	0.0884872	-0.783855	0.433125	0.84607
FBgn0024986	CG3719	1002.14	0.0913113	0.161156	0.566601	0.570985	0.908419
FBgn0024987	ssx	3606.88	0.0215975	0.102992	0.209701	0.833901	0.976327
FBgn0024989	CG3777	173.088	1.89855	0.827197	2.29516	0.0217241	0.231598
FBgn0024991	CG2694	157.7	0.130222	0.221529	0.587834	0.556644	0.901031
FBgn0024992	Spg7	949.253	-0.0078383	0.117672	-0.0666112	0.946891	0.99463
FBgn0024993	CG2662	91.9128	0.154844	0.22044	0.70243	0.482411	0.873369
FBgn0024994	Ugalt	360.808	0.0712259	0.161694	0.440499	0.659576	0.934669
FBgn0024995	CG2680	368.314	0.021547	0.157263	0.137013	0.891021	0.988009
FBgn0024996	eIF2Bbeta	872.2	0.0685499	0.138334	0.49554	0.620219	0.923127
FBgn0024997	CG2681	692.64	0.130065	0.158558	0.820298	0.412046	0.835829
FBgn0024998	CG2685	383.211	-0.0327364	0.132125	-0.247768	0.804314	0.970132
FBgn0025109	Bem46	283.971	0.174078	0.170315	1.0221	0.306735	0.765851
FBgn0025111	Ant2	125.602	-0.38889	0.247966	-1.56832	0.116807	0.530057
FBgn0025185	az2	217.017	0.156614	0.165427	0.946729	0.343777	0.791075
FBgn0025186	ari-2	1207.42	-0.1297	0.105229	-1.23255	0.217743	0.682494
FBgn0025334	PHDP	23.2783	0.174795	0.461653	0.378628	0.704964	0.9455
FBgn0025335	Cpes	756.512	0.154204	0.11608	1.32843	0.184038	0.636915
FBgn0025336	CG4882	640.36	0.0398418	0.13942	0.285769	0.775055	0.964332
FBgn0025352	Thiolase	6201.89	0.0798685	0.129723	0.615686	0.538102	0.894749
FBgn0025360	Optix	740.893	0.0832924	0.112607	0.739675	0.459497	0.862583
FBgn0025366	Ip259	4634.23	-0.0089835	0.102875	-0.0873246	0.930413	0.993472
FBgn0025373	Fpps	465.661	0.188931	0.166774	1.13286	0.257274	0.728035
FBgn0025378	CG3795	1.19652	-2.53126	2.02133	-1.25228	0.210469	NA
FBgn0025381	rush	1896.42	0.0515112	0.0869407	0.592487	0.553524	0.900387
FBgn0025382	Rab27	348.524	0.0480989	0.198877	0.241852	0.808895	0.97055
FBgn0025383	CG14780	2.95388	-0.31625	1.11612	-0.283347	0.776911	NA
FBgn0025387	CG12184	41.6041	0.149985	0.328219	0.456966	0.647695	0.931395
FBgn0025388	CG12179	194.902	0.0253381	0.169875	0.149158	0.881429	0.984862
FBgn0025390	Mur2B	2448.61	0.0300525	0.237678	0.126442	0.899382	0.988009
FBgn0025391	Scgdelta	666.137	0.0854865	0.181689	0.47051	0.637991	0.92928
FBgn0025394	inc	1714.49	0.0202567	0.107441	0.188539	0.850454	0.979103
FBgn0025454	Cyp6g1	5196.31	1.01751	0.280537	3.62703	0.000286703	0.012882
[truncated: 12,060 more rows]

## Sheet: glia KD
RNAseq data for PIG-A neuron-specific KD
FBgn	flybase symbol	baseMean	log2FoldChange	lfcSE	stat	pvalue	padj
FBgn0000003	7SLRNA:CR32864	286.243	-0.253397	0.191086	-1.32609	0.184811	0.498711
FBgn0000008	a	1007.66	-0.117054	0.126287	-0.926888	0.353985	0.670507
FBgn0000014	abd-A	0.330838	0.212048	4.07815	0.0519962	0.958532	NA
FBgn0000015	Abd-B	1.79802	3.31814	1.8776	1.76722	0.0771907	NA
FBgn0000017	Abl	4410.35	-0.0288906	0.143094	-0.201899	0.839995	0.948717
FBgn0000018	abo	297.93	0.129238	0.203134	0.63622	0.524633	0.795631
FBgn0000024	Ace	6219.23	0.241789	0.161234	1.49962	0.133714	0.421506
FBgn0000028	acj6	431.385	-0.285392	0.17983	-1.58701	0.112511	0.382995
FBgn0000032	Acph-1	520.161	-0.0424913	0.155546	-0.273174	0.784719	0.927561
FBgn0000036	nAChRalpha1	1246.77	-0.155891	0.220507	-0.706964	0.479589	0.765756
FBgn0000037	mAChR-A	2296.3	-0.11767	0.137875	-0.853457	0.393406	0.700383
FBgn0000038	nAChRbeta1	9245.06	-0.182175	0.159758	-1.14032	0.254152	0.578875
FBgn0000039	nAChRalpha2	1079.98	-0.346526	0.131976	-2.62567	0.0086479	0.0743193
FBgn0000042	Act5C	21694.3	-0.218013	0.0987953	-2.20671	0.0273342	0.163898
FBgn0000043	Act42A	1200.61	-1.09522	0.21179	-5.17126	2.32516e-07	1.69578e-05
FBgn0000044	Act57B	29484	-1.58531	0.755705	-2.09779	0.0359236	0.196098
FBgn0000045	Act79B	866.011	-0.601298	0.663432	-0.906344	0.364754	0.678911
FBgn0000046	Act87E	2724.27	-1.36135	0.361379	-3.76709	0.000165162	0.00402268
FBgn0000047	Act88F	125.676	-1.36052	0.432435	-3.14618	0.00165419	0.0235206
FBgn0000052	Pfas	3642.6	0.555188	0.266586	2.08258	0.0372896	0.2013
FBgn0000053	Gart	4284.43	0.409925	0.25465	1.60975	0.107451	0.37524
FBgn0000055	Adh	62.136	0.549747	0.322812	1.70299	0.088569	0.336159
FBgn0000057	adp	1035.48	-0.102156	0.130598	-0.782219	0.434086	0.731287
FBgn0000061	al	15.9327	-0.691641	0.528994	-1.30746	0.191055	0.506379
FBgn0000063	Mps1	61.8965	-0.266262	0.317164	-0.839509	0.401184	0.706918
FBgn0000064	Ald1	40488.6	-0.293781	0.200608	-1.46445	0.14307	0.436744
FBgn0000071	Ama	11.6055	-1.271	0.838026	-1.51666	0.129351	0.413716
FBgn0000075	amd	238.417	-0.0776092	0.328436	-0.236299	0.813201	0.940083
FBgn0000077	amx	348.006	-0.128199	0.181384	-0.706783	0.479701	0.765756
FBgn0000078	Amy-d	625.665	-0.625231	0.297921	-2.09865	0.0358479	0.195989
FBgn0000079	Amy-p	444.447	-0.477167	0.299213	-1.59474	0.11077	0.380779
FBgn0000083	AnxB9	7067.66	-0.082017	0.137679	-0.59571	0.551369	0.810381
FBgn0000084	AnxB10	4536.37	-0.121337	0.112656	-1.07706	0.281453	0.607926
FBgn0000092	CG2650	48.5162	-0.316509	0.488596	-0.647792	0.517119	0.790199
FBgn0000097	aop	1584.12	-0.0173016	0.132302	-0.130774	0.895954	0.966545
FBgn0000100	RpLP0	34227.6	0.333176	0.212879	1.5651	0.11756	0.392759
FBgn0000108	Appl	20237.2	-0.0193822	0.180039	-0.107656	0.914269	0.974245
FBgn0000109	Aprt	268.034	0.238201	0.214432	1.11085	0.266635	0.592437
FBgn0000114	bru1	1845.7	-0.0473845	0.118746	-0.399041	0.689863	0.88377
FBgn0000115	Arl1	622.201	0.0810047	0.139401	0.58109	0.56118	0.81459
FBgn0000116	Argk	41593.5	-0.720779	0.294176	-2.45016	0.0142793	0.105724
FBgn0000117	arm	10282.7	-0.14557	0.096918	-1.50199	0.1331	0.420067
FBgn0000119	arr	1424.84	0.101836	0.15528	0.655822	0.511939	0.787351
FBgn0000120	Arr1	191004	-0.132296	0.153875	-0.859762	0.38992	0.697533
FBgn0000121	Arr2	251028	-0.172132	0.15296	-1.12534	0.260444	0.584758
FBgn0000139	ash2	1049.69	-0.110476	0.204593	-0.539979	0.589212	0.830193
FBgn0000140	asp	7.90009	-1.14286	0.819047	-1.39535	0.162909	0.467617
FBgn0000146	aub	23.6197	0.0726613	0.431983	0.168204	0.866423	0.955764
FBgn0000147	aurA	36.0246	0.484924	0.411302	1.179	0.238399	0.562056
FBgn0000150	awd	10397.9	0.358384	0.155781	2.30056	0.0214165	0.13924
FBgn0000152	Axs	222.318	-0.791283	0.315289	-2.5097	0.0120833	0.0938054
FBgn0000153	b	2764.15	1.5995	0.271118	5.89965	3.64277e-09	4.29195e-07
FBgn0000157	Dll	548.137	-0.0810491	0.148775	-0.544777	0.585907	0.82842
FBgn0000158	bam	0.842208	2.10591	2.25549	0.933682	0.350468	NA
FBgn0000163	baz	2286.49	0.0440495	0.149905	0.29385	0.768873	0.920603
FBgn0000166	bcd	15.1182	0.137905	0.529751	0.260321	0.794616	0.93278
FBgn0000173	ben	3894.11	-0.271616	0.104383	-2.6021	0.00926543	0.0778485
FBgn0000179	bi	768.184	0.278402	0.119969	2.32061	0.0203078	0.134811
FBgn0000180	bib	212.249	-0.269064	0.185359	-1.45158	0.146618	0.442159
FBgn0000181	bic	12098.4	0.147992	0.149562	0.989501	0.322418	0.646042
FBgn0000183	BicD	2477.48	-0.0950394	0.117577	-0.808318	0.418908	0.722392
FBgn0000206	boss	5148.4	-0.803727	0.255621	-3.14421	0.00166535	0.0235543
FBgn0000212	brm	2781.96	-0.0360796	0.112244	-0.321438	0.747879	0.911433
FBgn0000221	brn	109.8	-0.203502	0.226383	-0.898931	0.368689	0.683292
FBgn0000228	Bsg25D	1785.86	-0.0626625	0.114932	-0.545216	0.585605	0.82842
FBgn0000229	bsk	2810.35	-0.216035	0.150572	-1.43476	0.151356	0.448639
FBgn0000233	btd	22.7178	0.0229733	0.54737	0.0419704	0.966522	0.98968
FBgn0000239	bur	3048.88	0.326847	0.151443	2.15822	0.0309106	0.17769
FBgn0000241	bw	627.279	0.135137	0.237819	0.568234	0.569876	0.81894
FBgn0000244	by	3803.67	0.0100371	0.104228	0.0962995	0.923283	0.977974
FBgn0000246	c(3)G	153.895	0.140701	0.211671	0.664715	0.506233	0.783398
FBgn0000247	ca	2865.15	0.210142	0.138132	1.52132	0.12818	0.41132
FBgn0000250	cact	4209.52	-0.200516	0.15848	-1.26525	0.205783	0.527547
FBgn0000251	cad	1.02563	0.269279	2.13693	0.126012	0.899722	NA
FBgn0000253	Cam	55098.9	-0.334971	0.165057	-2.02943	0.0424142	0.216159
FBgn0000256	capu	2999.48	-0.183493	0.132124	-1.38879	0.164898	0.470177
FBgn0000257	car	701.598	0.133438	0.136821	0.975271	0.329426	0.651859
FBgn0000259	CkIIbeta	3031.61	0.0108999	0.126686	0.086039	0.931435	0.980454
FBgn0000261	Cat	13302.8	-0.303596	0.133774	-2.26946	0.0232401	0.146405
FBgn0000273	Pka-C1	8330.43	-0.115833	0.144783	-0.800042	0.423687	0.724869
FBgn0000274	Pka-C2	1.08128	1.09366	2.40461	0.454817	0.649241	NA
FBgn0000276	CecA1	390.011	4.60608	2.27937	2.02077	0.043304	0.218992
FBgn0000277	CecA2	504.234	3.44566	2.52325	1.36556	0.172076	0.481552
FBgn0000278	CecB	35.0779	1.94632	1.83318	1.06172	0.288364	0.614501
FBgn0000279	CecC	227.257	1.14341	1.87372	0.610231	0.541709	0.805724
FBgn0000280	Cec-Psi1	0.779171	3.174	3.05718	1.03821	0.299172	NA
FBgn0000281	Cec2	1.71599	0.107728	2.23508	0.0481989	0.961558	NA
FBgn0000283	Cp190	2753.93	-0.026771	0.149744	-0.178778	0.858112	0.953646
FBgn0000286	Cf2	2370.28	-0.0299358	0.103894	-0.288137	0.773242	0.922846
FBgn0000287	salr	703.975	-0.241082	0.153643	-1.5691	0.116624	0.391113
FBgn0000289	cg	4707.67	0.053311	0.108218	0.492625	0.622278	0.853453
FBgn0000299	Col4a1	12710.8	-0.851691	0.277798	-3.06587	0.0021704	0.0283077
FBgn0000303	ChAT	2424.15	-0.289376	0.172394	-1.67857	0.0932363	0.347561
FBgn0000307	chif	2335.15	-0.153643	0.130251	-1.17959	0.238164	0.562056
FBgn0000308	chic	6491.68	-0.243141	0.121309	-2.00431	0.0450374	0.224295
FBgn0000316	cin	1166.59	0.335158	0.123347	2.71719	0.00658381	0.061325
FBgn0000317	ck	1857.91	0.187717	0.122276	1.53519	0.124736	0.406349
FBgn0000318	cl	1361.2	-0.227774	0.110502	-2.06127	0.0392777	0.207334
FBgn0000319	Chc	13889.1	0.129208	0.113116	1.14226	0.253347	0.578198
FBgn0000320	eya	1233.71	-0.00540994	0.126887	-0.0426358	0.965992	0.98968
FBgn0000326	clt	728.325	0.0234	0.163873	0.142793	0.886454	0.962202
FBgn0000330	cm	813.586	0.119711	0.11948	1.00194	0.316373	0.640999
FBgn0000337	cn	1.44981	1.75028	1.78292	0.981693	0.326251	NA
FBgn0000339	cni	788.236	0.176542	0.160095	1.10273	0.270143	0.595558
FBgn0000346	comt	8490.05	-0.114003	0.141348	-0.80654	0.419932	0.722778
FBgn0000351	cort	21.6445	0.0816682	0.448043	0.182278	0.855365	0.952666
FBgn0000352	cos	1010.59	-0.178218	0.134995	-1.32018	0.186774	0.502107
FBgn0000355	Cp15	2.25622	-4.52464	2.27414	-1.9896	0.0466349	NA
FBgn0000356	Cp16	0.450977	0.991582	3.69195	0.268579	0.788254	NA
FBgn0000357	Cp18	22.7223	-0.0493613	0.615586	-0.0801859	0.936089	0.9818
FBgn0000358	Cp19	1.18201	1.54167	1.85224	0.83233	0.405223	NA
FBgn0000359	Cp36	1.59631	-2.90645	2.29713	-1.26525	0.205781	NA
FBgn0000360	Cp38	1.3929	-2.69291	2.26978	-1.18642	0.235457	NA
FBgn0000370	crc	6557.62	0.238915	0.170507	1.40121	0.161152	0.46476
FBgn0000376	crm	735.98	-0.0709042	0.169707	-0.417803	0.676091	0.879017
FBgn0000377	crn	900.776	0.00548356	0.201205	0.0272536	0.978257	0.992077
FBgn0000382	csw	9501.63	-0.0578151	0.123547	-0.467961	0.639813	0.863039
FBgn0000384	cta	747.77	0.491028	0.165992	2.95814	0.00309498	0.0367049
FBgn0000394	cv	919.907	-0.347452	0.124185	-2.79785	0.00514436	0.051535
FBgn0000395	cv-2	729.607	0.165867	0.126618	1.30998	0.190201	0.505491
FBgn0000404	CycA	60.4204	0.399452	0.294425	1.35672	0.174871	0.485478
FBgn0000405	CycB	23.1892	0.177523	0.464767	0.381961	0.702491	0.889141
FBgn0000406	Cyt-b5-r	23698.6	0.83994	0.248927	3.37424	0.000740185	0.0131166
FBgn0000411	D	384.765	-0.331619	0.18701	-1.77327	0.0761842	0.306251
FBgn0000412	D1	2357.98	-0.0961943	0.138701	-0.693536	0.487973	0.7698
FBgn0000414	Dab	6920.29	0.0267904	0.145925	0.183591	0.854335	0.952545
FBgn0000416	Sap-r	38373.8	-0.0616776	0.135966	-0.453625	0.650099	0.868658
FBgn0000422	Ddc	4746.98	-0.140212	0.136338	-1.02842	0.303752	0.629619
FBgn0000426	SmF	106.099	0.380305	0.260649	1.45907	0.144546	0.439999
FBgn0000427	43800	47.4938	-4.277	1.76503	-2.42319	0.0153849	0.111155
FBgn0000439	Dfd	1041.67	-0.421559	0.114661	-3.67657	0.000236388	0.00529085
FBgn0000442	Pkg21D	11.9577	-0.897818	0.66015	-1.36002	0.173823	0.484167
FBgn0000447	Dhod	828.173	0.194654	0.180029	1.08123	0.279594	0.606786
FBgn0000448	Hr3	307.549	-0.0106844	0.181259	-0.0589456	0.952995	0.986013
FBgn0000449	dib	0.602526	2.80333	3.9863	0.703243	0.481905	NA
FBgn0000451	ect	100.727	-1.1206	0.536041	-2.09051	0.0365724	0.198127
FBgn0000454	Dip-B	2727.48	-0.204924	0.154865	-1.32324	0.185754	0.500581
FBgn0000455	Dip-C	1085.66	-0.0528698	0.129922	-0.406936	0.684055	0.881049
FBgn0000459	disco	1254.96	0.0169358	0.199311	0.0849715	0.932284	0.980769
FBgn0000463	Dl	262.33	-0.477649	0.31373	-1.52248	0.127888	0.41069
FBgn0000464	Lar	324.513	0.234627	0.19629	1.19531	0.231966	0.555134
FBgn0000473	Cyp6a2	617.895	-0.298955	0.141606	-2.11117	0.0347574	0.192278
FBgn0000477	DNaseII	3423.27	0.782752	0.215274	3.63607	0.000276829	0.00609422
FBgn0000479	dnc	5505.04	-0.240149	0.148637	-1.61567	0.106165	0.372201
FBgn0000482	dor	680.857	-0.0299173	0.129688	-0.230686	0.817558	0.941209
FBgn0000489	Pka-C3	2198.17	-0.111099	0.104395	-1.06422	0.28723	0.613058
FBgn0000490	dpp	767.124	-0.498825	0.150276	-3.3194	0.000902095	0.0150176
FBgn0000492	Dr	291.996	0.672267	0.171061	3.92999	8.49491e-05	0.00229405
FBgn0000499	dsh	974.306	-0.157757	0.13185	-1.19648	0.231508	0.554512
FBgn0000500	Dsk	1301.39	0.332659	0.153884	2.16175	0.0306378	0.176987
FBgn0000504	dsx	1022.02	0.645085	0.187406	3.44217	0.000577069	0.0107783
FBgn0000520	dwg	411.639	-0.0211029	0.177947	-0.118591	0.905599	0.970822
FBgn0000524	dx	402.589	0.301723	0.145113	2.07923	0.0375963	0.202141
FBgn0000527	e	3795.51	1.60451	0.330576	4.85369	1.21188e-06	6.87605e-05
FBgn0000529	bsh	203.589	0.332669	0.224832	1.47964	0.13897	0.430234
FBgn0000533	ea	732.802	-0.190777	0.137921	-1.38323	0.166594	0.473437
FBgn0000535	eag	2537.92	-0.16638	0.208542	-0.797824	0.424973	0.725485
FBgn0000536	eas	6308.71	0.493077	0.154589	3.18961	0.00142466	0.0211548
FBgn0000541	E(bx)	5162.07	0.129118	0.162567	0.794244	0.427053	0.726621
FBgn0000542	ec	294.503	-0.484514	0.358516	-1.35144	0.176553	0.487896
FBgn0000543	ecd	836.801	-0.170532	0.147955	-1.15259	0.249078	0.573459
FBgn0000546	EcR	1655.46	0.0321658	0.129215	0.248933	0.803413	0.936544
FBgn0000547	ed	2847.22	-0.240298	0.160846	-1.49396	0.135186	0.423338
FBgn0000551	Edg78E	22.7356	-0.598205	0.440543	-1.35788	0.174502	0.484923
FBgn0000552	Edg84A	1.93172	0.838906	1.76258	0.475954	0.634107	NA
FBgn0000557	eEF1alpha2	16890	-0.505517	0.151371	-3.33959	0.000839034	0.0143433
FBgn0000559	eEF2	127857	0.216788	0.204978	1.05762	0.290231	0.616396
FBgn0000560	eg	15.1801	-1.09587	0.54757	-2.00133	0.0453567	0.22502
FBgn0000562	egl	2602.02	-0.147642	0.1168	-1.26406	0.206209	0.52774
FBgn0000564	Eh	601.516	0.156603	0.182609	0.857584	0.391122	0.698056
FBgn0000565	Eip71CD	1376.95	-0.537172	0.137457	-3.90793	9.30908e-05	0.00248265
FBgn0000566	Eip55E	1496.4	0.351238	0.201195	1.74576	0.080852	0.318682
FBgn0000567	Eip74EF	1220.6	0.0146952	0.145504	0.100995	0.919554	0.976322
FBgn0000568	Eip75B	4945.96	0.168503	0.154198	1.09277	0.274493	0.600899
FBgn0000575	emc	3697.12	0.183844	0.140774	1.30595	0.191568	0.506987
FBgn0000576	ems	101.327	-0.199509	0.271218	-0.735605	0.461971	0.752818
FBgn0000577	en	84.0181	-0.239402	0.244404	-0.979533	0.327317	0.649945
FBgn0000578	ena	1456.96	-0.230525	0.154201	-1.49496	0.134924	0.423083
FBgn0000579	Eno	35891.7	-0.0936876	0.191414	-0.489449	0.624524	0.85533
FBgn0000581	E(Pc)	3531.23	0.165662	0.167674	0.987999	0.323153	0.646518
FBgn0000588	esc	294.853	-0.665919	0.232916	-2.85906	0.00424901	0.0451921
FBgn0000592	Est-6	6814.38	0.535256	0.315758	1.69515	0.0900472	0.339598
FBgn0000606	eve	0.663592	-1.4128	3.28823	-0.429653	0.667448	NA
FBgn0000611	exd	3133.32	-0.11672	0.104502	-1.11692	0.26403	0.590355
FBgn0000615	exu	115.057	1.37077	0.309932	4.42282	9.7421e-06	0.000388272
FBgn0000617	e(y)1	232.557	-0.0375579	0.213129	-0.176221	0.86012	0.954102
FBgn0000618	e(y)2	142.237	-0.0018422	0.195208	-0.00943711	0.99247	0.997371
FBgn0000625	eyg	151.389	-0.102806	0.249907	-0.411376	0.680796	0.879714
FBgn0000629	E(z)	829.705	-0.0321434	0.150286	-0.213882	0.830639	0.946248
FBgn0000633	CG17716	1473.94	-0.133266	0.142513	-0.935113	0.34973	0.668114
FBgn0000635	Fas2	3554.11	0.185294	0.13973	1.32608	0.184813	0.498711
FBgn0000636	Fas3	1974.31	-0.272589	0.108189	-2.51956	0.0117502	0.0928328
FBgn0000639	Fbp1	8.27692	-1.81337	1.01124	-1.79322	0.0729372	0.29823
FBgn0000640	Fbp2	5.66471	-1.35179	1.12445	-1.20218	0.229292	0.55291
FBgn0000644	Fcp3C	20.0051	0.802169	0.495153	1.62004	0.105223	0.370581
FBgn0000658	fj	150.58	-1.13495	0.495927	-2.28854	0.022106	0.141492
FBgn0000659	fkh	461.586	-0.235538	0.195021	-1.20776	0.22714	0.550943
FBgn0000662	fl(2)d	2405.64	-0.0201498	0.121223	-0.166221	0.867983	0.956395
FBgn0000667	Actn	6194.16	-1.14277	0.699761	-1.63308	0.102452	0.365175
FBgn0000709	fliI	1244.88	0.00867177	0.129872	0.0667715	0.946764	0.984372
FBgn0000711	flw	4152.98	-0.170929	0.127175	-1.34404	0.178934	0.491508
FBgn0000715	FMRFa	270.421	0.533944	0.207908	2.56817	0.0102237	0.0839911
FBgn0000719	fog	1642.5	0.195103	0.123919	1.57443	0.115388	0.389875
FBgn0000721	for	7554.71	0.342183	0.128545	2.66198	0.00776829	0.0690318
FBgn0000723	FER	2809.22	-0.346714	0.126925	-2.73164	0.00630196	0.0596322
FBgn0000808	gd	1.70233	2.02413	1.96044	1.03248	0.301845	NA
FBgn0000810	fs(1)K10	754.031	-0.0335314	0.130165	-0.257607	0.79671	0.933489
FBgn0000826	png	3.32954	-0.449475	1.14001	-0.394274	0.693379	NA
FBgn0000927	fs(1)Ya	0.88373	0.624303	3.06213	0.203879	0.838448	NA
FBgn0000928	fs(1)Yb	5.15829	0.668979	1.23743	0.540618	0.588771	NA
FBgn0000964	tj	515.434	0.526603	0.231926	2.27056	0.0231733	0.146228
FBgn0000996	dup	157.436	0.052525	0.220543	0.238163	0.811755	0.939728
FBgn0001075	ft	204.684	-0.581686	0.492341	-1.18147	0.237416	0.561827
FBgn0001077	ftz	3.4811	0.53043	1.28551	0.412621	0.679884	NA
FBgn0001078	ftz-f1	1668.65	-0.13307	0.152337	-0.873529	0.382375	0.691905
FBgn0001079	fu	435.369	0.347116	0.148464	2.33806	0.0193842	0.130457
FBgn0001083	fw	563.049	-0.77192	0.338358	-2.28137	0.0225265	0.143498
FBgn0001084	fy	108.478	0.167817	0.244202	0.687205	0.491954	0.773246
FBgn0001085	fz	315.71	-0.360094	0.182509	-1.97302	0.048493	0.233975
FBgn0001086	fzy	5.48447	0.285499	1.06977	0.266878	0.789563	0.930312
FBgn0001087	g	3244.91	-0.00103743	0.123298	-0.00841402	0.993287	0.997632
FBgn0001089	Gal	105.361	-0.00963724	0.252959	-0.0380981	0.969609	0.990235
FBgn0001090	bnb	29365.7	0.924214	0.171523	5.38828	7.11357e-08	6.20037e-06
FBgn0001091	Gapdh1	21313	-0.760519	0.335112	-2.26945	0.023241	0.146405
FBgn0001092	Gapdh2	23119.2	-0.124058	0.221693	-0.559592	0.575758	0.822149
FBgn0001098	Gdh	10269.1	-0.944395	0.305636	-3.08993	0.00200201	0.0267285
FBgn0001099	gdl	4.97311	0.447436	1.08348	0.412964	0.679633	NA
FBgn0001104	Galphai	1370.57	0.208999	0.137052	1.52496	0.127269	0.410327
FBgn0001105	Gbeta13F	6503.69	-0.00405425	0.0953312	-0.0425281	0.966078	0.98968
FBgn0001108	DCTN1-p150	2323.2	-0.050436	0.106768	-0.472389	0.636649	0.862458
FBgn0001112	Gld	887.22	-0.144424	0.152024	-0.950009	0.342108	0.660219
FBgn0001114	Glt	25176.2	0.1634	0.200685	0.814209	0.415525	0.720266
FBgn0001120	gnu	2.31094	-2.49036	1.5517	-1.60492	0.108512	NA
FBgn0001122	Galphao	6556.55	-0.0351891	0.158794	-0.221602	0.824624	0.943924
FBgn0001123	Galphas	2446.61	0.0127884	0.100955	0.126674	0.899198	0.967999
FBgn0001124	Got1	8902.57	0.16138	0.147519	1.09396	0.273974	0.60046
FBgn0001125	Got2	7720.71	0.234439	0.236176	0.992649	0.320881	0.645357
FBgn0001128	Gpdh1	30555.4	0.19661	0.295005	0.666462	0.505116	0.782973
FBgn0001133	grau	646.666	-0.0397452	0.173667	-0.228859	0.818979	0.941736
FBgn0001134	Grd	326.039	0.792931	0.163536	4.84867	1.24295e-06	6.94445e-05
FBgn0001137	grk	420.725	-0.281191	0.145408	-1.93381	0.0531364	0.246506
FBgn0001138	grn	178.77	0.293664	0.181593	1.61716	0.105845	0.371998
FBgn0001139	gro	2776.56	0.0751877	0.1066	0.705327	0.480607	0.766184
FBgn0001142	Gs1	8546.6	-0.213571	0.162492	-1.31435	0.188728	0.504702
FBgn0001145	Gs2	35412.2	0.219317	0.148069	1.48118	0.138559	0.429456
FBgn0001147	gsb-n	8.23461	-0.520145	0.860114	-0.60474	0.545352	0.807001
FBgn0001148	gsb	1.21409	-1.39385	1.99116	-0.700019	0.483915	NA
FBgn0001149	GstD1	8850.27	-0.261305	0.132123	-1.97774	0.0479575	0.232817
FBgn0001150	gt	384.359	-0.0661163	0.19811	-0.333736	0.738579	0.908271
FBgn0001168	h	1234.62	0.322423	0.239395	1.34683	0.178036	0.490045
FBgn0001169	H	673.634	0.129485	0.153772	0.842058	0.399755	0.70595
FBgn0001170	H2.0	25.444	-0.0665684	0.420666	-0.158245	0.874264	0.958322
FBgn0001174	halo	1.6104	-1.08279	1.60933	-0.672819	0.501062	NA
FBgn0001179	hay	445.712	-0.0758466	0.130605	-0.580731	0.561422	0.81459
FBgn0001180	hb	143.156	-0.481881	0.264711	-1.82041	0.068697	0.286311
FBgn0001185	her	654.592	-0.0992971	0.124038	-0.800536	0.4234	0.724662
FBgn0001186	Hex-A	8695.08	-0.43256	0.134955	-3.20521	0.00134962	0.020408
FBgn0001187	Hex-C	3452.23	0.351468	0.220397	1.59471	0.110778	0.380779
FBgn0001189	hfw	1318.06	0.0814809	0.153451	0.530988	0.595427	0.834018
FBgn0001197	His2Av	1303.81	0.184995	0.123631	1.49635	0.134562	0.422535
FBgn0001202	hook	2612.87	-0.024674	0.115014	-0.214531	0.830133	0.946248
FBgn0001206	Hmr	287.864	0.227236	0.193181	1.17628	0.239481	0.563167
FBgn0001208	Hn	19922	-0.00916873	0.257568	-0.0355973	0.971603	0.99032
FBgn0001215	Hrb98DE	7178.89	-0.0555857	0.12199	-0.45566	0.648635	0.868275
FBgn0001216	Hsc70-1	563.927	-0.159087	0.291311	-0.546108	0.584992	0.827947
FBgn0001217	Hsc70-2	3.00255	0.915745	1.27019	0.72095	0.47094	NA
FBgn0001218	Hsc70-3	14545.9	0.744864	0.156158	4.76993	1.84289e-06	9.49526e-05
FBgn0001220	Hsc70-5	7588.05	0.316824	0.111637	2.83798	0.00453994	0.047413
FBgn0001222	Hsf	1734.9	-0.0101291	0.12492	-0.0810841	0.935375	0.9818
FBgn0001224	Hsp23	306.77	-0.991409	0.197051	-5.03122	4.87356e-07	3.0735e-05
FBgn0001225	Hsp26	287.604	-0.442608	0.174459	-2.53704	0.0111794	0.0893822
FBgn0001226	Hsp27	83.129	-0.249594	0.250357	-0.996953	0.318787	0.643299
FBgn0001227	Hsp67Ba	14.9896	0.395228	0.604812	0.653472	0.513452	0.787965
FBgn0001228	CG4456	0.325805	1.94943	4.04931	0.481423	0.630216	NA
FBgn0001229	Hsp67Bc	183.931	-0.820534	0.34277	-2.39383	0.0166735	0.117141
FBgn0001230	Hsp68	496.058	-0.976133	0.204348	-4.77681	1.78098e-06	9.3141e-05
FBgn0001233	Hsp83	38492.3	-0.534794	0.330951	-1.61593	0.10611	0.37213
FBgn0001234	lncRNA:Hsromega	4171.48	-0.166757	0.165859	-1.00541	0.314699	0.639236
FBgn0001235	hth	4619.75	0.0941876	0.0981809	0.959327	0.337394	0.657075
FBgn0001247	Ide	2956.69	0.0448578	0.117253	0.382573	0.702037	0.888964
FBgn0001248	Idh	11489.2	0.224787	0.11238	2.00024	0.0454742	0.225395
FBgn0001250	if	3716.42	-0.151805	0.197156	-0.769971	0.441317	0.737891
FBgn0001253	ImpE1	330.912	-0.220536	0.178351	-1.23653	0.216261	0.538892
FBgn0001254	ImpE2	1.06839	0.171078	2.46215	0.069483	0.944605	NA
FBgn0001255	ImpE3	23.2536	-0.0911954	0.461122	-0.197769	0.843226	0.949769
FBgn0001256	ImpL1	9.45964	-1.35689	0.677034	-2.00417	0.0450523	0.224295
FBgn0001257	ImpL2	2038.33	1.61357	0.13475	11.9746	4.82834e-33	5.17646e-29
FBgn0001258	Ldh	413.95	0.739159	0.177796	4.15735	3.21966e-05	0.0010397
FBgn0001259	in	158.942	-1.00175	0.223331	-4.48549	7.27469e-06	0.000302294
FBgn0001263	inaD	12514.8	-0.899266	0.146144	-6.15327	7.58993e-10	1.16245e-07
FBgn0001269	inv	114.503	-0.136345	0.288764	-0.472167	0.636808	0.862458
FBgn0001276	ix	237.737	-0.326481	0.178954	-1.82439	0.0680936	0.285389
FBgn0001280	janA	393.724	-0.148997	0.204707	-0.727852	0.466704	0.756939
FBgn0001285	Jon44E	10.5467	-0.222293	0.689948	-0.322188	0.74731	0.911275
FBgn0001291	Jra	1199.43	-0.193806	0.137916	-1.40524	0.15995	0.463081
FBgn0001296	kar	2000.04	0.191406	0.220434	0.868316	0.385222	0.694357
FBgn0001297	kay	4585.58	0.0935919	0.116273	0.804933	0.420859	0.723093
FBgn0001301	kel	933.3	-0.088692	0.188261	-0.471111	0.637562	0.862719
FBgn0001308	Khc	4294.46	-0.0600598	0.128573	-0.467125	0.64041	0.863519
FBgn0001311	kkv	229.76	-2.75488	1.12511	-2.44855	NA	NA
FBgn0001313	kl-2	0.330838	0.212048	4.07815	0.0519962	0.958532	NA
FBgn0001316	klar	4236.36	-0.220167	0.166443	-1.32278	0.185908	0.500658
FBgn0001319	kn	269.667	-0.166649	0.192674	-0.864928	0.387078	0.695713
FBgn0001320	kni	421.236	-0.348773	0.143607	-2.42866	0.0151546	0.110525
FBgn0001321	knk	22.2027	-0.919968	0.450165	-2.04362	0.0409907	0.212403
FBgn0001323	knrl	357.047	-0.272747	0.18182	-1.5001	0.133589	0.421238
FBgn0001324	kto	1566.9	-0.173109	0.140181	-1.2349	0.216868	0.539138
FBgn0001325	Kr	66.6703	-0.491904	0.312852	-1.57232	0.115876	0.390484
FBgn0001330	kz	330.728	0.725425	0.179363	4.04445	5.24451e-05	0.00155018
FBgn0001341	Mybbp1A	353.69	0.708228	0.18876	3.75201	0.000175424	0.00416089
FBgn0001404	egh	3426.34	0.107957	0.115299	0.936325	0.349106	0.667398
FBgn0001491	l(1)10Bb	544.975	-0.168919	0.155446	-1.08667	0.277182	0.604367
FBgn0001565	Hlc	3185.8	-0.0401392	0.146627	-0.27375	0.784277	0.927344
FBgn0001612	Grip91	509.635	-0.0142931	0.144119	-0.0991753	0.920999	0.976757
FBgn0001624	dlg1	8690.46	-0.163201	0.164375	-0.992861	0.320778	0.645357
FBgn0001941	ifc	1353.45	-0.0754597	0.155732	-0.484548	0.627997	0.857442
FBgn0001942	eIF4A	33631.8	0.280926	0.166717	1.68505	0.0919785	0.34443
FBgn0001961	Arpc1	2569.42	-0.230788	0.135332	-1.70535	0.088129	0.335621
FBgn0001965	Sos	2458.65	-0.0211729	0.131988	-0.160415	0.872554	0.957858
FBgn0001970	Pgant35A	0.512517	-0.782975	3.56746	-0.219477	0.826279	NA
FBgn0001974	Rnmt	203.205	0.297195	0.184882	1.60748	0.107948	0.376275
FBgn0001977	CIAPIN1	444.867	-0.237853	0.135832	-1.75109	0.0799313	0.316326
FBgn0001978	stc	1486.38	0.120138	0.157682	0.761898	0.446121	0.740089
FBgn0001981	esg	18.3879	-0.444888	0.520368	-0.854949	0.392579	0.699827
FBgn0001986	Mtr4	655.533	0.622047	0.177593	3.50265	0.000460649	0.00909678
FBgn0001987	Gli	1712.53	0.959838	0.124987	7.67948	1.59736e-14	8.15489e-12
FBgn0001989	ND-B17	1905.27	-0.228366	0.218146	-1.04685	0.295171	0.620748
FBgn0001990	wek	288.688	0.22525	0.185283	1.21571	0.224097	0.5479
FBgn0001991	Ca-alpha1D	6771.58	-0.117635	0.194426	-0.605037	0.545154	0.807001
FBgn0001992	Cyp303a1	183.279	-0.508153	0.330357	-1.53819	0.124002	0.405012
FBgn0001994	crp	3561.75	0.116675	0.125238	0.931633	0.351526	0.669339
FBgn0001995	mRpL4	487.008	0.0945429	0.144857	0.652664	0.513973	0.788538
FBgn0002021	l(2)37Bb	741.057	-0.0518326	0.1339	-0.387101	0.698682	0.887252
FBgn0002022	Catsup	1366.44	0.326045	0.13494	2.41623	0.0156822	0.112236
FBgn0002023	Lim3	322.729	-0.28671	0.190663	-1.50376	0.132644	0.419556
FBgn0002031	l(2)37Cc	2496.68	0.29301	0.157169	1.8643	0.0622798	0.271071
FBgn0002036	CG10561	805.032	-0.170269	0.145307	-1.17178	0.241284	0.565351
FBgn0002044	swm	2710.92	0.0697954	0.118386	0.58956	0.555486	0.811578
FBgn0002069	AspRS	451.17	-0.0146268	0.254645	-0.0574398	0.954195	0.986555
FBgn0002121	l(2)gl	2417.63	0.358954	0.138202	2.59732	0.00939554	0.0787565
FBgn0002174	CG5504	1073.16	0.0738186	0.143539	0.514274	0.60706	0.841849
FBgn0002183	dre4	1536.16	0.0156818	0.182652	0.0858561	0.931581	0.98051
FBgn0002283	l(3)73Ah	529.474	-0.0279598	0.192988	-0.144878	0.884807	0.961291
FBgn0002284	Prosbeta6	1383	-0.191413	0.167027	-1.146	0.251795	0.5766
FBgn0002306	sas	1773.21	-0.347676	0.141174	-2.46275	0.0137876	0.10308
FBgn0002354	l(3)87Df	231.379	-0.0380396	0.20134	-0.188932	0.850146	0.95245
FBgn0002413	dco	2828.22	-0.11737	0.115607	-1.01525	0.309985	0.634427
FBgn0002431	hyd	6506.08	0.328067	0.135682	2.41791	0.0156097	0.111792
FBgn0002440	l(3)mbn	2.56782	-1.23367	1.45241	-0.849389	0.395665	NA
FBgn0002441	l(3)mbt	1555.13	-0.0383304	0.11522	-0.332672	0.739382	0.908883
FBgn0002466	sti	28.933	0.143007	0.431852	0.331149	0.740532	0.909159
FBgn0002521	pho	1072.09	0.124297	0.160255	0.775625	0.437971	0.734932
FBgn0002522	lab	66.1812	-0.37375	0.319141	-1.17111	0.241554	0.565351
FBgn0002524	lace	1051.28	-0.125674	0.135399	-0.928176	0.353316	0.670377
FBgn0002525	Lam	1082.61	0.165817	0.134812	1.22999	0.218701	0.54075
FBgn0002526	LanA	2507.77	-0.158217	0.224184	-0.705745	0.480347	0.766184
FBgn0002531	Lcp1	4.41753	0.0849184	0.983395	0.0863523	0.931186	NA
FBgn0002533	Lcp2	4.28057	-0.126204	1.03096	-0.122413	0.902572	NA
FBgn0002534	Lcp3	3.64503	0.651731	1.28298	0.507982	0.611466	NA
FBgn0002535	Lcp4	0.353291	2.05047	4.03984	0.507562	0.611761	NA
FBgn0002542	lds	139.671	0.784824	0.208363	3.76662	0.00016547	0.00402268
FBgn0002543	robo2	423.738	0.060117	0.198604	0.302697	0.762121	0.918468
FBgn0002552	lin	477.666	0.112993	0.168876	0.669093	0.503436	0.781544
FBgn0002562	Lsp1alpha	10.5899	0.837101	0.9666	0.866027	0.386476	0.695457
FBgn0002563	Lsp1beta	1673.83	0.213376	0.847009	0.251917	0.801105	0.935237
FBgn0002564	Lsp1gamma	12.6878	1.07836	0.765852	1.40805	0.159116	0.461549
FBgn0002565	Lsp2	141.503	1.00645	1.61046	0.624948	0.532005	0.801218
FBgn0002566	lt	1525.43	0.602574	0.16013	3.76302	0.00016787	0.00406702
FBgn0002567	Rab32	7562.14	-0.230523	0.265313	-0.868872	0.384917	0.694357
FBgn0002569	Mal-A2	4.39442	-1.3436	1.12055	-1.19905	0.230508	NA
FBgn0002570	Mal-A1	181.292	0.471764	0.227887	2.07017	0.0384366	0.204912
FBgn0002571	Mal-A3	0.744085	-0.349352	2.65246	-0.131709	0.895215	NA
FBgn0002573	sens	13.4715	-0.453534	0.626862	-0.723499	0.469373	0.758997
FBgn0002576	lz	768.436	-0.0135091	0.141937	-0.0951769	0.924174	0.978091
FBgn0002577	m	8.39266	0.460563	0.763199	0.603464	0.5462	0.807372
FBgn0002578	Kaz-m1	1.15464	-2.34164	2.07515	-1.12842	0.259141	NA
FBgn0002579	RpL36	22731.3	0.248182	0.196346	1.264	0.206229	0.52774
FBgn0002590	RpS5a	29926.5	0.373252	0.229139	1.62893	0.103327	0.367175
FBgn0002592	E(spl)m2-BFM	51.4913	-0.181091	0.359519	-0.503703	0.61447	0.847457
FBgn0002593	RpLP1	43031.5	0.369903	0.251615	1.47011	0.141531	0.434151
FBgn0002609	E(spl)m3-HLH	66.8499	-0.170044	0.283636	-0.599514	0.54883	0.809061
FBgn0002622	RpS3	31192.4	0.470811	0.213521	2.20498	0.0274552	0.16444
FBgn0002626	RpL32	24389.4	0.256273	0.251656	1.01835	0.308513	0.633529
FBgn0002632	E(spl)m6-BFM	1.89945	-0.790551	1.80014	-0.439162	0.660544	NA
FBgn0002633	E(spl)m7-HLH	3.48656	-0.196308	1.15673	-0.169709	0.865239	NA
FBgn0002638	Rcc1	737.915	0.0384312	0.136391	0.281772	0.778119	0.925133
FBgn0002641	mal	449.881	-0.180437	0.144156	-1.25167	0.210688	0.532985
FBgn0002643	mam	2738.94	0.00101515	0.117341	0.00865129	0.993097	0.997632
FBgn0002645	Map205	2594.39	-0.0118198	0.17295	-0.0683426	0.945513	0.984372
FBgn0002673	twe	48.4679	0.207491	0.386311	0.53711	0.591192	0.831236
FBgn0002707	mei-9	291.391	0.245143	0.157189	1.55954	0.118869	0.395407
FBgn0002709	mei-218	1.15852	-1.073	2.08376	-0.514934	0.606599	NA
FBgn0002715	mei-S332	60.0894	-0.0291615	0.310384	-0.0939529	0.925147	0.978445
FBgn0002716	mei-W68	26.1458	-0.517895	0.415984	-1.24499	0.213137	0.536268
FBgn0002719	Men	29045.6	0.106854	0.215636	0.495527	0.620228	0.851561
FBgn0002723	Met	1048.97	0.0557144	0.123044	0.452802	0.650691	0.868658
FBgn0002732	E(spl)malpha-BFM	4.68406	0.114133	0.983766	0.116016	0.90764	NA
FBgn0002733	E(spl)mbeta-HLH	212.814	-0.0375747	0.186597	-0.201368	0.840411	0.948784
FBgn0002735	E(spl)mgamma-HLH	0.53842	-1.00322	3.48859	-0.287573	0.773674	NA
FBgn0002736	mago	466.301	-0.0996852	0.180863	-0.551164	0.581521	0.826307
FBgn0002772	Mlc1	9915.35	-2.14417	0.92867	-2.30886	0.0209514	0.137214
FBgn0002773	Mlc2	23163	-1.96519	1.00536	-1.95471	NA	NA
FBgn0002774	mle	3184.92	0.0534086	0.101867	0.524295	0.600073	0.836374
FBgn0002775	msl-3	364.602	0.00144545	0.156328	0.00924628	0.992623	0.997371
FBgn0002778	mnd	951.352	0.150648	0.135049	1.11551	0.264633	0.590822
FBgn0002780	mod	2850.1	1.02011	0.136216	7.4889	6.94521e-14	2.86383e-11
FBgn0002781	mod(mdg4)	3493.99	-0.149849	0.121928	-1.229	0.219072	0.540978
FBgn0002783	mor	2152.37	-0.00297973	0.110481	-0.0269705	0.978483	0.992086
FBgn0002787	Rpn8	1847.78	-0.288643	0.128234	-2.25092	0.0243909	0.151416
FBgn0002789	Mp20	5922.23	-0.661871	0.147372	-4.49116	7.08348e-06	0.000295494
FBgn0002791	mr	486.145	0.10349	0.166128	0.622954	0.533315	0.802093
FBgn0002838	ms(3)K81	0.250345	-1.39092	4.06258	-0.342372	0.732071	NA
FBgn0002842	sa	0.793798	-3.02335	3.02565	-0.999238	0.317679	NA
FBgn0002862	Mst87F	6.9852	-1.19353	0.845347	-1.41188	0.157985	0.45951
FBgn0002868	MtnA	14056.8	-0.0987756	0.401909	-0.245766	0.805863	0.938481
FBgn0002869	MtnB	18.9226	-3.38245	0.886864	-3.81395	0.000136764	0.00335526
FBgn0002872	mu2	237.097	0.188125	0.168459	1.11674	0.264104	0.590355
FBgn0002873	mud	36.3199	-0.412141	0.51225	-0.804569	0.421068	0.723093
FBgn0002878	mus101	203.96	0.138677	0.199284	0.695877	0.486506	0.769083
FBgn0002887	mus201	397.903	0.100995	0.153636	0.657365	0.510946	0.786483
FBgn0002891	mus205	430.283	-0.231099	0.181609	-1.27251	0.203192	0.52391
FBgn0002899	mus301	62.7015	0.399796	0.370701	1.07848	0.280817	0.607926
FBgn0002901	mus304	107.824	0.061574	0.262407	0.234651	0.81448	0.940749
FBgn0002905	mus308	212.528	0.210954	0.234914	0.898003	0.369184	0.683536
FBgn0002906	Blm	194.938	0.046749	0.239992	0.194794	0.845554	0.951029
FBgn0002914	Myb	2082.84	-0.243222	0.146107	-1.66469	0.0959744	0.352377
FBgn0002917	na	3891.2	-0.0520467	0.162029	-0.321218	0.748045	0.911433
FBgn0002921	Atpalpha	85236.3	-0.136624	0.222315	-0.614553	0.53885	0.804774
FBgn0002922	nau	18.7915	-0.675106	0.525356	-1.28505	0.198776	0.517127
FBgn0002924	ncd	66.8295	-0.159365	0.323323	-0.492898	0.622084	0.853453
FBgn0002926	ndl	1.01556	2.41908	2.42562	0.997301	0.318619	NA
FBgn0002930	nec	6921.18	0.207469	0.122768	1.68993	0.0910409	0.341661
FBgn0002931	net	126.46	-0.228384	0.210546	-1.08472	0.278045	0.605515
FBgn0002932	neur	115.283	0.0151139	0.280215	0.0539368	0.956986	0.9872
FBgn0002937	ninaB	2562.34	0.430134	0.241578	1.78052	0.0749913	0.303275
FBgn0002938	ninaC	89242.8	-0.325497	0.240465	-1.35362	0.175859	0.487052
FBgn0002939	ninaD	146.82	-1.04199	0.862272	-1.20843	0.226884	0.550571
FBgn0002940	ninaE	633858	-0.184737	0.173387	-1.06546	0.286668	0.612712
FBgn0002941	slou	115.12	-0.170148	0.215673	-0.788916	0.430161	0.729363
FBgn0002945	nkd	1376.13	0.294311	0.129368	2.275	0.0229062	0.145226
FBgn0002948	nod	72.283	0.0969563	0.30303	0.319956	0.749002	0.911488
FBgn0002973	numb	1845.8	-0.29397	0.151142	-1.94499	0.0517765	0.243313
FBgn0002985	odd	58.6425	-0.193069	0.276081	-0.699321	0.484352	0.768156
FBgn0002989	okr	146.613	0.154844	0.202045	0.766382	0.443449	0.7391
FBgn0003002	opa	135.247	-0.210359	0.203871	-1.03183	0.302154	0.628207
FBgn0003008	or	343.452	0.12862	0.173066	0.743187	0.457369	0.74832
FBgn0003011	ort	590.556	0.0950011	0.148454	0.639935	0.522215	0.793574
FBgn0003015	osk	4.84356	-0.820418	1.26709	-0.647483	0.51732	NA
FBgn0003016	osp	2272.08	0.0350935	0.133257	0.263353	0.792279	0.931668
FBgn0003023	otu	6.711	1.03169	0.855043	1.2066	0.227588	0.551454
FBgn0003028	ovo	390.803	-0.179442	0.173874	-1.03203	0.30206	0.628207
FBgn0003041	pbl	493.698	0.275978	0.172884	1.59632	0.110417	0.380126
FBgn0003042	Pc	636.619	-0.225067	0.123118	-1.82805	0.0675414	0.284076
FBgn0003044	Pcl	732.409	-0.0230615	0.159361	-0.144712	0.884938	0.961322
FBgn0003046	Pcp	33.0881	-0.0902657	0.532504	-0.169512	0.865394	0.955764
FBgn0003048	pcx	1774.79	0.109957	0.178298	0.616702	0.537431	0.804075
FBgn0003053	peb	629.351	-0.136547	0.242252	-0.563659	0.572986	0.820706
FBgn0003057	CG10598	0.335871	-1.74873	4.02989	-0.43394	0.664332	NA
FBgn0003060	CG9757	154.647	-3.27507	1.0088	-3.2465	0.00116833	0.0183124
FBgn0003062	Fib	918.798	1.74228	0.208577	8.3532	6.64369e-17	7.91411e-14
FBgn0003065	CG2150	2.57193	-0.114094	1.54292	-0.073947	0.941053	NA
FBgn0003068	per	3466.09	-0.30518	0.145224	-2.10145	0.0356016	0.195235
FBgn0003071	Pfk	9169.9	-0.147188	0.234693	-0.627152	0.53056	0.800131
FBgn0003074	Pgi	14112.4	-0.073854	0.215197	-0.343192	0.731454	0.904894
FBgn0003076	Pgm1	12017.3	-0.15763	0.210156	-0.750064	0.453216	0.745103
FBgn0003079	Raf	1095.25	-0.0179017	0.121542	-0.147288	0.882905	0.960782
FBgn0003082	phr	761.384	0.0335547	0.19824	0.169263	0.86559	0.955764
FBgn0003086	Pig1	0.711388	-2.8559	3.0641	-0.932052	0.35131	NA
FBgn0003087	pim	7.35714	-1.28055	0.798595	-1.6035	0.108824	0.378103
FBgn0003089	pip	45.0291	-2.11822	0.84193	-2.51591	0.0118724	0.0929939
FBgn0003090	pk	537.701	-0.0525464	0.220223	-0.238605	0.811412	0.939545
FBgn0003091	Pkc53E	3895.54	-0.0808593	0.139368	-0.580187	0.561789	0.814832
FBgn0003093	Pkc98E	5225.68	-0.107646	0.129204	-0.833152	0.404759	0.710016
FBgn0003116	pn	685.173	0.212285	0.207426	1.02343	0.306105	0.6322
FBgn0003117	pnr	148.968	-0.367482	0.32416	-1.13365	0.256943	0.581281
FBgn0003118	pnt	760.293	0.303121	0.135539	2.23641	0.0253249	0.154971
FBgn0003124	polo	6.16991	-0.0365211	0.883826	-0.0413216	0.96704	0.98968
FBgn0003129	Poxm	11.9884	0.140572	0.565928	0.248392	0.803831	0.936827
FBgn0003130	Poxn	35.0364	-0.261991	0.371431	-0.705357	0.480588	0.766184
FBgn0003132	Pp1-13C	7.50081	0.0719964	0.759727	0.0947662	0.924501	0.9782
FBgn0003134	Pp1alpha-96A	3636.41	-0.271463	0.13102	-2.07192	0.0382727	0.204445
FBgn0003137	Ppn	22699.5	0.104311	0.209518	0.497862	0.618581	0.850559
FBgn0003139	PpV	792.305	-0.0661488	0.123435	-0.535901	0.592027	0.831812
FBgn0003141	pr	1636.35	-0.198424	0.221589	-0.895459	0.370542	0.683984
FBgn0003145	prd	1.33163	0.256022	1.91147	0.13394	0.89345	NA
FBgn0003149	Prm	9960.82	-1.8099	0.905632	-1.9985	0.0456627	0.225662
FBgn0003159	CG2841	2653.63	-0.239799	0.169576	-1.41411	0.157331	0.458106
FBgn0003162	Pu	2920.78	-0.447271	0.293303	-1.52495	0.127273	0.410327
FBgn0003165	pum	4585.61	0.0801514	0.13373	0.599353	0.548937	0.809061
FBgn0003169	put	1717.86	0.126745	0.123095	1.02965	0.303173	0.62941
FBgn0003174	pwn	255.012	-0.589383	0.273016	-2.15879	0.0308668	0.177534
FBgn0003175	px	3629.56	0.102112	0.1175	0.86904	0.384825	0.694357
FBgn0003187	qua	32.6208	-0.119282	0.388573	-0.306976	0.758862	0.916595
FBgn0003189	r	2049.66	0.402389	0.220414	1.82561	0.0679098	0.285112
FBgn0003204	ras	3549.07	0.287997	0.197184	1.46055	0.144139	0.439383
FBgn0003205	Ras85D	1581.77	0.00967417	0.159455	0.0606702	0.951622	0.985952
FBgn0003206	Ras64B	979.747	-0.216712	0.116144	-1.86589	0.0620564	0.270757
FBgn0003209	raw	3112.23	-0.246015	0.12973	-1.89636	0.0579126	0.259289
FBgn0003210	rb	1735.2	0.182283	0.136073	1.33959	0.180379	0.493538
FBgn0003218	rdgB	6071.7	-0.0295563	0.155527	-0.19004	0.849278	0.95245
FBgn0003227	rec	31.768	0.148451	0.444511	0.333964	0.738407	0.908163
FBgn0003231	ref(2)P	10579.2	-0.121422	0.205582	-0.590628	0.55477	0.811578
FBgn0003248	Rh2	6540.7	-0.0366293	0.146258	-0.250442	0.802246	0.935691
FBgn0003249	Rh3	16848.1	-0.221663	0.107535	-2.0613	0.0392747	0.207334
FBgn0003250	Rh4	26054.6	-0.52804	0.14136	-3.73542	0.000187403	0.00440602
FBgn0003254	rib	23.9079	-0.332995	0.424272	-0.784862	0.432534	0.730802
FBgn0003255	rk	201.564	-0.063497	0.21817	-0.291044	0.771018	0.921909
FBgn0003256	rl	3096.68	0.0917934	0.0996381	0.921268	0.356911	0.673416
FBgn0003257	r-l	267.293	0.483904	0.316094	1.53089	0.125798	0.407825
FBgn0003261	Rm62	21496.4	0.182504	0.118624	1.53851	0.123923	0.405012
FBgn0003267	ro	7.86212	-0.438593	0.743928	-0.589564	0.555483	0.811578
FBgn0003268	rod	242.748	0.25929	0.222319	1.16629	0.243495	0.566701
FBgn0003270	amos	1.19703	2.64059	2.08864	1.26427	0.206135	NA
FBgn0003274	RpLP2	28022.3	0.565527	0.190148	2.97414	0.00293811	0.0353927
FBgn0003275	RpII18	361.86	0.472841	0.21484	2.2009	0.0277434	0.165611
FBgn0003277	RpII215	2758.22	0.183657	0.163238	1.12509	0.260552	0.584843
FBgn0003278	RpI135	427.083	1.09677	0.206311	5.3161	1.06015e-07	8.9495e-06
FBgn0003279	RpL4	50656.8	0.416224	0.233533	1.78229	0.0747013	0.302428
FBgn0003285	rst	354.276	-0.287946	0.159536	-1.80489	0.071092	0.29371
FBgn0003292	rt	262.781	-0.336884	0.187406	-1.79761	0.0722382	0.296503
FBgn0003295	ru	155.683	-0.581732	0.27408	-2.12249	0.0337969	0.18921
FBgn0003300	run	60.944	-0.0224371	0.323615	-0.0693326	0.944725	0.984113
FBgn0003301	rut	5832.61	-0.0815537	0.198121	-0.411635	0.680607	0.879714
FBgn0003302	rux	263.179	-0.0695535	0.186899	-0.372145	0.709785	0.893705
FBgn0003308	ry	1666.7	0.758655	0.217543	3.48737	0.000487794	0.00949117
FBgn0003310	S	1425.32	0.188436	0.107181	1.75811	0.0787281	0.31284
FBgn0003312	sad	20.6282	-0.347312	0.514907	-0.674513	0.499985	0.778553
FBgn0003317	sax	1121.24	0.00738456	0.119682	0.0617014	0.950801	0.985835
FBgn0003319	Sb	15.0099	-1.79088	0.56908	-3.14698	0.00164969	0.0234878
FBgn0003321	sbr	4033.93	0.0585382	0.152296	0.38437	0.700704	0.888078
FBgn0003326	sca	430.617	-0.0513429	0.184059	-0.278948	0.780284	0.926675
FBgn0003328	scb	1145.5	-0.152404	0.166691	-0.914294	0.360563	0.67475
FBgn0003330	Sce	439.188	-0.162889	0.155829	-1.0453	0.295883	0.62138
FBgn0003334	Scm	1495.23	0.0157093	0.12787	0.122854	0.902223	0.969892
FBgn0003339	Scr	447.999	-0.349936	0.169626	-2.06299	0.0391134	0.206977
FBgn0003345	sd	2844.13	-0.0699537	0.151257	-0.462483	0.643735	0.865437
FBgn0003346	RanGAP	319.456	0.0637007	0.195952	0.325084	0.745118	0.911066
FBgn0003353	sei	1383.83	-0.151117	0.147949	-1.02142	0.307058	0.632898
FBgn0003356	Jon99Cii	32.4984	-3.48536	1.63491	-2.13184	0.0330201	0.186206
FBgn0003357	Jon99Ciii	29.7424	-3.36145	0.97644	-3.44255	0.000576256	0.0107783
FBgn0003358	Jon99Ci	1.9872	-0.144987	1.71769	-0.0844079	0.932732	NA
FBgn0003360	sesB	44528.7	-0.336984	0.32995	-1.02132	0.307104	0.632898
FBgn0003366	sev	4443.39	-0.165643	0.2206	-0.750875	0.452728	0.744963
FBgn0003371	sgg	10636.1	-0.0275755	0.130804	-0.210816	0.833031	0.946557
FBgn0003372	Sgs1	75.6647	-0.230258	0.539943	-0.426449	0.66978	0.877756
FBgn0003374	Sgs4	3.89173	-5.29078	2.62962	-2.012	0.04422	NA
FBgn0003380	Sh	13280.1	-0.244113	0.186015	-1.31233	0.18941	0.504889
FBgn0003382	sha	1.5093	2.03088	1.97506	1.02826	0.303827	NA
FBgn0003386	Shaw	2277.01	0.0176901	0.131441	0.134586	0.892939	0.964652
FBgn0003388	shd	152.977	0.891367	0.354035	2.51774	0.0118111	0.0929559
FBgn0003390	shf	1181.88	-0.6636	0.2703	-2.45505	0.0140866	0.104514
FBgn0003391	shg	2661.77	0.124913	0.147681	0.845829	0.397648	0.703635
FBgn0003392	shi	14560.5	-0.0703497	0.198339	-0.354693	0.722819	0.900767
FBgn0003396	shn	2914.06	0.211494	0.151014	1.4005	0.161364	0.465049
FBgn0003401	shu	8.75269	0.413965	0.683283	0.605847	0.544616	0.807001
FBgn0003410	sina	1071.69	-0.144948	0.137337	-1.05542	0.291234	0.617913
FBgn0003411	sisA	0.623946	-1.25747	2.80081	-0.448967	0.653456	NA
FBgn0003415	skd	3811	0.155059	0.157928	0.981834	0.326181	0.648965
FBgn0003416	sl	470.953	0.298279	0.151975	1.96268	0.0496831	0.236735
FBgn0003423	slgA	8467.78	-0.246816	0.199631	-1.23636	0.216325	0.538892
FBgn0003429	slo	11404.6	0.233967	0.138226	1.69264	0.0905241	0.340637
FBgn0003430	slp1	311.588	0.576739	0.164066	3.51529	0.000439272	0.0087536
FBgn0003435	sm	5672.34	-0.065364	0.184991	-0.353336	0.723836	0.901097
FBgn0003444	smo	399.523	0.221982	0.167768	1.32315	0.185786	0.500581
FBgn0003447	sn	2290.59	-0.334421	0.13104	-2.55206	0.0107089	0.0869114
FBgn0003448	sna	0.377487	2.13217	3.86945	0.551028	0.581615	NA
FBgn0003449	snf	842.953	-0.0800703	0.133727	-0.59876	0.549333	0.809061
FBgn0003450	snk	1.5571	1.09622	2.18945	0.500681	0.616595	NA
FBgn0003459	stwl	413.018	0.150295	0.179899	0.835441	0.403469	0.708533
FBgn0003460	so	703.836	0.0570417	0.124566	0.457922	0.647009	0.867398
FBgn0003462	Sod1	8249.79	-0.155072	0.136344	-1.13736	0.25539	0.580177
FBgn0003463	sog	2303.51	0.145905	0.17888	0.815657	0.414696	0.719779
FBgn0003464	sol	3563.67	-0.117745	0.172963	-0.680753	0.496028	0.775993
FBgn0003475	spir	5879.1	-0.129337	0.135161	-0.956905	0.338615	0.658303
FBgn0003479	spn-A	122.126	0.360816	0.245089	1.47218	0.140971	0.433548
FBgn0003480	spn-B	62.2827	0.40633	0.314934	1.29021	0.196979	0.514199
FBgn0003482	spn-D	4.5421	0.0126964	1.25899	0.0100846	0.991954	NA
FBgn0003483	spn-E	82.1845	-0.290166	0.326987	-0.887394	0.374867	0.685593
FBgn0003495	spz	1368.67	0.223402	0.168757	1.32381	0.185566	0.500491
FBgn0003499	sr	467.248	0.170624	0.248889	0.685543	0.493001	0.773747
FBgn0003502	Btk29A	1203.03	0.0962293	0.119149	0.807642	0.419297	0.722628
FBgn0003507	srp	2258.52	0.73986	0.122932	6.01843	1.76117e-09	2.36018e-07
FBgn0003512	Sry-delta	440.452	-0.14692	0.231103	-0.635733	0.52495	0.795631
FBgn0003513	ss	151.153	0.139265	0.221366	0.629116	0.529273	0.799202
FBgn0003514	sqh	2669.82	-0.334529	0.116463	-2.8724	0.00407369	0.0436304
FBgn0003515	st	491.432	0.019802	0.146788	0.134902	0.89269	0.964479
FBgn0003517	sta	36565.2	0.480396	0.230403	2.08503	0.0370668	0.2004
FBgn0003520	stau	4054.61	-0.157442	0.183059	-0.860061	0.389756	0.697529
FBgn0003525	stg	25.6327	-0.294841	0.502541	-0.586699	0.557406	0.812936
FBgn0003545	sub	1.25203	-1.31524	1.81466	-0.724788	0.468582	NA
FBgn0003557	Su(dx)	3357.56	-0.00749748	0.110254	-0.0680022	0.945784	0.984372
FBgn0003559	su(f)	1161.27	0.0889209	0.129455	0.686884	0.492156	0.773246
FBgn0003567	su(Hw)	759.349	-0.0324027	0.123768	-0.261802	0.793474	0.93245
FBgn0003575	su(sable)	1807.79	-0.00299617	0.104525	-0.0286648	0.977132	0.99203
FBgn0003598	Su(var)3-7	1002.18	0.116482	0.138908	0.838554	0.40172	0.706918
FBgn0003607	Su(var)205	1388.04	-0.124312	0.183391	-0.677855	0.497864	0.776829
FBgn0003612	Su(var)2-10	2098.25	0.0526109	0.120349	0.437153	0.662	0.873933
FBgn0003638	su(w[a])	11845.1	0.00659516	0.138865	0.0474933	0.96212	0.989058
FBgn0003651	svp	2679.34	0.39229	0.179907	2.18052	0.0292189	0.171553
FBgn0003654	sw	2964.85	-0.152553	0.111928	-1.36296	0.172896	0.48265
FBgn0003655	swa	6.56443	-0.104437	1.04416	-0.10002	0.920328	0.976322
FBgn0003656	sws	5426.08	0.15033	0.104785	1.43464	0.151389	0.448639
FBgn0003660	Syb	2412.37	-0.250049	0.171844	-1.45509	0.145645	0.440772
FBgn0003676	CCT1	1982.89	0.0693409	0.222165	0.312114	0.754954	0.914903
FBgn0003683	term	4.07473	-0.266289	1.28162	-0.207776	0.835404	NA
FBgn0003687	Tbp	296.316	0.112237	0.197713	0.567676	0.570255	0.819047
FBgn0003701	thr	20.8361	-0.162155	0.582726	-0.27827	0.780805	0.926758
FBgn0003710	tipE	1038.63	-0.103858	0.203781	-0.509653	0.610295	0.844472
FBgn0003714	tko	432.824	0.114767	0.153122	0.749516	0.453546	0.745103
FBgn0003716	tkv	2129.49	0.0775193	0.10276	0.754376	0.450623	0.743137
FBgn0003719	tld	193.463	-0.106746	0.358504	-0.297754	0.765891	0.919664
FBgn0003720	tll	0.940103	0.496809	2.50172	0.198587	0.842586	NA
FBgn0003721	Tm1	10556.9	-1.10982	0.350436	-3.16698	0.0015403	0.0222856
FBgn0003731	Egfr	5960.62	0.479354	0.146933	3.2624	0.00110475	0.0174984
FBgn0003733	tor	8.54215	-1.3014	0.818069	-1.59082	0.11165	0.382321
FBgn0003741	tra	561.404	-0.228633	0.21323	-1.07224	0.283613	0.609987
FBgn0003742	tra2	494.212	0.219212	0.157246	1.39407	0.163297	0.468087
FBgn0003744	trc	2043.33	-0.135719	0.104435	-1.29956	0.193753	0.509494
FBgn0003747	Gr5a	5.39438	0.807015	0.975525	0.827262	0.408089	0.713656
FBgn0003748	Treh	10114.9	0.192389	0.160229	1.20071	0.229864	0.553418
FBgn0003751	trk	36.8012	-0.651979	0.364428	-1.78905	0.073607	0.299533
FBgn0003861	trp	63509.3	-0.592499	0.171037	-3.46417	0.000531875	0.0100609
FBgn0003862	trx	4636.11	0.0933987	0.189556	0.492723	0.622209	0.853453
FBgn0003863	alphaTry	18.0003	-3.75911	3.18984	-1.17846	0.238612	0.562088
FBgn0003866	tsh	299.802	-0.288745	0.158997	-1.81604	0.0693644	0.288574
FBgn0003867	tsl	2006.41	0.199074	0.176172	1.13	0.258475	0.583147
FBgn0003870	ttk	2461.23	-0.164218	0.122784	-1.33745	0.181076	0.494394
FBgn0003882	tub	1136.81	-0.0604982	0.130495	-0.463607	0.642929	0.865133
FBgn0003884	alphaTub84B	21304.1	-0.391233	0.163752	-2.38918	0.0168861	0.118247
FBgn0003885	alphaTub84D	2502.59	-0.116421	0.161537	-0.720711	0.471088	0.759478
FBgn0003886	alphaTub85E	8.59071	1.12227	0.775398	1.44735	0.147799	0.443783
FBgn0003888	betaTub60D	709.095	-0.807479	0.356168	-2.26713	0.0233821	0.14694
FBgn0003889	betaTub85D	25.7516	0.079429	0.464176	0.171118	0.864131	0.955186
FBgn0003890	betaTub97EF	3373.76	-0.409485	0.169588	-2.41459	0.0157528	0.112591
FBgn0003891	tud	14524.6	0.367558	0.173308	2.12083	0.0339358	0.189789
FBgn0003892	ptc	266.368	0.115354	0.168044	0.686454	0.492427	0.773246
FBgn0003896	tup	570.054	-0.244159	0.129293	-1.88842	0.0589702	0.261897
FBgn0003900	twi	9.93842	-0.741067	0.684967	-1.0819	0.279296	0.606386
FBgn0003916	snRNA:U1:21D	8.58432	0.0256148	0.762885	0.0335762	0.973215	0.990782
FBgn0003920	snRNA:U2:14B	7.33785	1.11559	0.785604	1.42005	0.155594	0.455274
FBgn0003922	snRNA:U2:38ABa	10.4069	1.26928	0.670875	1.89198	0.0584938	0.260814
FBgn0003923	snRNA:U2:38ABb	0.50266	1.16318	3.0073	0.386787	0.698914	NA
FBgn0003930	snRNA:U4:39B	12.2778	-0.925792	0.638816	-1.44923	0.147273	0.442894
FBgn0003934	snRNA:U5:23D	0.64665	-1.27678	2.43548	-0.52424	0.600112	NA
FBgn0003935	snRNA:U5:34A	1.98335	-0.868618	1.52601	-0.569208	0.569215	NA
FBgn0003941	RpL40	28140.6	0.228511	0.210865	1.08369	0.278504	0.605558
FBgn0003942	RpS27A	24343.8	0.482191	0.210242	2.29351	0.0218189	0.140568
FBgn0003943	Ubi-p63E	76777.7	-0.225071	0.126979	-1.77251	0.0763099	0.306526
FBgn0003944	Ubx	10.8665	0.192344	0.623311	0.308585	0.757637	0.916362
FBgn0003950	unc	28.5247	-0.908133	0.483287	-1.87908	0.0602342	0.265531
FBgn0003963	ush	717.729	-0.155217	0.154926	-1.00187	0.316404	0.640999
FBgn0003964	usp	1466.6	-0.166628	0.127016	-1.31186	0.189567	0.505061
FBgn0003965	v	1200.28	0.713365	0.346288	2.06003	0.0393953	0.207649
FBgn0003969	vap	1678.27	0.0178744	0.130431	0.137041	0.890999	0.963377
FBgn0003975	vg	63.632	-0.294975	0.267423	-1.10303	0.270016	0.595558
FBgn0003977	vir	933.067	-0.00406033	0.146168	-0.0277786	0.977839	0.992077
FBgn0003978	vls	202.898	0.0101455	0.184462	0.0550007	0.956138	0.987192
FBgn0003979	Vm26Aa	0.427242	-2.1202	3.67302	-0.577236	0.56378	NA
FBgn0003980	Vm26Ab	1.3276	-3.73068	2.16887	-1.72011	0.0854132	NA
FBgn0003983	Vm34Ca	0.824788	-0.352516	2.29222	-0.153788	0.877777	NA
FBgn0003984	vn	412.388	-0.0306069	0.216706	-0.141237	0.887682	0.962592
FBgn0003996	w	3335.03	-0.079599	0.193187	-0.412031	0.680316	0.879668
FBgn0003997	hid	480.911	-0.108892	0.198884	-0.547514	0.584026	0.827678
FBgn0004003	wbl	167.497	-0.114123	0.196492	-0.580801	0.561375	0.81459
FBgn0004034	y	59.5382	-0.390729	0.344188	-1.13522	0.256283	0.580768
FBgn0004045	Yp1	323548	0.805062	0.319206	2.52208	0.0116663	0.0922379
FBgn0004047	Yp3	897163	0.622449	0.362074	1.71912	0.0855921	0.32982
FBgn0004049	yrt	1357.79	-0.156259	0.130566	-1.19679	0.231389	0.554493
FBgn0004050	z	976.867	-0.211532	0.147802	-1.43118	0.152378	0.450039
FBgn0004053	zen	0.41828	-2.09416	3.69621	-0.56657	0.571007	NA
FBgn0004054	zen2	1.64625	0.0726016	1.89883	0.0382349	0.9695	NA
FBgn0004055	uzip	3812.52	0.231422	0.13993	1.65385	0.0981589	0.356491
FBgn0004057	Zw	1029.79	0.240405	0.235995	1.01869	0.308352	0.633529
FBgn0004066	Prosalpha4	1117.74	0.130031	0.187624	0.693039	0.488285	0.770179
FBgn0004087	Dhfr	264.691	0.318466	0.186611	1.70657	0.0879016	0.335013
FBgn0004101	bs	422.907	-0.0898618	0.145719	-0.616679	0.537446	0.804075
FBgn0004102	oc	901.481	-0.284687	0.145913	-1.95108	0.0510477	0.2412
FBgn0004103	Pp1-87B	6836.93	-0.108319	0.112719	-0.960966	0.336569	0.656543
FBgn0004106	Cdk1	17.1712	0.431466	0.51921	0.831004	0.405971	0.711295
FBgn0004107	Cdk2	134.974	0.0661627	0.196023	0.337524	0.735722	0.906733
FBgn0004108	Nrt	1138.91	-0.0681952	0.141038	-0.483525	0.628723	0.857903
FBgn0004110	tin	3.64781	1.11805	1.26298	0.885252	0.376021	NA
FBgn0004117	Tm2	8843.57	-1.51579	0.670376	-2.2611	0.0237533	0.148576
FBgn0004118	nAChRbeta2	1580.6	-0.0955333	0.113316	-0.843067	0.399191	0.705527
FBgn0004132	boca	548.205	0.287889	0.170704	1.68648	0.0917037	0.34364
FBgn0004133	blow	717.983	0.0559151	0.129123	0.433038	0.664987	0.875194
FBgn0004167	kst	10324.4	-0.223262	0.174051	-1.28274	0.199585	0.517983
FBgn0004168	5-HT1A	1170.64	-0.0905264	0.154224	-0.58698	0.557217	0.812779
FBgn0004169	up	11515.3	-1.6079	0.763123	-2.107	0.0351178	0.193931
FBgn0004171	Mst98Cb	0.293108	-1.57432	4.0454	-0.389163	0.697156	NA
FBgn0004177	mts	7478.78	0.0307967	0.0953034	0.323144	0.746586	0.911184
FBgn0004179	Csp	6499.07	-0.362403	0.15568	-2.32787	0.0199188	0.133302
FBgn0004183	snRNA:U1:82Eb	3.66529	0.274621	1.07417	0.25566	0.798214	NA
FBgn0004185	snRNA:U1:95Ca	9.06278	0.0946334	0.741494	0.127625	0.898445	0.967772
FBgn0004186	snRNA:U1:95Cb	9.49463	-0.0250819	0.757899	-0.033094	0.9736	0.990883
FBgn0004187	snRNA:U1:95Cc	3.29924	0.0418262	1.15977	0.0360643	0.971231	NA
FBgn0004188	snRNA:U6:96Aa	9.99913	0.433948	0.732291	0.59259	0.553456	0.811314
FBgn0004189	snRNA:U6:96Ab	9.65958	0.343789	0.762294	0.450993	0.651995	0.868759
FBgn0004190	snRNA:U6:96Ac	9.84997	0.393831	0.75145	0.524094	0.600213	0.836384
FBgn0004191	snRNA:U2:34ABa	13.228	0.494437	0.555174	0.890599	0.373144	0.684615
FBgn0004192	snRNA:U2:34ABb	45.3959	0.446808	0.334818	1.33448	0.182046	0.495611
FBgn0004197	Ser	94.0112	-0.765721	0.296722	-2.5806	0.00986275	0.0819971
FBgn0004198	ct	3310.9	-0.180659	0.204055	-0.885344	0.375971	0.686792
FBgn0004227	nonA	3434.34	0.0210343	0.110818	0.189809	0.849459	0.95245
FBgn0004228	mex1	2.59983	-0.296252	1.45171	-0.204071	0.838298	NA
FBgn0004237	Hrb87F	2956.17	-0.109487	0.136049	-0.804763	0.420957	0.723093
FBgn0004240	DptA	6005.66	5.67045	1.80991	3.133	0.00173031	0.0242176
FBgn0004242	Syt1	21921.3	-0.229575	0.177026	-1.29684	0.194685	0.511072
FBgn0004244	Rdl	7179.54	-0.174881	0.205329	-0.851711	0.394375	0.701292
FBgn0004359	T48	719.533	0.766107	0.189735	4.03777	5.39624e-05	0.00158502
FBgn0004360	Wnt2	46.5955	-0.555911	0.418957	-1.32689	0.184544	0.498711
FBgn0004362	HmgD	1286.19	-0.258203	0.168927	-1.52848	0.126392	0.408395
FBgn0004363	porin	20324	-0.186934	0.218544	-0.855361	0.392351	0.699551
FBgn0004364	18w	2296.31	0.269037	0.109012	2.46797	0.0135883	0.102017
FBgn0004367	mei-41	244.34	0.284256	0.165828	1.71416	0.0864996	0.331675
FBgn0004368	Ptp4E	3166.12	0.0883099	0.153069	0.576928	0.563988	0.815444
FBgn0004369	Ptp99A	3465.2	0.15086	0.158088	0.954281	0.339941	0.659044
FBgn0004370	Ptp10D	2701.41	-0.143607	0.164544	-0.872755	0.382797	0.692185
FBgn0004373	fwd	4671.61	0.109631	0.110543	0.991749	0.32132	0.645827
FBgn0004374	neb	47.9191	0.22358	0.425517	0.525431	0.599284	0.836172
FBgn0004378	Klp61F	7.53579	0.624458	0.780724	0.799845	0.423801	0.724883
FBgn0004379	Klp67A	23.5211	-0.223847	0.436332	-0.513019	0.607938	0.842298
FBgn0004380	Klp64D	1482.18	-0.224411	0.126177	-1.77854	0.0753147	0.304208
FBgn0004381	Klp68D	1401.02	-0.141838	0.119831	-1.18365	0.23655	0.560207
FBgn0004387	Klp98A	2311.13	-0.0453076	0.151385	-0.299287	0.764721	0.919226
FBgn0004390	RasGAP1	1526.91	0.09778	0.131973	0.74091	0.458748	0.749274
FBgn0004391	shtd	516.366	0.029062	0.168096	0.172889	0.862739	0.954533
FBgn0004394	pdm2	132.913	-0.0383534	0.205126	-0.186975	0.85168	0.952545
FBgn0004395	unk	1314.67	0.000410601	0.147255	0.00278836	0.997775	0.998646
FBgn0004396	CrebA	843.833	0.421487	0.161647	2.60745	0.0091219	0.077187
FBgn0004397	Vinc	5475.19	-0.139699	0.110281	-1.26675	0.205244	0.526794
FBgn0004400	rhi	1.84927	1.17973	1.59252	0.740791	0.45882	NA
FBgn0004401	Pep	9885.58	-0.0633626	0.132547	-0.478038	0.632623	0.860774
FBgn0004403	RpS14a	20402.2	0.400086	0.233286	1.715	0.0863453	0.331202
FBgn0004404	RpS14b	8218.48	0.408339	0.216048	1.89003	0.0587535	0.261368
FBgn0004406	tam	212.991	-0.458827	0.298849	-1.53531	0.124707	0.406349
FBgn0004419	me31B	2016.49	0.14907	0.119674	1.24564	0.212896	0.535919
FBgn0004425	LysB	0.628083	-1.16751	2.78152	-0.419736	0.674678	NA
FBgn0004426	LysC	0.957932	-3.26792	2.82813	-1.15551	0.247882	NA
FBgn0004427	LysD	3.39171	-1.09974	1.50149	-0.732432	0.463905	NA
FBgn0004428	LysE	1.06212	0.105646	1.93198	0.0546829	0.956391	NA
FBgn0004429	LysP	4.32	-0.945806	1.22593	-0.7715	0.440411	NA
FBgn0004430	LysS	6.50608	-2.40026	1.03746	-2.3136	0.0206897	0.136249
FBgn0004431	LysX	8.25732	0.307706	0.748165	0.411281	0.680866	0.879714
FBgn0004432	Cyp1	16375.5	0.199104	0.135543	1.46894	0.14185	0.434754
FBgn0004435	Galphaq	2274.28	0.141816	0.120316	1.17869	0.238521	0.562056
FBgn0004436	Ubc6	3240.28	-0.136585	0.1339	-1.02005	0.307705	0.63303
FBgn0004449	Ten-m	8153.67	-0.011277	0.195913	-0.0575612	0.954098	0.986555
FBgn0004456	mew	1049.95	-0.247472	0.158978	-1.55665	0.119554	0.3967
FBgn0004463	RpIII128	653.123	0.405691	0.153132	2.64929	0.00806607	0.0707644
FBgn0004465	Su(P)	829.371	0.327958	0.137177	2.39076	0.0168134	0.117892
FBgn0004507	GlyP	21885.5	-1.17679	0.701153	-1.67836	0.0932765	0.34759
FBgn0004509	Fur1	3602.36	-0.0126132	0.115375	-0.109324	0.912946	0.97389
FBgn0004510	Ets97D	278.976	0.0250011	0.182157	0.13725	0.890833	0.963377
FBgn0004511	dy	34.7828	-0.310603	0.589442	-0.526944	0.598232	0.835717
FBgn0004512	Mdr49	1174.18	0.251129	0.149552	1.67921	0.0931104	0.347334
FBgn0004513	Mdr65	2856.58	0.641351	0.279951	2.29094	0.0219666	0.141066
FBgn0004514	Oct-TyrR	351.389	-0.055348	0.169802	-0.325957	0.744457	0.910689
FBgn0004516	Gad1	10483.6	-0.534546	0.262809	-2.03397	0.0419548	0.214559
FBgn0004552	Akh	4.99615	0.160957	0.913438	0.17621	0.860129	NA
FBgn0004554	Edg91	8.36336	-2.27134	0.912564	-2.48896	0.0128116	0.0978522
FBgn0004556	Dbp73D	319.613	1.19693	0.193992	6.17	6.82917e-10	1.0611e-07
FBgn0004567	slp2	268.912	0.711559	0.182079	3.90796	9.3079e-05	0.00248265
FBgn0004569	aos	699.987	0.141632	0.149819	0.945357	0.344477	0.662599
FBgn0004573	5-HT7	467.01	-0.161513	0.15714	-1.02783	0.304029	0.629639
FBgn0004574	Rop	7840.22	-0.136238	0.151586	-0.898751	0.368786	0.683292
FBgn0004575	Syn	10374.7	0.476947	0.165284	2.88563	0.00390633	0.0423885
FBgn0004577	Pxd	42.0381	-4.52121	1.97741	-2.28643	NA	NA
FBgn0004580	Cbp53E	6373.13	-0.134253	0.230973	-0.581251	0.561072	0.81459
FBgn0004581	bgcn	8.8818	0.898473	0.757847	1.18556	0.235796	0.559162
FBgn0004583	ex	1201.76	-0.263467	0.142674	-1.84663	0.0648005	0.276894
FBgn0004584	Rrp1	231.172	-0.180335	0.194756	-0.925951	0.354471	0.670955
FBgn0004587	B52	11790.2	0.0497244	0.107576	0.462224	0.643921	0.865531
FBgn0004595	pros	8271.21	-0.079442	0.188003	-0.422556	0.672619	0.878472
FBgn0004597	CycC	275.087	0.24943	0.166511	1.49798	0.13414	0.422109
FBgn0004598	Fur2	4854.08	0.098539	0.169115	0.582674	0.560112	0.814122
FBgn0004606	zfh1	1208.79	0.0447678	0.145304	0.308098	0.758008	0.916489
FBgn0004607	zfh2	2738.12	0.265095	0.181364	1.46168	0.14383	0.438691
FBgn0004611	Plc21C	6033.68	0.0902347	0.126416	0.713789	0.475357	0.762479
FBgn0004618	gl	1475.9	-0.400861	0.122445	-3.2738	0.00106112	0.017005
FBgn0004619	GluRIA	919.969	-0.122953	0.164047	-0.749496	0.453558	0.745103
FBgn0004620	GluRIIA	276.468	-0.202142	0.192177	-1.05186	0.292865	0.618891
FBgn0004622	TkR99D	411.656	-0.00514222	0.170462	-0.0301664	0.975934	0.991606
FBgn0004623	Gbeta76C	19894.8	-0.643215	0.199166	-3.22954	0.0012399	0.0191266
FBgn0004629	Cys	1.1835	1.57543	2.06558	0.762707	0.445638	NA
FBgn0004635	rho	660.293	0.776228	0.166934	4.6499	3.32093e-06	0.000152806
FBgn0004636	Rap1	3232.71	-0.0437336	0.146857	-0.297797	0.765858	0.919664
FBgn0004638	drk	1359.23	0.0962812	0.193273	0.498163	0.618369	0.850377
FBgn0004643	Zw10	589.887	0.037467	0.14565	0.257239	0.796994	0.933505
FBgn0004644	hh	62.9331	0.00101159	0.285428	0.0035441	0.997172	0.998646
FBgn0004646	ogre	3877.3	0.28558	0.210521	1.35654	0.174928	0.485478
FBgn0004647	N	1489.15	0.120197	0.2015	0.596511	0.550834	0.810218
FBgn0004648	svr	7761.72	0.0327832	0.113185	0.289644	0.772089	0.922188
FBgn0004649	yl	1.50524	-0.827245	1.81051	-0.456912	0.647734	NA
FBgn0004650	fs(1)N	4.0283	-0.125648	1.05868	-0.118684	0.905526	NA
FBgn0004652	fru	3194.29	-0.104545	0.158882	-0.658005	0.510535	0.786301
FBgn0004654	Pgd	3449.59	-0.156668	0.315561	-0.496474	0.61956	0.85125
FBgn0004655	wapl	2075.82	0.0803258	0.126607	0.63445	0.525787	0.795957
FBgn0004656	fs(1)h	6271.92	0.123963	0.14176	0.874458	0.381869	0.691816
FBgn0004657	mys	3365.95	-0.368553	0.130481	-2.82457	0.00473448	0.0485939
FBgn0004666	sim	113.617	0.538802	0.248202	2.17082	0.0299449	0.174668
FBgn0004687	Mlc-c	2811.89	-0.145306	0.112217	-1.29486	0.195368	0.511765
FBgn0004698	Xpc	2404.48	-0.0771932	0.119814	-0.644277	0.519396	0.791703
FBgn0004777	Ccp84Ag	29.991	-2.04791	0.96225	-2.12825	0.0333163	0.187163
FBgn0004779	Ccp84Ae	0.604138	-2.61028	3.24653	-0.804021	0.421385	NA
FBgn0004780	Ccp84Ad	1.16045	-0.421083	2.85637	-0.147419	0.882801	NA
FBgn0004781	Ccp84Ac	0.671742	-2.75502	3.96861	-0.694203	0.487555	NA
FBgn0004782	Ccp84Ab	17.4657	-4.52219	2.01153	-2.24813	NA	NA
FBgn0004783	Ccp84Aa	11.2517	-6.82752	3.91047	-1.74596	0.0808183	0.318666
FBgn0004784	inaC	14798.2	-0.415945	0.135384	-3.07234	0.00212385	0.0279042
FBgn0004795	retn	1806.61	-0.0824925	0.160512	-0.513932	0.607299	0.841849
FBgn0004797	mdy	2405.06	0.417309	0.14385	2.90101	0.00371968	0.0414109
FBgn0004811	fs(2)ltoPP43	538.881	0.290057	0.158775	1.82685	0.0677226	0.284616
FBgn0004828	His3.3B	16632.5	-0.300557	0.124249	-2.41899	0.0155635	0.111646
FBgn0004832	Xpac	176.598	-0.134463	0.199984	-0.67237	0.501348	0.779907
FBgn0004837	Su(H)	425.795	0.0626982	0.144595	0.433613	0.66457	0.874927
FBgn0004838	Hrb27C	13090.6	0.251055	0.0988407	2.53999	0.0110855	0.0890242
FBgn0004839	otk	180.934	-0.284706	0.202878	-1.40334	0.160515	0.463828
FBgn0004841	TkR86C	138.451	0.000754864	0.211965	0.00356126	0.997159	0.998646
FBgn0004842	RYa-R	33.5434	-0.330198	0.37742	-0.874881	0.381639	0.691607
FBgn0004852	Ac76E	2778.49	0.22264	0.127416	1.74734	0.080578	0.317835
FBgn0004854	B-H2	141.241	0.0211478	0.237605	0.0890041	0.929079	0.979223
FBgn0004855	RpII15	430.406	-0.35891	0.155184	-2.3128	0.0207338	0.136298
FBgn0004856	Bx42	1184.39	-0.133411	0.148616	-0.897688	0.369352	0.683553
FBgn0004858	elB	992.074	-0.457697	0.131606	-3.47778	0.000505585	0.00977889
FBgn0004859	ci	1185.55	0.34954	0.179005	1.95269	0.0508569	0.240829
FBgn0004860	ph-d	1426.37	-0.0749531	0.143319	-0.522979	0.600989	0.836562
FBgn0004861	ph-p	1964.28	-0.182168	0.133842	-1.36107	0.173493	0.483749
FBgn0004862	bap	17.1205	0.00508339	0.547464	0.00928534	0.992591	0.997371
FBgn0004863	C15	30.9338	-0.479946	0.368203	-1.30348	0.19241	0.508132
FBgn0004864	hop	1403.05	0.150371	0.12117	1.24099	0.21461	0.537303
FBgn0004865	Eip78C	756.38	-0.113273	0.178323	-0.635216	0.525288	0.795762
FBgn0004867	RpS2	33875.7	0.607704	0.219445	2.76928	0.0056181	0.0547619
FBgn0004868	Gdi	6931.41	0.061466	0.118121	0.520367	0.602808	0.838224
FBgn0004870	bab1	247.204	0.0271437	0.171385	0.158379	0.874158	0.958322
FBgn0004872	piwi	11.6853	0.257612	0.624528	0.412491	0.67998	0.879668
FBgn0004875	enc	6035.72	-0.0596367	0.158096	-0.377219	0.706011	0.891852
FBgn0004876	cdi	2660.21	0.0620549	0.159484	0.389097	0.697204	0.88709
FBgn0004878	cas	0.99098	0.206457	2.48616	0.0830427	0.933818	NA
FBgn0004880	scrt	2909.81	-0.0458417	0.136915	-0.334819	0.737761	0.907652
FBgn0004882	orb	611.884	0.0469328	0.213551	0.219773	0.826048	0.944506
FBgn0004885	tok	6163.67	0.12357	0.181456	0.680993	0.495876	0.775993
FBgn0004888	Scsalpha1	8221.68	0.211156	0.151864	1.39043	0.164398	0.469278
FBgn0004889	tws	3382.04	-0.0308694	0.129381	-0.238593	0.811421	0.939545
FBgn0004892	sob	45.9935	-0.236007	0.367346	-0.642466	0.520571	0.792199
FBgn0004893	bowl	636.386	-0.391965	0.147899	-2.65022	0.00804388	0.0706963
FBgn0004895	FoxL1	0.478966	-2.26692	3.5542	-0.637815	0.523594	NA
FBgn0004896	fd59A	207.181	-0.300937	0.189817	-1.5854	0.112875	0.383847
FBgn0004897	fd96Ca	7.21331	-0.930988	0.760963	-1.22343	0.221166	0.543618
FBgn0004898	fd96Cb	8.41553	0.0427945	0.858691	0.049837	0.960252	0.988303
FBgn0004901	Prat	259.168	-0.135988	0.174452	-0.779517	0.435675	0.73261
FBgn0004903	Rb97D	1293.76	-0.173417	0.115984	-1.49517	0.134869	0.423035
FBgn0004907	14-3-3zeta	39952.9	-0.0586235	0.105193	-0.557297	0.577325	0.823219
FBgn0004908	Arl2	155.622	-0.0777558	0.209582	-0.371004	0.710635	0.893971
FBgn0004910	Eip63F-1	1210.83	-0.243994	0.124267	-1.96347	0.0495916	0.236403
FBgn0004911	asRNA:Eig63F-2	7.89668	-0.37823	0.718898	-0.526125	0.598801	0.835905
FBgn0004913	Gnf1	825.883	0.00364035	0.12993	0.0280179	0.977648	0.992077
FBgn0004914	Hnf4	3050.69	0.0326074	0.113846	0.286416	0.774559	0.923643
FBgn0004915	TfIIB	690.327	-0.00593022	0.124048	-0.0478058	0.961871	0.989058
FBgn0004919	gol	8124.52	-0.0758386	0.0973767	-0.778817	0.436088	0.733035
FBgn0004921	Ggamma1	25354.7	-0.171422	0.127906	-1.34022	0.180175	0.493398
FBgn0004924	Top1	4032.85	0.172379	0.102274	1.68547	0.0918976	0.344247
FBgn0004926	eIF2beta	2619.34	0.551334	0.184527	2.98783	0.00280966	0.0342246
FBgn0004956	upd1	3.25783	-0.685909	1.07636	-0.637249	0.523962	NA
FBgn0004957	por	234.4	-0.0826074	0.169835	-0.486397	0.626686	0.8566
FBgn0004959	phm	80.5653	-1.40221	0.557056	-2.51718	0.0118297	0.0929559
FBgn0005198	gig	2321.18	-0.106324	0.119137	-0.89245	0.372152	0.684599
FBgn0005278	Sam-S	7999.79	0.679433	0.167206	4.06345	4.83531e-05	0.00146026
FBgn0005322	nmd	1141.25	0.122293	0.143544	0.85195	0.394242	0.701172
FBgn0005355	Su(fu)	566.395	0.0856173	0.140376	0.609916	0.541918	0.805811
FBgn0005386	ash1	1817.29	-0.0358456	0.138787	-0.258277	0.796193	0.933303
FBgn0005390	fs(1)M3	23.9678	-0.249691	0.534957	-0.466749	0.640679	0.863608
FBgn0005391	Yp2	675978	0.580245	0.557425	1.04094	0.297904	0.622893
FBgn0005411	U2af50	1732.39	-0.0284226	0.157008	-0.181027	0.856346	0.952898
FBgn0005427	ewg	3248.39	-0.0739885	0.12562	-0.588984	0.555872	0.811589
FBgn0005533	RpS17	19870.2	0.394863	0.220337	1.79209	0.0731182	0.298629
FBgn0005536	Mbs	6211.34	-0.309655	0.156186	-1.98261	0.0474111	0.231372
FBgn0005558	ey	1354.23	-0.0210635	0.137663	-0.153007	0.878393	0.959538
FBgn0005561	sv	952.328	-0.141541	0.14538	-0.973591	0.330259	0.652616
FBgn0005564	Shal	2317	-0.00396715	0.145116	-0.0273378	0.97819	0.992077
FBgn0005585	Calr	12887.4	0.43211	0.125037	3.45585	0.00054857	0.0103361
FBgn0005586	Rab3	6923.34	-0.307636	0.189614	-1.62243	0.104711	0.369886
FBgn0005590	scw	2.23273	0.404829	1.54771	0.261566	0.793656	NA
FBgn0005593	RpL7	35086.9	0.381488	0.228016	1.67308	0.0943116	0.349746
FBgn0005596	yem	433.614	0.0775937	0.183715	0.42236	0.672762	0.878472
FBgn0005612	Sox14	1386.35	0.0593301	0.173971	0.341035	0.733077	0.90566
FBgn0005613	Sox15	106.781	-0.0069026	0.235802	-0.0292729	0.976647	0.99203
FBgn0005614	trpl	80649.9	-0.195313	0.151777	-1.28685	0.198148	0.516118
FBgn0005616	msl-2	710.469	-0.103391	0.130147	-0.79442	0.426951	0.726584
FBgn0005617	msl-1	940.184	0.0756194	0.150445	0.502637	0.61522	0.84784
FBgn0005619	Hdc	2446.01	-0.539534	0.238311	-2.26399	0.0235746	0.147786
FBgn0005624	Psc	359.548	-0.255091	0.195185	-1.30692	0.191241	0.506732
FBgn0005626	ple	1933.89	-0.589431	0.341564	-1.72568	0.0844041	0.327032
FBgn0005631	robo1	2283.62	0.0343804	0.184021	0.186828	0.851795	0.952545
FBgn0005632	faf	10043.7	0.135486	0.153402	0.883207	0.377125	0.687546
FBgn0005633	fln	8.70587	0.55951	0.784015	0.713648	0.475445	0.76249
FBgn0005636	nvy	540.05	-0.207097	0.171077	-1.21055	0.226069	0.549781
FBgn0005638	slbo	27.1171	-0.55576	0.471299	-1.17921	0.238316	0.562056
FBgn0005640	Eip63E	2323.58	-0.209742	0.0993195	-2.1118	0.034704	0.192278
FBgn0005642	wdn	950.804	0.150618	0.208827	0.721257	0.470751	0.759478
FBgn0005648	Pabp2	887.313	0.192232	0.147475	1.3035	0.192406	0.508132
FBgn0005649	Rox8	4067.27	-0.125559	0.109613	-1.14547	0.252013	0.5766
FBgn0005655	PCNA	62.6221	0.137826	0.619115	0.222617	0.823834	0.943725
FBgn0005658	Ets65A	623.692	0.0221673	0.14017	0.158146	0.874342	0.958322
FBgn0005659	Ets98B	1424.14	0.260581	0.118343	2.20192	0.0276712	0.165456
FBgn0005660	Ets21C	81.427	-0.896721	0.539194	-1.66308	0.0962969	0.353056
FBgn0005664	Crys	1133.87	-6.43168	1.69258	-3.79993	NA	NA
FBgn0005666	bt	14765.9	-0.561865	0.629991	-0.891862	0.372467	0.684599
FBgn0005670	Cyp4d1	653.285	0.726371	0.415596	1.74778	0.080502	0.317652
FBgn0005671	Vha55	15254.5	-0.142972	0.147878	-0.966821	0.333633	0.654298
FBgn0005672	spi	2976.72	0.142611	0.152146	0.937328	0.34859	0.667006
FBgn0005674	GluProRS	2538.22	0.255424	0.196384	1.30064	0.193383	0.509151
FBgn0005677	dac	867.029	0.211104	0.118662	1.77904	0.0752339	0.304026
FBgn0005683	pie	50.6986	-0.0314097	0.297181	-0.105692	0.915827	0.974957
FBgn0005694	Aef1	1523.26	0.15145	0.111055	1.36373	0.172652	0.482158
FBgn0005695	gcl	654.352	0.0811011	0.1275	0.636087	0.52472	0.795631
FBgn0005696	DNApol-alpha73	55.5377	0.364055	0.382078	0.952828	0.340677	0.659357
FBgn0005771	noc	1651.27	0.0434386	0.147135	0.295229	0.767819	0.920267
FBgn0005775	Con	2823.77	-0.179051	0.175547	-1.01996	0.307747	0.63303
FBgn0005777	PpD3	1090.17	0.215386	0.115884	1.85864	0.063078	0.272973
FBgn0005778	PpD5	12.7643	0.0358892	0.684038	0.0524667	0.958157	0.987351
FBgn0005779	PpD6	0.377487	2.13217	3.86945	0.551028	0.581615	NA
FBgn0008635	betaCOP	3682.58	0.345979	0.119377	2.8982	0.00375308	0.041524
FBgn0008636	hbn	192.731	-0.365655	0.199784	-1.83025	0.0672118	0.283135
FBgn0008646	E5	80.2379	-0.614163	0.29608	-2.07432	0.03805	0.203967
FBgn0008651	lbl	289.346	-0.267603	0.273153	-0.979682	0.327243	0.64994
FBgn0010014	CanB	1972.75	-0.191587	0.128246	-1.4939	0.135203	0.423338
FBgn0010015	CanA1	314.863	-0.424056	0.185174	-2.29004	0.0220192	0.141066
FBgn0010019	Cyp4g1	1744.97	-2.75959	2.49716	-1.10509	0.269119	0.595274
FBgn0010038	GstD2	73.7424	0.651369	0.276954	2.3519	0.0186777	0.126978
FBgn0010039	GstD3	211.923	-0.0284544	0.194897	-0.145997	0.883924	0.960949
FBgn0010040	GstD4	3.75347	0.377147	1.10054	0.342692	0.73183	NA
FBgn0010041	GstD5	9.53866	0.579855	0.760793	0.762171	0.445958	0.740089
FBgn0010042	GstD6	2.09979	0.567693	1.52526	0.372195	0.709747	NA
FBgn0010043	GstD7	0.54039	2.65808	2.84734	0.933532	0.350545	NA
FBgn0010044	GstD8	13.9026	0.00182439	0.66396	0.00274774	0.997808	0.998646
FBgn0010051	Itp-r83A	6102.98	0.136102	0.14447	0.942081	0.346151	0.664473
FBgn0010052	Jhe	116.243	0.671653	0.296399	2.26604	0.0234488	0.147272
FBgn0010053	Jheh1	2613.11	-0.120313	0.189793	-0.633919	0.526134	0.796257
FBgn0010078	RpL23	25349.9	0.12849	0.232433	0.552806	0.580396	0.825365
FBgn0010097	gammaTub37C	0.335871	-1.74873	4.02989	-0.43394	0.664332	NA
FBgn0010100	mAcon1	27152.2	-0.36088	0.227409	-1.58692	0.11253	0.382995
FBgn0010105	comm	596.734	0.0272611	0.144972	0.188045	0.850842	0.95245
FBgn0010109	dpn	1.83472	0.964743	1.59386	0.605288	0.544988	NA
FBgn0010113	hdc	1466.62	-0.0474531	0.148425	-0.319712	0.749187	0.911488
FBgn0010114	hig	14827.4	0.0781341	0.144933	0.539104	0.589815	0.830824
FBgn0010173	RpA-70	1107.43	-0.0440436	0.111827	-0.393856	0.693687	0.885635
FBgn0010194	Wnt5	586.385	-0.0454661	0.194333	-0.23396	0.815016	0.940817
FBgn0010197	Gyc32E	83.6742	-0.222177	0.263866	-0.842007	0.399784	0.70595
FBgn0010198	RpS15Aa	24210.2	0.565661	0.223433	2.53168	0.0113518	0.0902172
FBgn0010213	Sod2	2961.74	-0.469836	0.250608	-1.87478	0.0608225	0.267135
FBgn0010215	alpha-Cat	2851.03	0.388297	0.143036	2.71468	0.00663401	0.0616319
FBgn0010217	ATPsynbeta	48537.3	-0.38843	0.287231	-1.35232	0.176272	0.487693
FBgn0010220	Dbp45A	541.053	0.294605	0.200451	1.46971	0.141641	0.434239
FBgn0010222	Nmdmc	1376.38	0.0160317	0.337398	0.0475156	0.962102	0.989058
FBgn0010223	Galphaf	23.9021	0.414874	0.495816	0.83675	0.402733	0.707704
FBgn0010225	Gel	22469.5	0.503974	0.19458	2.59006	0.00959601	0.0799887
FBgn0010226	GstS1	3187.57	0.340856	0.184071	1.85176	0.0640602	0.27593
FBgn0010228	HmgZ	3850.3	-0.372385	0.206733	-1.80129	0.0716579	0.295365
FBgn0010235	Klc	3169.57	-0.0417033	0.107834	-0.386738	0.69895	0.887252
FBgn0010238	Lac	2810.78	-0.0640706	0.117101	-0.547138	0.584284	0.827901
FBgn0010240	Lcch3	766.527	-0.212639	0.125208	-1.69829	0.0894539	0.338173
FBgn0010241	Mdr50	14.7241	1.21156	0.639884	1.89341	0.0583034	0.260446
FBgn0010246	Myo61F	1134.43	0.151395	0.193621	0.781913	0.434265	0.731348
FBgn0010247	Parp	495.341	0.260066	0.205741	1.26405	0.206212	0.52774
FBgn0010258	Rbp4	10.5932	0.88883	0.619256	1.43532	0.151196	0.448639
FBgn0010263	Rbp9	19288.6	-0.224233	0.111066	-2.01891	0.0434968	0.219656
FBgn0010265	RpS13	25843.3	0.244223	0.203741	1.19869	0.230648	0.553938
FBgn0010269	Dsor1	983.566	-0.198301	0.133083	-1.49006	0.136208	0.425384
FBgn0010278	Ssrp	686.214	0.114569	0.14938	0.766964	0.443103	0.739048
FBgn0010280	Taf4	4029.8	0.103142	0.131336	0.785329	0.432261	0.730802
FBgn0010282	TfIIFalpha	805.906	-0.0411307	0.124617	-0.330058	0.741356	0.909262
FBgn0010287	Trf	105.461	0.452778	0.381389	1.18718	0.235155	0.558381
FBgn0010288	Uch	737.36	-0.154794	0.14838	-1.04322	0.296845	0.622184
FBgn0010292	bys	550.357	0.955215	0.150804	6.33414	2.38663e-10	4.19747e-08
FBgn0010295	ng3	0.693342	0.0107312	2.77382	0.00386876	0.996913	NA
FBgn0010296	ng4	0.884233	-1.85471	3.08485	-0.601232	0.547685	NA
FBgn0010300	brat	1480.54	-0.0859444	0.16623	-0.51702	0.605142	0.840053
FBgn0010303	hep	2341.38	-0.0641265	0.118458	-0.541346	0.588269	0.829737
FBgn0010309	pigeon	568.989	-0.0553311	0.211612	-0.261475	0.793726	0.93245
FBgn0010313	corto	3264.84	0.233255	0.109452	2.13111	0.0330799	0.186265
FBgn0010314	Cks30A	70.6214	-0.964644	0.648905	-1.48657	0.137128	0.426873
FBgn0010315	CycD	366.208	0.559562	0.162399	3.4456	0.000569786	0.0106982
FBgn0010316	dap	322.597	0.353682	0.213422	1.6572	0.0974798	0.355095
FBgn0010317	CycJ	21.2426	-0.0339009	0.570962	-0.059375	0.952653	0.985952
FBgn0010323	Gsc	30.8278	-0.162172	0.406234	-0.399208	0.68974	0.88377
FBgn0010328	woc	2091	0.0710954	0.129838	0.547569	0.583988	0.827678
FBgn0010329	Tbh	955.323	-0.0780934	0.145933	-0.535131	0.592559	0.832284
FBgn0010333	Rac1	1428.43	-0.158616	0.115064	-1.3785	0.168049	0.475999
FBgn0010339	128up	723.776	0.481056	0.180472	2.66555	0.00768629	0.0686134
FBgn0010340	140up	276.204	-0.117718	0.154531	-0.761774	0.446195	0.740089
FBgn0010341	Cdc42	2817.73	-0.168696	0.13484	-1.25108	0.210904	0.533154
FBgn0010342	Map60	401.487	-0.378008	0.149142	-2.53455	0.0112592	0.0897468
FBgn0010348	Arf79F	7149.78	0.142527	0.113382	1.25705	0.208735	0.531201
FBgn0010350	Cds	12237	-0.333679	0.185943	-1.79453	0.0727293	0.297786
FBgn0010352	Nc73EF	19284.5	-0.210866	0.191215	-1.10277	0.270126	0.595558
FBgn0010355	Taf1	3246.57	0.0347252	0.125606	0.276462	0.782194	0.927028
FBgn0010356	Taf5	476.976	0.119581	0.151274	0.790494	0.429239	0.72877
FBgn0010357	betaTry	8.39025	-1.90543	3.1117	-0.612341	0.540312	0.805211
FBgn0010358	deltaTry	3.13885	-1.4175	1.61276	-0.878928	0.37944	NA
FBgn0010359	gammaTry	3.13885	-1.4175	1.61276	-0.878928	0.37944	NA
FBgn0010379	Akt1	2438.86	0.025107	0.145811	0.172188	0.86329	0.954847
FBgn0010380	AP-1-2beta	3718.73	-0.0588868	0.129196	-0.455794	0.648538	0.868254
FBgn0010382	CycE	58.549	-0.128872	0.320587	-0.401988	0.687693	0.882859
FBgn0010383	Cyp18a1	1109.98	0.302675	0.17643	1.71555	0.086245	0.331053
FBgn0010385	Def	177.204	-1.55664	0.510291	-3.05049	0.00228467	0.0291944
FBgn0010387	Acbp2	2254.96	-0.0629887	0.351866	-0.179013	0.857927	0.953646
FBgn0010388	Dro	5576.11	5.13504	1.57881	3.25247	0.00114405	0.0179845
FBgn0010389	htl	797.64	0.180583	0.135814	1.32963	0.183639	0.498178
FBgn0010391	Gtp-bp	2118.25	0.152064	0.199777	0.761168	0.446557	0.740124
FBgn0010395	Itgbn	67.1386	-2.11835	0.610808	-3.46812	0.000524121	0.00994531
FBgn0010397	LamC	1582.89	-0.52595	0.155978	-3.37196	0.00074636	0.0131824
FBgn0010398	Lrr47	113.126	-0.171783	0.219621	-0.78218	0.434109	0.731287
FBgn0010399	Nmdar1	1462.15	-0.146717	0.184412	-0.795592	0.426269	0.726486
FBgn0010401	Os-C	2.86921	-1.07756	1.59067	-0.677429	0.498134	NA
FBgn0010403	Obp83b	9.32506	-0.51927	0.716342	-0.724891	0.468519	0.758302
FBgn0010406	RNaseX25	1705.66	-0.159569	0.107191	-1.48865	0.13658	0.42591
FBgn0010407	Ror	236.626	-0.0473753	0.20486	-0.231257	0.817115	0.941209
FBgn0010408	RpS9	5378.51	1.00127	0.215219	4.65231	3.28233e-06	0.000152337
FBgn0010409	RpL18A	27915.6	0.411978	0.230498	1.78734	0.0738825	0.300183
FBgn0010411	RpS18	25162.9	0.558151	0.218773	2.55127	0.010733	0.0870414
FBgn0010412	RpS19a	19772.2	0.290039	0.248006	1.16949	0.242208	0.565741
FBgn0010414	SerT	582.309	-0.172269	0.249011	-0.691811	0.489056	0.770941
FBgn0010415	Sdc	6661.7	-0.24038	0.125967	-1.90827	0.0563559	0.255328
FBgn0010416	TH1	793.193	0.0731951	0.142495	0.513667	0.607485	0.841952
FBgn0010417	Taf6	784.685	-0.141141	0.13854	-1.01877	0.308312	0.633529
FBgn0010421	TfIIFbeta	355.584	-0.388285	0.160239	-2.42316	0.0153861	0.111155
FBgn0010422	TfIIS	797.109	-0.0824882	0.152073	-0.542426	0.587525	0.829397
FBgn0010423	TpnC47D	7.44346	-2.30272	1.12318	-2.05019	0.0403462	0.211104
FBgn0010424	TpnC73F	200.816	-0.678163	0.206334	-3.28672	0.00101363	0.0163908
FBgn0010425	epsilonTry	0.906208	-3.19512	2.84277	-1.12395	0.261036	NA
FBgn0010431	mtrm	2.53847	0.794874	1.23071	0.645866	0.518366	NA
FBgn0010433	ato	5.90764	-0.719141	0.987063	-0.728566	0.466267	0.756898
FBgn0010434	cora	12013.6	-0.0598428	0.141053	-0.424259	0.671377	0.878203
FBgn0010435	emp	10702.3	0.00763379	0.246527	0.0309653	0.975297	0.991605
FBgn0010438	mtSSB	14.5168	1.47542	0.690919	2.13544	0.0327247	0.185188
FBgn0010441	pll	453.924	-0.110438	0.179123	-0.616546	0.537534	0.804075
FBgn0010452	trn	630.143	-0.293339	0.144099	-2.03567	0.0417831	0.214552
FBgn0010453	Wnt4	220.938	-0.18324	0.181142	-1.01159	0.311736	0.635868
FBgn0010470	Fkbp14	2633.19	0.326976	0.176839	1.849	0.0644575	0.27642
FBgn0010473	tutl	9736.67	-0.136979	0.217052	-0.631092	0.527981	0.798038
FBgn0010482	l(2)01289	2373.96	-0.419179	0.336995	-1.24387	0.213546	0.536794
FBgn0010488	NAT1	13785.6	-0.134318	0.107492	-1.24957	0.211458	0.53405
FBgn0010497	dmGlut	333.178	0.805419	0.263751	3.05372	0.00226027	0.0290508
FBgn0010501	Dcp-1	231.108	0.022313	0.173719	0.128443	0.897798	0.967504
FBgn0010504	kermit	146.689	-0.688304	0.198113	-3.4743	0.000512179	0.00982303
FBgn0010516	wal	6008.62	0.29171	0.158231	1.84357	0.0652463	0.277704
FBgn0010520	Bka	229.181	0.375252	0.22104	1.69766	0.0895712	0.338489
FBgn0010531	Ccs	390.521	-0.201445	0.180018	-1.11903	0.263129	0.589063
FBgn0010548	Aldh-III	8076.88	0.0614721	0.0994149	0.618339	0.536352	0.803952
FBgn0010549	l(2)03659	6.08381	-0.924611	0.904171	-1.02261	0.306494	0.632414
FBgn0010551	Phb2	3233.31	0.372311	0.154902	2.40353	0.0162374	0.114905
FBgn0010583	dock	2323.4	-0.0887377	0.12199	-0.727416	0.466971	0.756939
FBgn0010590	Prosbeta1	1182.6	-0.128917	0.191722	-0.672418	0.501318	0.779907
FBgn0010591	Sply	2708.36	0.337752	0.15667	2.15582	0.0310977	0.178472
FBgn0010602	lwr	1474.43	-0.105607	0.11837	-0.892181	0.372296	0.684599
FBgn0010607	l(2)05714	276.08	0.0325162	0.205832	0.157975	0.874477	0.958322
FBgn0010611	Hmgs	2231.46	0.372608	0.16044	2.32241	0.0202111	0.134471
FBgn0010612	ATPsynG	5204.29	-0.272247	0.245833	-1.10745	0.268101	0.594018
FBgn0010620	CG10939	1620.76	-0.365559	0.115291	-3.17075	0.00152048	0.0221483
FBgn0010621	CCT5	2233.52	0.127284	0.283687	0.448677	0.653664	0.869033
FBgn0010622	DCTN3-p24	514.256	-0.320745	0.145593	-2.20302	0.0275934	0.165083
FBgn0010638	Sec61beta	2153.06	0.724426	0.143458	5.04973	4.42442e-07	2.80676e-05
FBgn0010651	MFS14	2513.46	0.768815	0.302949	2.53777	0.0111561	0.0893822
FBgn0010660	Nup214	1201.34	0.0246211	0.12015	0.20492	0.837634	0.948369
FBgn0010741	Pfdn2	790.313	0.0991027	0.139675	0.709525	0.477999	0.764871
FBgn0010747	Srp54k	2008.2	0.349641	0.112392	3.11091	0.00186509	0.0256355
FBgn0010750	atms	741.413	-0.177968	0.136472	-1.30406	0.192214	0.50807
FBgn0010762	simj	1787.98	-0.0322075	0.123427	-0.260945	0.794135	0.932657
FBgn0010768	sqz	307.788	-0.0254203	0.172567	-0.147307	0.88289	0.960782
FBgn0010770	ppan	289.281	0.630115	0.19131	3.29368	0.000988851	0.0161362
FBgn0010772	Xe7	6088.51	-0.0972569	0.163716	-0.594059	0.552473	0.810712
FBgn0010774	Ref1	2511.56	0.121	0.111043	1.08967	0.27586	0.602833
FBgn0010786	l(3)02640	1552.85	-0.256451	0.13176	-1.94634	0.0516133	0.242909
FBgn0010803	TrpRS	665.847	0.220178	0.122422	1.79852	0.072094	0.296394
FBgn0010808	Chchd3	2177.03	-0.525238	0.20199	-2.60031	0.0093139	0.0781945
FBgn0010812	unc-45	824.715	-0.136022	0.157679	-0.862649	0.388331	0.696319
FBgn0010825	Gug	4646.52	0.109837	0.191484	0.573609	0.566233	0.816816
FBgn0010830	l(3)04053	555.145	-0.235462	0.160031	-1.47135	0.141195	0.433617
FBgn0010877	l(3)05822	1626.09	0.00112607	0.121844	0.00924191	0.992626	0.997371
FBgn0010894	sinu	703.148	0.211422	0.165473	1.27768	0.201362	0.52082
FBgn0010905	Spn	4954.44	-0.167482	0.160026	-1.04659	0.295289	0.620748
FBgn0010909	msn	6165.84	-0.126318	0.126414	-0.999234	0.317682	0.642616
FBgn0010926	l(3)07882	508.083	0.570236	0.210948	2.7032	0.0068675	0.063253
FBgn0011016	SsRbeta	2395.21	0.67048	0.146548	4.57517	4.75827e-06	0.000209071
FBgn0011020	Sas-4	126.608	0.155903	0.260326	0.598879	0.549254	0.809061
FBgn0011202	dia	1295.42	-0.165166	0.117197	-1.40931	0.158744	0.460752
FBgn0011204	cue	2113.62	0.331785	0.183423	1.80885	0.0704738	0.292056
FBgn0011205	fbl	892.381	0.503202	0.166463	3.0229	0.00250364	0.0313951
FBgn0011206	bol	4076.32	-0.0954406	0.188768	-0.505597	0.613139	0.846677
FBgn0011207	pelo	920.481	0.377971	0.118111	3.20014	0.00137363	0.0206546
FBgn0011211	blw	40916.2	-0.410537	0.298787	-1.37401	0.169438	0.478653
FBgn0011217	eff	5951.48	0.0459425	0.126784	0.362369	0.717077	0.89787
FBgn0011224	heph	4075.8	0.0157292	0.144785	0.108638	0.913489	0.973962
FBgn0011225	jar	11030	0.0485175	0.14658	0.330996	0.740648	0.909159
FBgn0011227	ox	1869.45	-0.54244	0.225889	-2.40135	0.0163347	0.115441
FBgn0011230	poe	13038.7	0.211509	0.153603	1.37698	0.168517	0.476695
FBgn0011232	scat	902.722	-0.116201	0.128561	-0.903858	0.366071	0.680653
FBgn0011236	ken	680.978	-0.171466	0.12677	-1.35257	0.176192	0.487597
FBgn0011259	Sema1a	2395.94	0.00780868	0.161456	0.0483642	0.961426	0.989058
FBgn0011260	Sema2a	1602.28	-0.0270677	0.146727	-0.184476	0.85364	0.952545
FBgn0011270	Pglym87	0.50266	1.16318	3.0073	0.386787	0.698914	NA
FBgn0011272	RpL13	31487.7	0.27467	0.220569	1.24528	0.213031	0.536127
FBgn0011274	Dif	3741.36	0.0819436	0.0987513	0.829798	0.406653	0.711909
FBgn0011276	HLH3B	26.8501	-0.127489	0.505641	-0.252134	0.800937	0.935237
FBgn0011277	HLH4C	11.9441	-0.713882	0.612754	-1.16504	0.244003	0.567331
FBgn0011278	lbe	3.76054	-0.910624	1.36564	-0.66681	0.504893	NA
FBgn0011279	Obp69a	15.8866	0.782171	0.681266	1.14811	0.250921	0.575939
FBgn0011280	Obp19d	17767.4	-0.524354	0.170837	-3.06932	0.00214546	0.0280164
FBgn0011281	Obp83a	10.5776	-0.567728	0.652401	-0.870214	0.384184	0.693861
FBgn0011282	Obp84a	1.88788	-2.19989	2.08416	-1.05553	0.291185	NA
FBgn0011283	Obp28a	232.012	0.959711	1.12137	0.855841	0.392086	0.69931
FBgn0011284	RpS4	43051.4	0.182019	0.249709	0.728925	0.466048	0.756898
FBgn0011286	RyR	8545.7	-0.0647117	0.273994	-0.236179	0.813294	0.940089
FBgn0011288	Snap25	4583.75	-0.0758273	0.176868	-0.428722	0.668125	0.876968
FBgn0011289	TfIIA-L	1557.56	-0.141182	0.157101	-0.89867	0.368828	0.683292
FBgn0011290	Taf12	909.601	-0.133019	0.127776	-1.04103	0.29786	0.622893
FBgn0011291	Taf11	189.343	-0.0729915	0.194117	-0.376017	0.706904	0.892039
FBgn0011293	a10	5.94843	-4.89366	1.82581	-2.68027	0.00735622	0.0662183
FBgn0011294	a5	0.353794	-1.81457	4.02449	-0.450882	0.652075	NA
FBgn0011296	l(2)efl	1701.99	-0.913243	0.238268	-3.83283	0.000126675	0.00315834
FBgn0011297	Alg3	357.234	-0.0680457	0.284315	-0.239332	0.810848	0.93953
FBgn0011300	babo	3216.76	-0.0593793	0.102797	-0.577638	0.563508	0.815444
FBgn0011305	Rsf1	1555.29	-0.290708	0.116663	-2.49186	0.0127076	0.0973824
FBgn0011327	Uch-L5	455.892	0.0187858	0.172493	0.108908	0.913276	0.973962
FBgn0011335	vers	513.959	-0.236621	0.156117	-1.51566	0.129605	0.414279
FBgn0011336	Stt3B	3036.33	0.468892	0.157932	2.96896	0.00298814	0.0358343
FBgn0011361	ND-ACP	3045.79	-0.339366	0.283584	-1.1967	0.231422	0.554493
FBgn0011455	ND-SGDH	3700.61	-0.328443	0.166849	-1.9685	0.0490107	0.235251
FBgn0011474	PR-Set7	673.547	-0.157301	0.154516	-1.01803	0.308666	0.633538
FBgn0011476	l(3)neo43	232.013	-0.266325	0.196749	-1.35363	0.175856	0.487052
FBgn0011481	Ssdp	2333.51	0.0725458	0.106025	0.684234	0.493827	0.77454
FBgn0011509	SrpRbeta	717.61	0.400084	0.155503	2.57284	0.0100867	0.0832451
FBgn0011554	etaTry	0.781035	-2.97599	2.99582	-0.993379	0.320525	NA
FBgn0011556	zetaTry	0.707587	-2.82498	3.93335	-0.718212	0.472626	NA
FBgn0011559	Acp36DE	1.07343	-0.763976	2.9354	-0.260263	0.794661	NA
FBgn0011566	Smyd3	391.73	-0.302734	0.137701	-2.19848	0.0279147	0.166171
FBgn0011569	can	9.45054	1.31637	0.685414	1.92055	0.0547887	0.250379
FBgn0011570	cpb	989.676	-0.207334	0.133449	-1.55366	0.120265	0.397705
FBgn0011573	Cdc37	877.095	0.0125564	0.218545	0.0574544	0.954183	0.986555
FBgn0011581	Ms	3833.34	-0.367786	0.220182	-1.67037	0.0948452	0.350633
FBgn0011582	Dop1R1	1373.82	0.314042	0.215855	1.45487	0.145704	0.440772
FBgn0011584	Trp1	5254.39	0.0682405	0.120566	0.566001	0.571393	0.819854
FBgn0011586	e(r)	1310.2	-0.138124	0.120484	-1.14641	0.251624	0.576546
FBgn0011589	Elk	1292.66	0.0319335	0.165706	0.192712	0.847185	0.951563
FBgn0011591	fng	1109.39	-0.247214	0.115734	-2.13605	0.0326755	0.185057
FBgn0011592	fra	969.112	0.0801307	0.19531	0.410274	0.681605	0.880102
FBgn0011596	fzo	8.76942	0.140877	0.753936	0.186856	0.851774	0.952545
FBgn0011603	ine	2332.73	-0.022618	0.13499	-0.167553	0.866935	0.955764
FBgn0011604	Iswi	1330.8	0.0441175	0.158749	0.277908	0.781083	0.926758
FBgn0011606	Klp3A	78.0248	0.0322073	0.293205	0.109846	0.912532	0.973652
FBgn0011638	La	1557.72	0.539521	0.152656	3.53424	0.000408954	0.00830377
FBgn0011640	lark	2393.44	0.0625594	0.161012	0.388539	0.697617	0.887231
FBgn0011642	Zyx	2764.33	0.299778	0.143905	2.08316	0.0372366	0.201216
FBgn0011648	Mad	1242.11	-0.146769	0.10651	-1.37799	0.168207	0.476272
FBgn0011653	mas	0.885222	0.712573	2.05573	0.346627	0.728871	NA
FBgn0011655	Med	1163.25	-0.0974752	0.126395	-0.771197	0.44059	0.737324
FBgn0011656	Mef2	3215.75	-0.0482732	0.103122	-0.468117	0.639701	0.863039
FBgn0011659	Mlh1	84.6832	-0.467019	0.248845	-1.87674	0.0605532	0.266499
FBgn0011660	Pms2	189.12	0.203613	0.199109	1.02262	0.306486	0.632414
FBgn0011661	Moe	11818.2	-0.128112	0.119517	-1.07192	0.283757	0.609987
FBgn0011666	msi	2900.75	-0.192734	0.157557	-1.22326	0.22123	0.543618
FBgn0011672	Mvl	2325.42	0.142121	0.124404	1.14241	0.253283	0.578198
FBgn0011674	insc	317.934	0.224354	0.176754	1.2693	0.204333	0.525714
FBgn0011676	Nos	1305.63	-0.247431	0.137578	-1.79848	0.0721011	0.296394
FBgn0011692	pav	3.41041	0.216405	1.1122	0.194573	0.845727	NA
FBgn0011693	Pdh	6336.22	-0.0417818	0.198754	-0.210219	0.833497	0.946802
FBgn0011695	EbpIII	41521.5	-0.609284	0.181717	-3.35292	0.000799644	0.0138946
FBgn0011701	repo	1478.84	0.201413	0.117061	1.72058	0.0853268	0.329298
FBgn0011703	RnrL	151.731	0.289873	0.274685	1.05529	0.291292	0.617916
FBgn0011704	RnrS	199.08	0.0543982	0.310003	0.175476	0.860706	0.954154
FBgn0011705	rost	2663.02	1.07774	0.184295	5.84793	4.97739e-09	5.80028e-07
FBgn0011706	rpr	40.8818	-0.145328	0.357096	-0.406972	0.684029	0.881049
FBgn0011708	Syx5	1850.58	0.149849	0.112803	1.32841	0.184044	0.498644
FBgn0011710	43709	767.191	-0.266346	0.13961	-1.90778	0.0564194	0.255328
FBgn0011715	Snr1	624.568	-0.238449	0.14898	-1.60054	0.109479	0.378619
FBgn0011722	Tig	7094.49	0.427686	0.232832	1.83689	0.0662264	0.28086
FBgn0011723	byn	33.7838	0.371395	0.380689	0.975588	0.329269	0.651789
FBgn0011725	twin	1452.34	0.0676962	0.117326	0.576991	0.563946	0.815444
FBgn0011726	tsr	3538.67	0.0450843	0.151864	0.296873	0.766564	0.919664
FBgn0011737	Wee1	927.955	0.102211	0.134101	0.762194	0.445944	0.740089
FBgn0011739	wts	2742.71	-0.0412084	0.118612	-0.347421	0.728275	0.903372
FBgn0011740	alpha-Man-IIa	1129.7	0.208594	0.127757	1.63274	0.102523	0.365208
FBgn0011741	Arp6	488.451	-0.162055	0.213494	-0.759062	0.447816	0.741129
FBgn0011742	Arp2	1713.05	0.166081	0.12653	1.31259	0.189323	0.504889
FBgn0011743	Arp53D	0.581183	-1.14397	2.83916	-0.402926	0.687003	NA
FBgn0011745	Arp1	1605.35	-0.184964	0.122006	-1.51603	0.129512	0.414105
FBgn0011746	ana	464.575	-0.110185	0.202267	-0.544751	0.585925	0.82842
FBgn0011747	Ank	9532.28	0.367233	0.119155	3.08198	0.00205629	0.0272231
FBgn0011754	PhKgamma	4701.52	-0.179579	0.12759	-1.40747	0.159289	0.461925
FBgn0011758	B-H1	156.211	-0.337311	0.209488	-1.61017	0.107361	0.375169
FBgn0011760	ctp	11329.8	-0.283087	0.162511	-1.74196	0.0815161	0.320475
FBgn0011761	dhd	1.32735	-2.55961	2.021	-1.26651	0.205332	NA
FBgn0011762	DNApol-alpha50	84.0379	0.0835416	0.259701	0.321684	0.747692	0.911427
FBgn0011763	Dp	2081.5	-0.039584	0.126351	-0.313287	0.754063	0.914723
FBgn0011766	E2f1	2411.98	0.057315	0.113908	0.503168	0.614846	0.847598
FBgn0011768	Fdh	3195.4	0.351423	0.183253	1.9177	0.0551496	0.251599
FBgn0011769	Fdx1	173.155	0.0742567	0.222008	0.334477	0.73802	0.907791
FBgn0011770	Gip	1697.7	0.511722	0.263219	1.94409	0.051884	0.243328
FBgn0011771	Hem	1250.64	0.165386	0.114468	1.44483	0.148505	0.443983
FBgn0011774	Irbp	274.805	0.119379	0.230731	0.517393	0.604882	0.8398
FBgn0011785	BRWD3	2313.11	0.00575971	0.135369	0.042548	0.966062	0.98968
FBgn0011787	mRpL12	532.05	0.195457	0.150131	1.30191	0.192946	0.508749
FBgn0011802	Gem3	228.352	0.422878	0.175666	2.40728	0.0160718	0.114337
FBgn0011812	Lcp1Psi	2.74704	0.549368	1.20156	0.457213	0.647518	NA
FBgn0011817	nmo	1583.53	-0.0408026	0.152463	-0.267624	0.788989	0.930044
FBgn0011818	oaf	865.645	-0.0363397	0.119651	-0.303714	0.761346	0.918336
FBgn0011824	CG4038	387.947	1.1859	0.171398	6.91896	4.54961e-12	1.23888e-09
FBgn0011826	Pp2B-14D	3026.22	0.12649	0.109206	1.15827	0.246755	0.570143
FBgn0011828	Pxn	4637.16	0.0629606	0.118873	0.529648	0.596356	0.834476
FBgn0011829	Ret	168.377	-0.139796	0.24948	-0.56035	0.57524	0.821818
FBgn0011834	Ser6	0.755477	0.187227	3.20684	0.0583837	0.953443	NA
FBgn0011836	Taf2	549.352	0.118162	0.143507	0.823387	0.410288	0.716051
FBgn0011837	Tis11	2237.27	0.254192	0.181926	1.39723	0.162344	0.46637
FBgn0011845	tRNA:Asp-GTC-1-11	0.564586	2.71351	3.36541	0.806295	0.420073	NA
FBgn0011859	tRNA:Gly-GCC-1-1	5.52889	-0.385417	0.945881	-0.407469	0.683664	0.880957
FBgn0011878	tRNA:His-GTG-1-4	0.679096	2.99963	3.11322	0.963511	0.335291	NA
FBgn0011882	tRNA:Ile-AAT-1-4	0.335871	-1.74873	4.02989	-0.43394	0.664332	NA
FBgn0011884	tRNA:Ile-AAT-1-6	0.330838	0.212048	4.07815	0.0519962	0.958532	NA
FBgn0011885	tRNA:Ile-AAT-1-7	0.330838	0.212048	4.07815	0.0519962	0.958532	NA
FBgn0011888	tRNA:Lys-CTT-1-3	0.42699	-0.434915	3.74875	-0.116016	0.90764	NA
FBgn0011889	tRNA:Lys-CTT-1-2	0.693342	0.0107312	2.77382	0.00386876	0.996913	NA
FBgn0011890	tRNA:Lys-CTT-1-5	1.05658	3.63163	2.27919	1.59338	0.111074	NA
FBgn0011891	tRNA:Lys-CTT-1-1	0.665353	2.97326	3.17797	0.935584	0.349487	NA
FBgn0011892	tRNA:Lys-CTT-1-6	5.0126	-0.46352	1.08636	-0.426674	0.669617	NA
FBgn0011893	tRNA:Lys-CTT-1-7	1.57705	-2.83452	1.91095	-1.4833	0.137994	NA
FBgn0011894	tRNA:Lys-CTT-1-8	2.28517	-0.679238	1.30701	-0.519688	0.603281	NA
FBgn0011895	tRNA:Lys-CTT-1-9	2.1827	-0.531285	1.37755	-0.385673	0.699739	NA
FBgn0011916	tRNA:Met-CAT-1-2	1.33901	-0.730573	1.92817	-0.378894	0.704766	NA
FBgn0011919	tRNA:Met-CAT-1-5	7.36863	-0.447908	0.825384	-0.542666	0.58736	0.829353
FBgn0011937	tRNA:Asn-GTT-1-2	0.330838	0.212048	4.07815	0.0519962	0.958532	NA
FBgn0011955	tRNA:Arg-ACG-1-5	0.795768	-0.215673	2.30041	-0.0937542	0.925304	NA
FBgn0011966	tRNA:Arg-TCG-2-3	1.41861	0.610688	1.71858	0.355345	0.722331	NA
FBgn0011981	tRNA:Ser-AGA-3-2	0.335871	-1.74873	4.02989	-0.43394	0.664332	NA
FBgn0011982	tRNA:Ser-AGA-2-1	0.516194	2.60195	3.44951	0.754296	0.450672	NA
FBgn0011985	tRNA:Ser-AGA-2-3	1.03842	-2.15758	2.50865	-0.860057	0.389758	NA
FBgn0011987	tRNA:SeC-TCA-1-1	0.857098	-0.491153	3.08837	-0.159033	0.873643	NA
FBgn0012009	tRNA:Val-AAC-2-4	1.39675	-1.53061	2.27656	-0.672338	0.501369	NA
FBgn0012010	tRNA:Val-AAC-2-3	1.31147	-2.54568	2.31903	-1.09774	0.272319	NA
FBgn0012011	tRNA:Val-AAC-1-1	0.335871	-1.74873	4.02989	-0.43394	0.664332	NA
FBgn0012034	AcCoAS	32880.7	0.489849	0.201897	2.42623	0.0152565	0.110825
FBgn0012036	Aldh	33821.6	0.523233	0.179229	2.91935	0.00350764	0.0396263
FBgn0012037	Ance	1401.91	-0.036363	0.110738	-0.32837	0.742632	0.909581
FBgn0012042	AttA	4443.37	3.65503	1.4333	2.55008	0.0107698	0.0872091
FBgn0012051	CalpA	2810.55	-0.104931	0.13152	-0.797833	0.424967	0.725485
FBgn0012058	Cdc27	1227.35	-0.191735	0.122769	-1.56175	0.118346	0.393871
FBgn0012344	Dh44	2016.54	0.0257568	0.120848	0.213134	0.831223	0.946248
FBgn0013263	Trl	230.013	0.536218	0.263023	2.03868	0.0414822	0.213608
FBgn0013269	Fkbp39	910.328	1.01576	0.172118	5.90152	3.60171e-09	4.29195e-07
FBgn0013272	Gp150	20289.7	-0.0921059	0.100909	-0.912759	0.361369	0.675661
FBgn0013275	Hsp70Aa	807.939	-0.891625	0.305386	-2.91966	0.00350409	0.0396263
FBgn0013276	Hsp70Ab	864.66	-0.825657	0.286083	-2.88608	0.00390073	0.0423706
FBgn0013277	Hsp70Ba	395.35	-0.573346	0.309785	-1.85079	0.0642003	0.2762
FBgn0013278	Hsp70Bb	478.522	-0.414749	0.315546	-1.31439	0.188716	0.504702
FBgn0013279	Hsp70Bc	456.958	-0.592974	0.304191	-1.94935	0.0512538	0.241747
FBgn0013303	Nca	1884.46	-0.0706992	0.123251	-0.573621	0.566224	0.816816
FBgn0013305	Nmda1	9086.61	-0.043417	0.153467	-0.282908	0.777248	0.924802
FBgn0013307	Odc1	3842.33	0.798817	0.239465	3.33584	0.000850432	0.0144264
FBgn0013308	Odc2	160.191	0.991903	0.364067	2.72451	0.00643974	0.0604029
FBgn0013323	Ptth	85.1496	-0.322153	0.421518	-0.764268	0.444708	0.739606
FBgn0013325	RpL11	26574.2	0.525672	0.220395	2.38513	0.017073	0.119166
FBgn0013334	Sap47	22073.9	-0.279333	0.175274	-1.59369	0.111005	0.381313
FBgn0013342	nSyb	27645.5	-0.316977	0.106233	-2.9838	0.00284691	0.0344489
FBgn0013343	Syx1A	2202.63	-0.072839	0.22521	-0.323428	0.746371	0.911184
FBgn0013347	TfIIA-S	1039.06	-0.356029	0.147995	-2.40569	0.016142	0.114608
FBgn0013348	TpnC41C	174.125	-1.12342	0.9192	-1.22217	0.221643	0.544383
FBgn0013432	bcn92	545.102	-0.23649	0.197617	-1.19671	0.231421	0.554493
FBgn0013433	beat-Ia	497.063	-0.246927	0.15531	-1.5899	0.111858	0.382407
FBgn0013435	Cdc2rk	277.298	-0.141245	0.182445	-0.774178	0.438825	0.735676
FBgn0013467	igl	5928.09	0.0594784	0.129479	0.459366	0.645972	0.866447
FBgn0013469	klu	119.873	0.162207	0.26407	0.614256	0.539046	0.804779
FBgn0013531	MED20	113.686	-0.282675	0.261074	-1.08274	0.278925	0.605948
FBgn0013548	l(2)dtl	220.132	0.0657456	0.17723	0.370962	0.710666	0.893971
FBgn0013563	Pex1	601.684	0.384434	0.192728	1.9947	0.0460754	0.227115
FBgn0013576	mtd	15864.1	-0.045148	0.135732	-0.332627	0.739416	0.908883
FBgn0013717	not	503.95	0.0139892	0.142623	0.0980849	0.921865	0.977035
FBgn0013718	nuf	4433.79	0.0268473	0.115128	0.233196	0.81561	0.940817
FBgn0013720	pck	770.043	0.0894423	0.121999	0.733141	0.463472	0.754233
FBgn0013725	phyl	780.707	-0.29937	0.166833	-1.79443	0.0727451	0.297786
FBgn0013726	pnut	1988.04	-0.198355	0.119421	-1.66098	0.096718	0.353895
FBgn0013732	sced	336.464	-0.0783902	0.177137	-0.442541	0.658098	0.871473
FBgn0013733	shot	32388	0.172435	0.248252	0.694596	0.487309	0.769364
FBgn0013746	alien	1215.77	0.101018	0.140229	0.720378	0.471292	0.75958
FBgn0013749	Arf102F	1513.21	0.321383	0.167127	1.92298	0.0544822	0.249501
FBgn0013750	Arf51F	1951.8	-0.160522	0.13332	-1.20404	0.228576	0.552522
FBgn0013751	Awh	99.0582	-0.19171	0.248386	-0.771821	0.44022	0.737092
FBgn0013753	Bgb	834.275	-0.358536	0.143307	-2.50187	0.012354	0.0953462
FBgn0013755	Bro	0.981165	1.18361	2.15127	0.550193	0.582187	NA
FBgn0013756	Mtor	2321.53	0.0961802	0.137531	0.699336	0.484342	0.768156
FBgn0013759	CASK	8087.11	0.018232	0.189963	0.0959763	0.923539	0.977974
FBgn0013762	Cdk5	590.904	-0.0211328	0.122143	-0.173017	0.862638	0.95452
FBgn0013763	Idgf6	26399.7	0.106975	0.280023	0.382021	0.702446	0.889141
FBgn0013764	Chi	1186.04	-0.147429	0.133514	-1.10423	0.269495	0.59553
FBgn0013765	cnn	2423.39	0.0867824	0.107734	0.805524	0.420517	0.723093
FBgn0013767	Crz	800.843	-0.193472	0.196804	-0.983068	0.325574	0.648522
FBgn0013770	Cp1	18639.8	-0.171128	0.174348	-0.981536	0.326329	0.648965
FBgn0013771	Cyp6a9	1651.04	-0.301372	0.128913	-2.33779	0.0193982	0.130469
FBgn0013772	Cyp6a8	145.912	-1.82411	0.232035	-7.86136	3.79975e-15	2.26317e-12
FBgn0013773	Cyp6a22	1022.5	0.0569267	0.179935	0.316374	0.751719	0.913273
FBgn0013799	Deaf1	1634.51	-0.0978981	0.11945	-0.819572	0.41246	0.717972
FBgn0013810	Dhc36C	63.4513	0.0128867	0.34425	0.0374342	0.970139	0.99032
FBgn0013811	Dhc62B	123.747	0.156395	0.397671	0.393278	0.694114	0.885674
FBgn0013812	Dhc93AB	139.343	1.21704	0.234192	5.19679	2.02764e-07	1.54113e-05
FBgn0013813	Dhc98D	30.9357	-0.103402	0.443583	-0.233107	0.815679	0.940817
FBgn0013949	Elal	4831.09	0.0747032	0.275889	0.270773	0.786566	0.928413
FBgn0013953	Esp	329.758	-0.0193915	0.152836	-0.126878	0.899037	0.967999
FBgn0013954	Fkbp12	4984.96	0.236025	0.115342	2.04631	0.040726	0.21185
FBgn0013972	Gycalpha99B	3602.87	-0.323215	0.148906	-2.1706	0.0299615	0.174669
FBgn0013973	Gycbeta100B	2147.62	0.0501586	0.127569	0.393187	0.694181	0.885674
FBgn0013981	His4r	9994.77	-0.0210128	0.188484	-0.111483	0.911233	0.972654
FBgn0013983	imd	643.089	0.0496422	0.148001	0.335417	0.73731	0.907652
FBgn0013987	MAPk-Ak2	2494.56	-0.111944	0.117438	-0.953219	0.340479	0.659133
FBgn0013995	Calx	7265.14	-0.335333	0.254634	-1.31692	0.187865	0.503148
FBgn0013997	Nrx-IV	2851.25	0.167243	0.160152	1.04428	0.296357	0.621891
FBgn0014000	Hf	4007.26	0.355375	0.26158	1.35857	0.174283	0.484923
FBgn0014002	Pdi	13883.2	0.431004	0.225468	1.9116	0.0559277	0.253745
FBgn0014006	Ask1	1886.87	0.118676	0.123068	0.964311	0.33489	0.654838
FBgn0014007	Ptp69D	1192.33	0.0768614	0.13526	0.568251	0.569864	0.81894
FBgn0014009	Rab2	3944.37	-0.289325	0.111392	-2.59734	0.00939475	0.0787565
FBgn0014010	Rab5	9275.11	-0.144947	0.109183	-1.32755	0.184325	0.498711
FBgn0014011	Rac2	1445.07	-0.0784436	0.127765	-0.613967	0.539237	0.804801
FBgn0014018	Rel	5262.07	0.0437961	0.264306	0.165702	0.868391	0.956444
FBgn0014019	Rh5	7463.44	-0.383895	0.140828	-2.72599	0.00641083	0.0603428
FBgn0014020	Rho1	8868.69	0.00585283	0.1534	0.038154	0.969565	0.990235
FBgn0014022	Rlb1	254.201	0.0145003	0.178957	0.0810271	0.93542	0.9818
FBgn0014023	mRpL47	482.798	0.0915045	0.14885	0.614745	0.538723	0.804774
FBgn0014024	Rnp4F	1232.44	0.033958	0.107017	0.317313	0.751006	0.91293
FBgn0014026	RpL7A	49881	0.333831	0.228745	1.4594	0.144455	0.439999
FBgn0014028	SdhB	5227.91	-0.384131	0.193457	-1.98562	0.0470759	0.230562
FBgn0014029	43710	1068.06	-0.1603	0.150207	-1.0672	0.285883	0.612378
FBgn0014031	Spat	6306.75	0.443864	0.243358	1.82391	0.0681654	0.285389
FBgn0014032	Sptr	777.659	0.119388	0.170862	0.698739	0.484715	0.768505
FBgn0014033	Sr-CI	1413.3	-0.0172646	0.271574	-0.0635724	0.949311	0.985243
FBgn0014037	Su(Tpl)	4386.69	0.0701969	0.130075	0.539665	0.589428	0.830389
FBgn0014073	Tie	1103.03	-0.0362343	0.124914	-0.290073	0.771761	0.922188
FBgn0014075	Uggt	2308.38	0.267762	0.119872	2.23373	0.0255008	0.155514
FBgn0014076	Vm32E	0.330838	0.212048	4.07815	0.0519962	0.958532	NA
FBgn0014092	CG4278	267.384	0.175308	0.162573	1.07833	0.280885	0.607926
FBgn0014127	barr	233.707	-0.0650673	0.162189	-0.401182	0.688286	0.882987
FBgn0014133	bif	7840.42	-0.269781	0.137857	-1.95696	0.0503517	0.239282
FBgn0014135	bnl	243.707	-0.540356	0.185341	-2.91547	0.00355156	0.0399961
FBgn0014141	cher	4558.61	-0.512602	0.170238	-3.01109	0.00260314	0.0323012
FBgn0014143	croc	68.495	-0.737156	0.276854	-2.66261	0.00775369	0.0690318
FBgn0014163	fax	7590.07	-0.618753	0.127781	-4.8423	1.28345e-06	7.12948e-05
FBgn0014179	gcm	5.59768	-0.710805	0.991881	-0.716623	0.473607	0.761494
FBgn0014184	Oda	29198	-0.0893629	0.122842	-0.727463	0.466942	0.756939
FBgn0014189	Hel25E	2112.27	0.179568	0.15883	1.13057	0.258237	0.583018
FBgn0014269	prod	659.96	-0.125096	0.133501	-0.937041	0.348738	0.667061
FBgn0014340	mof	268.114	0.0643429	0.207018	0.310809	0.755946	0.915277
FBgn0014342	mia	89.7262	0.540061	0.240237	2.24803	0.024574	0.152061
FBgn0014343	mirr	334.608	-0.21419	0.181441	-1.18049	0.237805	0.561827
FBgn0014366	noi	539.015	0.194418	0.157747	1.23246	0.217775	0.540321
FBgn0014368	nol	16.3868	-0.36902	0.558069	-0.661243	0.508456	0.784567
FBgn0014380	RhoL	474.058	-0.300607	0.144416	-2.08154	0.0373847	0.201509
FBgn0014388	sty	1478.01	0.361266	0.125539	2.87772	0.00400562	0.0432906
FBgn0014391	sun	3330.45	-0.50851	0.281219	-1.80823	0.0705703	0.292202
FBgn0014395	tilB	23.0877	-0.439901	0.538634	-0.816697	0.414102	0.7195
FBgn0014396	tim	14246.5	-0.0310083	0.122327	-0.253487	0.799892	0.935237
FBgn0014411	Vps26	1607.77	-0.132745	0.111148	-1.19431	0.232356	0.555134
FBgn0014417	CG13397	791.328	0.166717	0.146099	1.14112	0.253819	0.578504
FBgn0014427	CG11899	4196.58	0.153081	0.270247	0.566449	0.571088	0.819854
FBgn0014454	Acp1	5143.94	-7.39102	2.05782	-3.59167	NA	NA
FBgn0014455	Ahcy	3079.19	0.685054	0.232867	2.94182	0.00326286	0.0378583
FBgn0014464	Cp7Fa	61.7714	-0.325027	0.348707	-0.932092	0.351289	0.669339
FBgn0014465	Cp7Fb	37.2405	-0.62121	0.433006	-1.43464	0.151389	0.448639
FBgn0014466	Cp7Fc	14.1302	-0.444888	0.682932	-0.651437	0.514764	0.788962
FBgn0014469	Cyp4e2	2794.66	-0.279557	0.16288	-1.71633	0.0861012	0.330976
FBgn0014857	His3.3A	3244.44	-0.285765	0.115481	-2.47456	0.0133401	0.100718
FBgn0014859	Hr38	544.125	-0.271681	0.23717	-1.14551	0.251997	0.5766
FBgn0014861	Mcm2	94.5095	0.692423	0.417616	1.65804	0.0973099	0.35485
FBgn0014863	Mlp84B	8879.97	-0.973736	0.651678	-1.4942	0.135124	0.423338
FBgn0014865	Mtk	6229.56	2.27488	1.69589	1.34141	0.179789	0.492845
FBgn0014868	Ost48	1669.76	0.16839	0.162297	1.03755	0.299482	0.624658
FBgn0014869	Pglym78	8346.17	-0.365198	0.279783	-1.30529	0.191794	0.507334
FBgn0014870	Psi	3021.27	-0.0380917	0.133003	-0.286397	0.774574	0.923643
FBgn0014877	Roe1	787.247	0.299465	0.168904	1.77298	0.0762314	0.306326
FBgn0014879	Set	668.848	-0.0603307	0.134335	-0.449106	0.653355	0.869033
FBgn0014906	Hydr2	2960.19	0.165237	0.155762	1.06083	0.288766	0.614745
FBgn0014930	CG2846	1139.45	-0.167478	0.181904	-0.920697	0.357209	0.673416
FBgn0014931	CG2678	115.599	0.263034	0.26228	1.00288	0.31592	0.640624
FBgn0014949	btn	1.04087	0.768727	2.41784	0.317939	0.750531	NA
FBgn0015000	betaggt-I	551.808	-0.264764	0.140131	-1.8894	0.0588386	0.261529
FBgn0015001	iotaTry	3.48975	0.0438158	1.50614	0.0290914	0.976792	NA
FBgn0015010	Ag5r	13.8719	0.39383	0.556109	0.708189	0.478828	0.765168
FBgn0015011	AhcyL2	707.467	-0.0279657	0.140051	-0.199682	0.841729	0.949578
FBgn0015019	CCT3	1916.41	0.0719112	0.230685	0.311728	0.755247	0.915019
FBgn0015024	CkIalpha	8101.91	-0.0689876	0.131549	-0.524427	0.599982	0.836355
FBgn0015025	CkIIalpha-i1	118.848	0.162992	0.213541	0.763281	0.445296	0.739934
FBgn0015031	cype	3990.33	-0.455597	0.215601	-2.11315	0.0345879	0.192207
FBgn0015032	Cyp4c3	236.581	-0.347013	0.352122	-0.985488	0.324384	0.647572
FBgn0015033	Cyp4d8	517.043	0.345964	0.196682	1.759	0.078578	0.312592
FBgn0015034	Cyp4e1	282.659	-0.367995	0.295957	-1.24341	0.213718	0.537045
FBgn0015035	Cyp4e3	1460.98	-1.22179	0.329306	-3.71018	0.000207111	0.00476488
FBgn0015036	Cyp4ae1	1.81983	2.49153	1.77902	1.40051	0.16136	NA
FBgn0015037	Cyp4p1	3164.67	-0.332552	0.223645	-1.48696	0.137025	0.426675
FBgn0015038	Cyp9b1	705.212	-0.216679	0.223536	-0.969325	0.332383	0.65397
FBgn0015039	Cyp9b2	4178.13	-0.129536	0.22527	-0.575025	0.565274	0.816203
FBgn0015075	Ddx1	592.32	0.276354	0.139272	1.98427	0.0472253	0.230978
FBgn0015218	eIF4E1	5436.79	0.108087	0.114218	0.946321	0.343985	0.661975
FBgn0015221	Fer2LCH	18728.9	-0.123021	0.118824	-1.03532	0.300519	0.626139
FBgn0015222	Fer1HCH	17268.8	-0.164455	0.121709	-1.35121	0.176627	0.487919
FBgn0015229	glec	1409.26	0.12451	0.139263	0.89406	0.37129	0.684599
FBgn0015239	Hr78	1179.37	0.105746	0.118711	0.890782	0.373046	0.684599
FBgn0015240	Hr96	910.798	-0.123133	0.161473	-0.762564	0.445724	0.740089
FBgn0015245	Hsp60A	10135.3	0.397988	0.10333	3.8516	0.000117348	0.00297421
FBgn0015247	Diap2	2769.4	-0.0928963	0.110005	-0.844471	0.398406	0.704837
FBgn0015268	Nap1	41.0067	0.487486	0.368477	1.32297	0.185844	0.500611
FBgn0015269	Nf1	4271.94	0.0525222	0.167783	0.313037	0.754253	0.914745
FBgn0015270	Orc2	17.1158	0.356445	0.607084	0.587143	0.557108	0.81273
FBgn0015271	Orc5	64.1869	0.304513	0.306003	0.995131	0.319673	0.644091
FBgn0015277	Pi3K59F	1410.74	0.0527873	0.181888	0.290219	0.771649	0.922188
FBgn0015278	Pi3K68D	1907.84	0.0245857	0.112908	0.21775	0.827624	0.945239
FBgn0015279	Pi3K92E	1674.92	-0.0731368	0.126671	-0.577376	0.563685	0.815444
FBgn0015282	Rpt2	2278.58	-0.121111	0.164559	-0.73597	0.461749	0.7528
FBgn0015283	Rpn10	2020.88	-0.120228	0.153562	-0.782929	0.433669	0.730802
FBgn0015286	Rala	1236.18	-0.141779	0.148488	-0.954816	0.339671	0.658755
FBgn0015288	RpL22	16620.3	0.245824	0.217649	1.12945	0.258708	0.583259
FBgn0015295	Shark	494.747	0.14172	0.132174	1.07222	0.28362	0.609987
FBgn0015296	Shc	635.133	-0.294158	0.137675	-2.13662	0.0326288	0.184989
FBgn0015298	Srp19	433.68	0.351232	0.167012	2.10303	0.0354631	0.194974
FBgn0015299	Ssb-c31a	348.071	0.0976516	0.23704	0.411963	0.680367	0.879668
FBgn0015300	Ssl	1.68777	-0.594942	1.60451	-0.370794	0.710791	NA
FBgn0015316	Try29F	38.3444	-0.00962049	0.399712	-0.0240685	0.980798	0.993024
FBgn0015320	Ubc2	837.193	-0.220102	0.127534	-1.72583	0.0843773	0.327032
FBgn0015321	Ubc4	1347.34	-0.190337	0.12406	-1.53423	0.124972	0.406662
FBgn0015331	abs	605.412	0.00624587	0.157581	0.039636	0.968383	0.989897
FBgn0015336	CG15865	3.36483	-0.459315	1.06436	-0.43154	0.666076	NA
FBgn0015338	CG5861	687.729	-0.0824299	0.152044	-0.542145	0.587718	0.829397
FBgn0015351	CG14906	126.664	0.277117	0.231982	1.19456	0.232258	0.555134
FBgn0015359	CG2034	387.383	0.174946	0.170762	1.0245	0.305599	0.631864
FBgn0015360	oxt	1248.4	-0.0147367	0.136744	-0.107768	0.914179	0.974245
FBgn0015371	chn	5421.59	0.0156099	0.153235	0.10187	0.91886	0.976226
FBgn0015372	RabX1	695.288	-0.00876881	0.164746	-0.0532263	0.957552	0.987351
FBgn0015376	cutlet	130.732	0.408272	0.207838	1.96438	0.0494866	0.236218
FBgn0015379	dod	324.078	0.00793786	0.1566	0.0506886	0.959574	0.988051
FBgn0015380	drl	762.447	-0.0633132	0.144774	-0.437325	0.661876	0.873933
FBgn0015381	dsf	21.6213	-0.0531399	0.481494	-0.110364	0.91212	0.97331
FBgn0015391	glu	302.07	0.0735841	0.154155	0.477339	0.63312	0.860774
FBgn0015393	hoip	436.869	1.73151	0.221519	7.81654	5.4297e-15	2.91059e-12
FBgn0015396	jumu	227.353	-0.0302211	0.200533	-0.150704	0.88021	0.960151
FBgn0015399	kek1	1518.23	-0.153499	0.139677	-1.09895	0.271788	0.597486
FBgn0015400	kek2	1483.89	-0.0644048	0.145638	-0.442224	0.658327	0.871473
FBgn0015402	ksr	1427.25	-0.266998	0.166197	-1.60651	0.108161	0.37686
FBgn0015477	Rme-8	2419.18	0.199567	0.130957	1.52391	0.127531	0.410383
FBgn0015509	Cul1	4550.32	-0.0536033	0.117784	-0.4551	0.649038	0.868381
FBgn0015513	mbc	4602.68	0.394524	0.118267	3.33587	0.000850328	0.0144264
FBgn0015519	nAChRalpha3	963.513	-0.0477349	0.167996	-0.284142	0.776301	0.924339
FBgn0015520	nonA-l	506.4	-0.102614	0.161731	-0.634475	0.525771	0.795957
FBgn0015521	RpS21	8066.56	0.745555	0.226212	3.29583	0.000981311	0.0161112
FBgn0015522	olf186-M	1192.94	0.797678	0.23687	3.36757	0.000758325	0.0133279
FBgn0015524	otp	151.336	-0.0133799	0.237308	-0.056382	0.955038	0.986792
FBgn0015527	peng	770.273	0.664471	0.201727	3.2939	0.000988059	0.0161362
FBgn0015543	snoRNA:Me28S-A1322	40.3195	0.990763	0.428351	2.31297	0.0207243	0.136298
FBgn0015544	spag	405.377	-0.10088	0.177552	-0.568169	0.56992	0.81894
FBgn0015546	spel1	566.329	-0.262618	0.14254	-1.84241	0.0654145	0.278077
FBgn0015550	tap	3.35427	0.708222	1.22446	0.578394	0.562998	NA
FBgn0015553	tos	129.181	0.646132	0.251069	2.57353	0.0100668	0.0832451
FBgn0015558	tty	3913.64	-0.123844	0.129497	-0.956348	0.338896	0.658381
FBgn0015561	unpg	6.97097	0.372877	0.838026	0.444946	0.656359	0.871012
FBgn0015568	alpha-Est1	3041.36	-0.843785	0.25638	-3.29115	0.000997785	0.0162572
FBgn0015569	alpha-Est10	743.048	-0.00409171	0.160389	-0.0255111	0.979647	0.992813
FBgn0015570	alpha-Est2	2856.01	0.812197	0.229333	3.54157	0.000397753	0.00815355
FBgn0015572	alpha-Est4	45.4257	0.17272	0.397982	0.433989	0.664296	0.874882
FBgn0015574	alpha-Est6	3.52346	-1.24432	1.27333	-0.977221	0.32846	NA
FBgn0015575	alpha-Est7	10222.3	0.172318	0.152466	1.13021	0.258389	0.583074
FBgn0015576	alpha-Est8	3791.55	0.257243	0.15319	1.67924	0.0931048	0.347334
FBgn0015577	alpha-Est9	2339.66	0.333959	0.132218	2.52582	0.0115428	0.0914381
FBgn0015582	dare	350.735	0.0697415	0.177215	0.393541	0.69392	0.885635
FBgn0015584	Acp53Ea	0.866059	-0.501878	2.58876	-0.193868	0.846279	NA
FBgn0015585	Acp63F	5.97832	1.06137	0.914893	1.1601	0.246007	0.569322
FBgn0015586	Acp76A	0.301818	0.212048	4.08047	0.0519666	0.958555	NA
FBgn0015589	Apc	4744.9	0.0560556	0.158016	0.354746	0.72278	0.900767
FBgn0015591	AstA	865.108	-0.139494	0.157417	-0.886146	0.375539	0.686237
FBgn0015600	toc	5338.67	-0.0195427	0.133116	-0.14681	0.883282	0.960949
FBgn0015602	BEAF-32	699.754	-0.0604942	0.139407	-0.433939	0.664332	0.874882
FBgn0015609	CadN	4216.84	-0.253147	0.217589	-1.16342	0.24466	0.567555
FBgn0015614	CanB2	1681.84	-0.175796	0.127296	-1.381	0.167279	0.474946
FBgn0015615	SMC3	1309.17	-0.0698338	0.123364	-0.566081	0.571339	0.819854
FBgn0015618	Cdk8	123.704	0.19651	0.212173	0.926175	0.354355	0.670955
FBgn0015621	Clp	114.914	-0.0602543	0.238511	-0.252627	0.800557	0.935237
FBgn0015622	Cnx99A	8554.24	0.00821823	0.117006	0.0702379	0.944004	0.984113
FBgn0015623	Cpr	8833.96	0.0118269	0.120049	0.0985175	0.921521	0.976971
FBgn0015625	CycB3	33.6682	-0.295183	0.375343	-0.786435	0.431613	0.730322
FBgn0015663	Ugt36A1	438.833	-0.182961	0.183516	-0.996973	0.318778	0.643299
FBgn0015664	Dref	979.106	0.0693503	0.146158	0.474489	0.635151	0.861956
FBgn0015714	Cyp6a17	3101.32	-0.288758	0.127896	-2.25776	0.0239605	0.149514
FBgn0015721	ktub	208.122	-0.08591	0.196489	-0.437226	0.661947	0.873933
FBgn0015737	Hmu	3906.58	0.073585	0.128907	0.570838	0.56811	0.817915
FBgn0015754	Lis-1	6197.92	-0.0447049	0.0945548	-0.472794	0.63636	0.862458
FBgn0015756	RpL9	29027	0.300784	0.239692	1.25488	0.209523	0.53175
FBgn0015765	p38a	338.794	0.0425557	0.171172	0.248614	0.803659	0.936729
FBgn0015766	Msr-110	48620.9	-0.074926	0.121508	-0.616636	0.537475	0.804075
FBgn0015772	Nak	5042.61	-0.0404532	0.140456	-0.288014	0.773336	0.922856
FBgn0015773	NetA	137.853	0.266445	0.258713	1.02989	0.303063	0.62941
FBgn0015774	NetB	1966.19	0.0160638	0.190613	0.0842742	0.932838	0.981063
FBgn0015776	nrv1	5110.69	-0.35046	0.111252	-3.15015	0.00163187	0.0233582
FBgn0015777	nrv2	10765.3	-0.04157	0.233023	-0.178395	0.858413	0.953775
FBgn0015778	rin	3904.64	0.145159	0.107973	1.3444	0.178818	0.491441
FBgn0015781	P5cr	614.786	0.124025	0.12482	0.993627	0.320405	0.645293
FBgn0015789	Rab10	3461.48	0.013282	0.145698	0.0911609	0.927365	0.978869
FBgn0015790	Rab11	5007.84	-0.0369357	0.0986066	-0.374576	0.707976	0.892545
FBgn0015791	Rab14	2869.85	-0.157359	0.124886	-1.26002	0.207663	0.530008
FBgn0015793	Rab19	542.914	-0.235467	0.1531	-1.53799	0.12405	0.405012
FBgn0015794	Rab18	1231.49	-0.0497999	0.145768	-0.341638	0.732623	0.905622
FBgn0015795	Rab7	6593.5	-0.330095	0.13352	-2.47225	0.0134267	0.101229
FBgn0015797	Rab6	1371.02	-0.189397	0.115517	-1.63956	0.101097	0.362168
FBgn0015799	Rbf	1211.88	0.173378	0.13245	1.309	0.190534	0.506124
FBgn0015801	Reg-5	3537.63	-0.357912	0.179101	-1.99838	0.0456754	0.225662
FBgn0015803	RtGEF	1392.49	0.0933767	0.152759	0.61127	0.541021	0.805484
FBgn0015805	HDAC1	983.568	0.507493	0.151584	3.34793	0.000814171	0.0140333
FBgn0015808	ScpX	3504.39	0.169661	0.152244	1.1144	0.265106	0.591247
FBgn0015818	Spx	282.459	0.0265718	0.17351	0.153142	0.878286	0.959538
FBgn0015828	TfIIEalpha	577.463	-0.153638	0.141481	-1.08593	0.277512	0.604839
FBgn0015829	TfIIEbeta	482.242	-0.143622	0.154303	-0.93078	0.351967	0.669525
FBgn0015831	Rtnl2	1.85256	1.20003	1.78785	0.671215	0.502083	NA
FBgn0015834	eIF3i	4170.93	0.2298	0.15108	1.52105	0.128248	0.411352
FBgn0015838	Vang	449.068	-0.100838	0.156514	-0.644277	0.519396	0.791703
FBgn0015872	Drip	1333.07	0.528978	0.201474	2.62554	0.00865129	0.0743193
FBgn0015903	apt	514.572	0.13418	0.165567	0.810428	0.417694	0.721317
FBgn0015904	ara	142.315	-0.307027	0.21059	-1.45793	0.144859	0.440299
FBgn0015905	ast	314.977	0.453427	0.222015	2.04232	0.0411198	0.212819
FBgn0015919	caup	207.357	-0.294702	0.170713	-1.7263	0.0842935	0.326839
FBgn0015924	crq	4599.52	-0.163503	0.115692	-1.41326	0.15758	0.458606
FBgn0015925	csul	279.194	0.345575	0.173503	1.99175	0.0463985	0.228183
FBgn0015926	dah	4.02659	-0.184586	1.10082	-0.16768	0.866835	NA
FBgn0015929	dpa	176.838	0.184043	0.282949	0.650444	0.515405	0.789155
FBgn0015946	grim	3.55953	0.396518	1.11552	0.355456	0.722248	NA
FBgn0015949	hrg	3348.47	-0.050943	0.118687	-0.429221	0.667763	0.876873
FBgn0016013	Faa	1108.58	-0.734502	0.218171	-3.36664	0.000760892	0.0133511
FBgn0016031	lama	3112.02	0.166952	0.136313	1.22477	0.220662	0.543219
FBgn0016032	lbm	405.575	-0.0175385	0.155626	-0.112696	0.910272	0.972654
FBgn0016034	mael	36.3354	-0.0732564	0.367484	-0.199346	0.841992	0.949578
FBgn0016036	mei-P22	7.07834	-0.47617	0.944464	-0.504169	0.614142	0.847457
FBgn0016038	Vsp37A	1188.47	-0.20095	0.119107	-1.68715	0.0915753	0.343279
FBgn0016041	Tom40	1784.35	0.387445	0.114486	3.38421	0.00071383	0.0127348
FBgn0016047	nompA	197.515	0.161689	0.201161	0.803778	0.421525	0.723422
FBgn0016053	pgc	0.958921	-0.735662	1.97059	-0.37332	0.70891	NA
FBgn0016054	phr6-4	65.8583	-0.19189	0.291312	-0.658709	0.510083	0.785849
FBgn0016059	Sema1b	2601.52	0.0693394	0.122509	0.565995	0.571397	0.819854
FBgn0016061	side	1943.38	0.145944	0.140117	1.04159	0.297604	0.622893
FBgn0016070	smg	1756.95	0.351592	0.131949	2.66461	0.0077078	0.0687482
FBgn0016075	vkg	7709.54	-0.457991	0.308587	-1.48415	0.137768	0.427623
FBgn0016076	vri	5431.91	0.0474749	0.155112	0.306069	0.759552	0.916919
FBgn0016078	wun	1082.13	-0.181677	0.128425	-1.41466	0.157168	0.457839
FBgn0016080	xmas	72.4987	-0.72227	0.312296	-2.31277	0.0207352	0.136298
FBgn0016081	fry	8080.65	-0.299566	0.191502	-1.5643	0.117748	0.392774
FBgn0016119	ATPsynCF6	5828.29	-0.476866	0.251915	-1.89296	0.0583626	0.260556
FBgn0016120	ATPsynD	7425.88	-0.494807	0.247637	-1.99811	0.0457043	0.2257
FBgn0016122	Acer	9984.19	0.492103	0.225909	2.17833	0.0293818	0.172415
FBgn0016123	Alp4	1661.15	-0.152719	0.219423	-0.696003	0.486427	0.769083
FBgn0016126	CaMKI	13712.5	0.288796	0.167713	1.72197	0.0850747	0.328917
FBgn0016131	Cdk4	447.108	0.649	0.249013	2.60629	0.00915277	0.0772862
FBgn0016641	PTP-ER	2286.59	-0.0646164	0.143701	-0.449658	0.652957	0.869033
FBgn0016650	Lgr1	1052.31	-0.146926	0.145179	-1.01203	0.311522	0.635591
FBgn0016660	H15	38.7726	-0.10469	0.352569	-0.296934	0.766517	0.919664
FBgn0016672	Ipp	7025.22	-0.206591	0.103741	-1.99141	0.0464357	0.228261
FBgn0016675	Lectin-galC1	2.84891	-0.0204618	1.18266	-0.0173014	0.986196	NA
FBgn0016684	NaPi-T	33.7886	1.00711	0.400119	2.51702	0.0118352	0.0929559
FBgn0016685	Nlp	1430	0.385434	0.203656	1.89257	0.0584148	0.260618
FBgn0016687	Nurf-38	5131.94	0.324848	0.162719	1.99637	0.0458938	0.226428
FBgn0016691	ATPsynO	6790.56	-0.513818	0.277116	-1.85416	0.0637159	0.274667
FBgn0016693	Past1	2443.81	0.0642963	0.142151	0.452311	0.651045	0.868658
FBgn0016694	Pdp1	11909.2	-0.108094	0.0958797	-1.12739	0.259578	0.583831
FBgn0016696	Pitslre	13053.2	-0.0461595	0.131321	-0.351501	0.725213	0.90145
FBgn0016697	Prosalpha5	1294.79	0.000819361	0.185702	0.00441223	0.99648	0.998646
FBgn0016698	Ptpa	550.983	-0.223554	0.167048	-1.33826	0.180811	0.494004
FBgn0016701	Rab4	2253.85	-0.205773	0.117272	-1.75466	0.079317	0.314831
FBgn0016715	Reg-2	1396.12	0.0233443	0.233031	0.100177	0.920204	0.976322
FBgn0016726	RpL29	12108.2	0.638456	0.230001	2.77588	0.00550531	0.0540004
FBgn0016754	sba	2302.75	-0.0025342	0.157704	-0.0160693	0.987179	0.994881
FBgn0016756	Usp47	6689.85	-0.230279	0.132986	-1.7316	0.0833446	0.324333
FBgn0016762	angel	193.247	-0.357875	0.190665	-1.87698	0.0605211	0.266467
FBgn0016794	dos	994.8	-0.15819	0.126497	-1.25054	0.211103	0.533412
FBgn0016797	fz2	3774.9	0.337218	0.134978	2.49832	0.0124783	0.0958994
FBgn0016917	Stat92E	11695.3	0.149648	0.187448	0.798347	0.424669	0.72542
FBgn0016919	nompB	225.014	-0.200111	0.217586	-0.919686	0.357737	0.673621
FBgn0016920	nompC	127.669	-0.263696	0.283505	-0.930129	0.352304	0.669691
FBgn0016926	Pino	6594.76	0.0898277	0.151183	0.594167	0.552401	0.810712
FBgn0016930	Dyrk2	3851.58	-0.00357733	0.167782	-0.0213213	0.982989	0.994116
FBgn0016970	l(2)k10201	90.269	-0.175917	0.252887	-0.695635	0.486658	0.769083
FBgn0016974	swaPsi	4.21511	0.288812	1.01411	0.284794	0.775802	NA
FBgn0016977	spen	10511.1	0.0798821	0.242015	0.33007	0.741347	0.909262
FBgn0016978	snRNP-U1-70K	1731.71	0.0384684	0.10866	0.354026	0.723319	0.900767
FBgn0016983	smid	2014.01	0.0781038	0.121288	0.643955	0.519604	0.791703
FBgn0016984	sktl	1510.61	-0.194039	0.132448	-1.46502	0.142916	0.436401
FBgn0017414	cag	239.859	-0.2045	0.175762	-1.1635	0.244625	0.567555
FBgn0017418	ari-1	3391.95	-0.091095	0.0976569	-0.932807	0.35092	0.66933
FBgn0017429	CG5989	902.116	-0.122079	0.150531	-0.810987	0.417373	0.721317
FBgn0017430	Nelf-E	359.022	-0.126583	0.161485	-0.783871	0.433116	0.730802
FBgn0017448	CG2187	2.97907	-0.0544672	1.3593	-0.0400701	0.968037	NA
FBgn0017456	Ubc84D	24.5718	-0.166333	0.436073	-0.381435	0.702881	0.889364
FBgn0017457	U2af38	528.685	0.108211	0.168388	0.642629	0.520465	0.792199
FBgn0017482	T3dh	384.529	0.517952	0.266393	1.94431	0.0518581	0.243313
FBgn0017545	RpS3A	42301.2	0.527722	0.198534	2.6581	0.00785829	0.0695695
FBgn0017550	Rga	1420.76	0.0756695	0.106666	0.709407	0.478072	0.764872
FBgn0017551	Rca1	243.292	-0.0372817	0.195154	-0.191037	0.848496	0.952338
FBgn0017556	Prosalpha4T2	4.09232	0.130754	0.9701	0.134784	0.892782	NA
FBgn0017558	Pdk	9578.6	0.0980551	0.22596	0.43395	0.664325	0.874882
FBgn0017561	Ork1	1680.31	1.28758	0.157705	8.16451	3.2274e-16	3.4601e-13
FBgn0017566	ND-75	11098.9	-0.134712	0.186268	-0.723218	0.469546	0.759145
FBgn0017567	ND-23	3187.71	-0.268186	0.198161	-1.35337	0.175936	0.487141
FBgn0017572	Mo25	2041.32	-0.290501	0.106108	-2.73779	0.00618543	0.0586832
FBgn0017577	Mcm5	62.1911	0.731291	0.476026	1.53624	0.124479	0.406003
FBgn0017578	Max	446.735	-0.0690384	0.177775	-0.388348	0.697758	0.887231
FBgn0017579	RpL14	28661.2	0.35433	0.223152	1.58784	0.112323	0.382995
FBgn0017581	Lk6	39941.4	-0.0438349	0.199428	-0.219803	0.826025	0.944506
FBgn0017590	klg	2207.28	-0.224409	0.165157	-1.35876	0.174223	0.484902
FBgn0019624	COX5A	9330.43	-0.545766	0.267991	-2.0365	0.0416997	0.214372
FBgn0019643	AANAT1	3826.95	-0.264956	0.171235	-1.54732	0.121785	0.401272
FBgn0019644	ATPsynB	8995.76	-0.376586	0.255027	-1.47665	0.139769	0.431599
FBgn0019650	toy	2485.92	-0.239852	0.147605	-1.62495	0.104172	0.368956
FBgn0019660	lncRNA:roX2	2.31757	0.65319	1.25191	0.521756	0.60184	NA
FBgn0019661	lncRNA:roX1	144.836	0.602986	0.340558	1.77058	0.0766301	0.307467
FBgn0019662	qm	2252.52	-0.340289	0.128292	-2.65246	0.00799065	0.0704504
FBgn0019686	lok	189.149	0.211864	0.262447	0.807265	0.419514	0.722628
FBgn0019809	gcm2	9.28066	0.148461	0.711759	0.208583	0.834774	0.947208
FBgn0019830	colt	3305.14	0.205898	0.139617	1.47473	0.140285	0.432432
FBgn0019890	Smg5	4823.78	-0.0353533	0.124894	-0.283067	0.777125	0.924802
FBgn0019925	Surf4	3098.13	0.438194	0.139134	3.14943	0.00163587	0.0233842
FBgn0019928	Ser8	1.18226	0.586156	1.83032	0.320247	0.748781	NA
FBgn0019929	Ser7	2240.47	0.365221	0.132708	2.75207	0.00592195	0.056756
FBgn0019932	SamDC	1205.33	1.15886	0.189546	6.1139	9.72235e-10	1.42785e-07
FBgn0019936	RpS20	18323	0.76817	0.232367	3.30584	0.000946921	0.0156666
FBgn0019938	RpI1	876.757	0.927487	0.153523	6.04137	1.5281e-09	2.19439e-07
FBgn0019940	Rh6	14000.8	-0.13253	0.16139	-0.821183	0.411542	0.716955
FBgn0019949	Cdk9	511.009	-0.0798476	0.142372	-0.560838	0.574908	0.821818
FBgn0019952	Orct	1836.89	0.150208	0.150427	0.998546	0.318015	0.642676
FBgn0019957	ND-42	4637.7	-0.381408	0.252635	-1.50972	0.131115	0.416623
FBgn0019960	Mitofilin	5224.07	-0.250955	0.166786	-1.50465	0.132414	0.419239
FBgn0019968	Khc-73	6702.96	-0.00663537	0.155004	-0.0428079	0.965855	0.98968
FBgn0019972	Drice	540.161	-0.291975	0.230464	-1.2669	0.205191	0.526794
FBgn0019982	Gs1l	2239.53	-0.0365621	0.175433	-0.208411	0.834908	0.947208
FBgn0019985	mGluR	1638.6	0.165706	0.173209	0.95668	0.338729	0.658359
FBgn0019990	Gcn2	1158.96	0.123983	0.107672	1.15148	0.249535	0.574092
FBgn0020018	Ppox	369.053	-0.247241	0.198088	-1.24814	0.21198	0.535039
FBgn0020224	Cbl	1859.57	-0.19633	0.138389	-1.41868	0.155991	0.455939
FBgn0020235	ATPsyngamma	9360.71	-0.39524	0.271776	-1.45429	0.145867	0.440914
FBgn0020236	ATPCL	13100.6	-0.0445012	0.279917	-0.15898	0.873685	0.958249
FBgn0020238	14-3-3epsilon	17747.2	0.0752598	0.112779	0.66732	0.504568	0.782507
FBgn0020248	stet	39.7435	-0.135256	0.334203	-0.404711	0.68569	0.881554
FBgn0020249	stck	2811.62	-0.0222041	0.112546	-0.19729	0.843601	0.949826
FBgn0020251	sfl	1758.07	0.0631085	0.151041	0.417823	0.676076	0.879017
FBgn0020255	Ran	3620.14	0.150973	0.152732	0.988483	0.322916	0.646374
FBgn0020257	Ppa	989.693	-0.261465	0.170216	-1.53608	0.124519	0.406003
FBgn0020258	ppk	74.433	-0.117051	0.27774	-0.421442	0.673433	0.87856
FBgn0020261	pcm	1492.54	0.174718	0.144386	1.21007	0.226251	0.549781
FBgn0020269	mspo	1310.78	-0.223336	0.157377	-1.41911	0.155866	0.455695
FBgn0020270	mre11	528.835	-0.304511	0.183116	-1.66294	0.0963239	0.353056
FBgn0020272	mst	109.435	0.559281	0.24485	2.28418	0.0223607	0.142781
FBgn0020277	lush	23.9393	0.207314	0.52166	0.397412	0.691063	0.884644
FBgn0020278	loco	1336.43	0.101241	0.107403	0.942632	0.345869	0.664289
FBgn0020279	lig	6462.11	0.0728767	0.121217	0.60121	0.5477	0.808231
FBgn0020294	ko	1255.17	0.242923	0.13468	1.8037	0.0712784	0.29414
FBgn0020299	stumps	1636.81	0.0487263	0.110744	0.439991	0.659944	0.872649
FBgn0020300	geko	256.953	-0.714371	0.252923	-2.82446	0.004736	0.0485939
FBgn0020304	drongo	6160.65	-0.319105	0.16066	-1.98622	0.0470092	0.230341
FBgn0020305	dbe	335.387	0.507669	0.202338	2.50901	0.012107	0.0939211
FBgn0020306	dom	6632.14	0.707157	0.153189	4.61623	3.90783e-06	0.000176033
FBgn0020307	dve	464.732	-0.0653913	0.192705	-0.339334	0.734358	0.906095
FBgn0020309	crol	5629.34	0.115578	0.132268	0.87382	0.382216	0.691874
FBgn0020312	Tmtc3	911.179	-0.0470993	0.139477	-0.337685	0.735601	0.906733
FBgn0020369	Rpt6	1664.99	-0.117734	0.163329	-0.720837	0.47101	0.759478
FBgn0020370	TppII	2986.59	0.0752165	0.110054	0.683449	0.494323	0.77482
FBgn0020371	Tim17b2	0.879938	3.3678	2.40084	1.40276	0.160688	NA
FBgn0020372	TM4SF	5120.33	-0.528734	0.28966	-1.82536	0.0679471	0.285112
FBgn0020377	Sr-CII	1.53212	-0.84927	1.57973	-0.537606	0.590849	NA
FBgn0020378	Sp1	217.26	0.163826	0.206605	0.792944	0.427811	0.727353
FBgn0020379	Rfx	1122.92	0.25017	0.109172	2.29151	0.0219338	0.140978
FBgn0020381	Dredd	774.496	0.310462	0.13369	2.32226	0.0202189	0.134471
FBgn0020385	pug	9309.17	0.619966	0.223636	2.77221	0.00556779	0.0544637
FBgn0020386	Pdk1	5172.64	-0.0761204	0.0982822	-0.774509	0.43863	0.735594
FBgn0020388	Gcn5	1454.44	-0.0561727	0.130679	-0.429853	0.667303	0.876873
FBgn0020389	Papss	1318.98	0.390672	0.176874	2.20877	0.0271909	0.163496
FBgn0020391	Nrk	275.595	-0.111506	0.238874	-0.466798	0.640644	0.863608
FBgn0020392	Nmt	665.34	0.268295	0.154415	1.73749	0.0823004	0.322456
FBgn0020399	Mst89B	4.23563	-0.161536	0.965824	-0.167252	0.867172	NA
FBgn0020407	asun	231.382	-0.110847	0.158894	-0.697615	0.485418	0.768669
FBgn0020412	JIL-1	1993.23	0.12106	0.116507	1.03908	0.29877	0.623902
FBgn0020414	Idgf3	5567.31	0.136725	0.245545	0.556822	0.577649	0.823315	ATP binding cassette subfamily D
FBgn0020415	Idgf2	6046.41	0.590414	0.25233	2.33985	0.0192913	0.129913	carboxylation of acetyl-CoA to malonyl-CoA
FBgn0020416	Idgf1	4985.2	0.420455	0.230511	1.82401	0.0681501	0.285389
FBgn0020429	GluRIIB	7.3673	0.703262	0.782318	0.898945	0.368682	0.683292	Acyl-CoA oxidase
FBgn0020440	Fak	2143.57	0.110837	0.129769	0.854106	0.393046	0.700091
FBgn0020443	eRF3	2886.14	0.473368	0.134474	3.52016	0.000431294	0.00864281
FBgn0020445	E23	340.852	0.224175	0.160915	1.39313	0.163581	0.468292
FBgn0020493	Dad	1404.68	-0.23241	0.125939	-1.84542	0.0649767	0.276984
FBgn0020496	CtBP	5489.31	0.0777724	0.10467	0.743026	0.457466	0.74832
FBgn0020497	emb	2965.58	0.262046	0.132218	1.98193	0.0474871	0.231518	Long-chain-fatty-acid--CoA ligase
FBgn0020503	CLIP-190	11790.1	-0.0218095	0.101182	-0.215547	0.829341	0.946091
FBgn0020506	Amyrel	2.28627	-1.68564	1.37715	-1.22401	0.220949	NA
FBgn0020508	Ag5r2	2.12429	1.92384	1.56956	1.22572	0.220305	NA
FBgn0020510	Abi	1161.07	-0.000381181	0.121869	-0.00312778	0.997504	0.998646
FBgn0020513	Paics	16451.8	0.120872	0.222505	0.543233	0.58697	0.829104
FBgn0020518	snoRNA:Me28S-G764	0.353794	-1.81457	4.02449	-0.450882	0.652075	NA
FBgn0020521	pio	4561.56	-0.242885	0.271781	-0.893679	0.371494	0.684599
FBgn0020545	kraken	1761.53	-0.0556913	0.197033	-0.282649	0.777446	0.924802
FBgn0020616	SA	1075.37	0.190514	0.146869	1.29717	0.194571	0.510898
FBgn0020617	Rx	155.821	-0.238917	0.216694	-1.10256	0.27022	0.595606
FBgn0020618	Rack1	39465.9	0.433193	0.187708	2.3078	0.0210103	0.137516
FBgn0020620	RN-tre	1931.52	-0.00501368	0.117178	-0.0427869	0.965871	0.98968
FBgn0020621	Pkn	9988.44	-0.178359	0.11899	-1.49894	0.133889	0.421812
FBgn0020622	Pi3K21B	813.032	0.173289	0.126884	1.36573	0.172024	0.481552
FBgn0020626	Osbp	2521.22	-0.042933	0.100612	-0.426716	0.669586	0.877756
FBgn0020633	Mcm7	9.22972	0.785913	0.925627	0.84906	0.395848	0.702054
FBgn0020637	Lcp65Ag2	61.2715	-0.621965	0.432164	-1.43919	0.150098	0.447248
FBgn0020638	Lcp65Ag1	23.5079	-0.361158	0.646313	-0.558797	0.5763	0.82242
FBgn0020640	Lcp65Ae	0.652029	0.584749	3.31445	0.176424	0.859961	NA
FBgn0020642	Lcp65Ac	17.0936	-0.131866	0.708664	-0.186076	0.852385	0.952545
FBgn0020647	KrT95D	3722.81	-0.0553483	0.122323	-0.452477	0.650926	0.868658
FBgn0020653	Trxr-1	5324.69	-0.0604929	0.142847	-0.42348	0.671945	0.878472
FBgn0020655	ArfGAP1	1451	0.133533	0.117428	1.13714	0.255479	0.580177
FBgn0020660	eIF4B	5026.48	0.131378	0.14708	0.893241	0.371728	0.684599
FBgn0020762	Atet	3881.52	-0.0120106	0.117504	-0.102214	0.918586	0.976032
FBgn0020764	Alas	3105.21	-0.886211	0.133245	-6.651	2.91118e-11	6.92681e-09
FBgn0020765	Acp65Aa	26.5993	-5.59424	1.88472	-2.96821	0.00299541	0.0358813
FBgn0020767	Spred	3552.06	-0.0351361	0.160502	-0.218913	0.826718	0.944506
FBgn0020880	CG7179	0.335871	-1.74873	4.02989	-0.43394	0.664332	NA
FBgn0020887	Su(z)12	1372.6	0.0947379	0.146775	0.645465	0.518626	0.791045
FBgn0020906	Jon25Bi	0.957932	-3.26792	2.82813	-1.15551	0.247882	NA
FBgn0020907	Scp2	5209.65	0.664861	0.191209	3.47715	0.000506774	0.00977889
FBgn0020908	Scp1	192.972	-0.147619	0.797895	-0.18501	0.853221	0.952545
FBgn0020909	Rtc1	293.838	0.75815	0.176289	4.30062	1.70322e-05	0.000621096
FBgn0020910	RpL3	49587.6	0.432301	0.237071	1.82351	0.0682261	0.285389
FBgn0020912	Ptx1	115.867	-0.22711	0.278355	-0.815902	0.414556	0.71975
FBgn0020930	Dgkepsilon	1803.75	-0.58714	0.113369	-5.17901	2.23062e-07	1.66073e-05
FBgn0021738	Crg-1	441.655	-0.851107	0.213319	-3.98983	6.61207e-05	0.00185571
FBgn0021742	C901	21.4958	-0.512116	0.532031	-0.962568	0.335765	0.655569
FBgn0021750	SerRS-m	415.083	0.0881612	0.147729	0.596778	0.550655	0.810218
FBgn0021760	chb	2424.44	0.0147006	0.141437	0.103938	0.917219	0.975536
FBgn0021761	Nup154	827.74	0.482395	0.144193	3.34549	0.000821366	0.0141346
FBgn0021764	sdk	1699.75	0.0559262	0.177139	0.31572	0.752215	0.91343
FBgn0021765	scu	5813.75	0.304019	0.192535	1.57904	0.114328	0.387116
FBgn0021767	org-1	0.76679	-0.330307	2.31564	-0.142642	0.886573	NA
FBgn0021768	nudC	581.432	0.187827	0.151405	1.24056	0.214768	0.537303
FBgn0021776	mira	26.5371	-0.154937	0.440451	-0.351768	0.725012	0.901387
FBgn0021795	Tapdelta	1745.67	0.722982	0.145086	4.98314	6.25597e-07	3.82011e-05
FBgn0021796	Tor	2007.68	0.146278	0.122787	1.19132	0.233528	0.556262
FBgn0021800	Reph	3065.53	-0.0534804	0.112249	-0.476442	0.633759	0.860939
FBgn0021814	Vps28	938.428	-0.324675	0.142592	-2.27696	0.0227887	0.144639
FBgn0021818	cnk	1369.35	-0.0110042	0.140891	-0.0781043	0.937745	0.982273	1-acylglycerol-3-phosphate O-acyltransferase
FBgn0021825	DCTN2-p50	1276.62	-0.233612	0.130409	-1.79138	0.0732325	0.298981
FBgn0021847	Ttc7	2179.1	-0.00381744	0.125353	-0.0304535	0.975705	0.991605
FBgn0021856	l(2)k14505	666.933	-0.0971254	0.152786	-0.635697	0.524974	0.795631	S-adenosyl-L-homocysteine hydrolase - Met metabolism
FBgn0021872	Xbp1	14244.3	-0.0253415	0.170958	-0.148232	0.88216	0.960508
FBgn0021874	Nle	404.03	0.630104	0.207179	3.04135	0.00235517	0.0299169
FBgn0021875	Zfrp8	354.758	0.0358578	0.202827	0.17679	0.859673	0.954102
FBgn0021895	ytr	1471.32	0.234773	0.189014	1.24209	0.214202	0.537058
FBgn0021906	RFeSP	7158.07	-0.407426	0.218144	-1.8677	0.0618045	0.270231
FBgn0021944	Coprox	478.08	-0.110473	0.148394	-0.744454	0.456602	0.747706
FBgn0021967	ND-PDSW	2786.69	-0.314468	0.198829	-1.5816	0.113741	0.385647	L-aminoadipate-semialdehyde dehydrogenase
FBgn0021979	l(2)k09913	9808.95	0.0387948	0.128808	0.301184	0.763275	0.919033
FBgn0021995	Rs1	721.661	0.721782	0.167173	4.31757	1.57755e-05	0.000583205
FBgn0022023	eIF3h	4291.96	0.198538	0.129423	1.53403	0.125022	0.406662
FBgn0022027	Vps25	492.089	-0.308751	0.163576	-1.88751	0.0590918	0.262119
FBgn0022029	l(2)k01209	1221.42	0.389332	0.151835	2.56418	0.0103421	0.0846356
FBgn0022069	Nnp-1	825.735	0.798409	0.199045	4.0112	6.04116e-05	0.00172253
FBgn0022097	Vha36-1	3878.1	-0.147916	0.130413	-1.13421	0.256707	0.581114	esterase
FBgn0022153	l(2)k05819	1847.94	-0.0837793	0.117155	-0.715114	0.474539	0.761834
FBgn0022160	Gpo1	7211.85	-0.146714	0.333243	-0.440261	0.659748	0.872649
FBgn0022213	Cse1	826.341	0.197715	0.118455	1.66911	0.095096	0.350768
FBgn0022224	ubl	247.253	-0.15854	0.213205	-0.743604	0.457116	0.748205
FBgn0022238	lolal	2990.78	-0.278753	0.136498	-2.04217	0.0411345	0.212819	astrocytic leucine-rich repeat molecule
FBgn0022288	l(2)09851	537.818	0.899812	0.20031	4.49209	7.05281e-06	0.000295364
FBgn0022338	dnk	233.978	0.0528286	0.19847	0.26618	0.790101	0.9306
FBgn0022343	CG3760	1135.91	0.248261	0.121584	2.04189	0.041162	0.212819
FBgn0022344	CG10340	893.876	-0.17394	0.164455	-1.05768	0.290203	0.616396
FBgn0022349	CG1910	2512.12	0.270228	0.109173	2.47522	0.0133154	0.100673
FBgn0022355	Tsf1	86582.5	1.74629	0.370532	4.71293	2.44186e-06	0.000120534
FBgn0022359	Sodh-2	94.2546	0.052077	0.240874	0.216201	0.828831	0.945912
FBgn0022361	Pur-alpha	3354.02	0.0111923	0.188235	0.0594589	0.952587	0.985952
FBgn0022382	Pka-R2	3864.85	-0.124481	0.128841	-0.966161	0.333963	0.654437
FBgn0022699	D19B	856.686	-0.0646915	0.156328	-0.41382	0.679006	0.879668
FBgn0022700	Cht4	0.655109	1.67378	3.31091	0.505536	0.613183	NA
FBgn0022702	Cht2	446.079	-0.860599	0.355026	-2.42404	0.0153488	0.11111
FBgn0022709	Adk1	2000.08	-0.546952	0.198114	-2.76079	0.0057661	0.0557927
FBgn0022710	Ac13E	2731.27	0.145969	0.133602	1.09257	0.274583	0.600899
FBgn0022724	Taf8	149.924	0.250658	0.231353	1.08344	0.278612	0.605558
FBgn0022740	HLH54F	1.10301	0.866901	2.35198	0.368583	0.712438	NA
FBgn0022764	Sin3A	6862.2	0.220389	0.150144	1.46785	0.142144	0.435405
FBgn0022768	Pp2C1	1904.46	0.0560761	0.137588	0.407565	0.683593	0.880957
FBgn0022770	Peritrophin-A	146.367	-1.28993	0.534969	-2.41122	0.0158993	0.113335
FBgn0022772	Orc1	45.0284	0.259899	0.409975	0.63394	0.52612	0.796257
FBgn0022774	Oat	1730.96	0.745412	0.23411	3.18402	0.00145243	0.0214483
FBgn0022786	Hira	351.356	0.0772968	0.141371	0.546765	0.58454	0.827901
FBgn0022787	Hel89B	3454.47	-0.100561	0.131314	-0.765804	0.443793	0.739149	peptidase
FBgn0022800	Cad96Ca	738.652	-0.269295	0.151044	-1.7829	0.074603	0.30216
FBgn0022893	Df31	1953.34	-0.159161	0.181326	-0.877762	0.380073	0.690342
FBgn0022935	D19A	898.502	-0.034121	0.155239	-0.219797	0.82603	0.944506
FBgn0022936	CycH	167.299	0.0622146	0.188535	0.329989	0.741408	0.909262
FBgn0022942	Cbp80	1210.17	0.175889	0.112941	1.55736	0.119384	0.396383
FBgn0022943	Cbp20	339.327	-0.169834	0.161373	-1.05243	0.292604	0.618891
FBgn0022959	yps	9290.7	0.285626	0.251954	1.13364	0.256944	0.581281
FBgn0022960	vimar	606.372	-0.0574805	0.134638	-0.426926	0.669433	0.877756
FBgn0022984	qkr58E-3	1594.22	-0.170008	0.138081	-1.23122	0.21824	0.540321
FBgn0022985	qkr58E-2	1456.81	-0.0569989	0.11074	-0.514708	0.606757	0.841641
FBgn0022986	qkr58E-1	1203.35	-0.200879	0.134231	-1.49652	0.134519	0.422535
FBgn0022987	qkr54B	1940.04	-0.145446	0.114284	-1.27267	0.203134	0.52391	apterous
FBgn0023000	mth	483.663	0.194346	0.160063	1.21418	0.224677	0.548944
FBgn0023001	melt	253.658	-0.410852	0.208862	-1.9671	0.049172	0.235485
FBgn0023023	CRMP	3955.67	0.305129	0.0970861	3.14287	0.001673	0.0236315
FBgn0023076	Clk	876.897	0.317614	0.126917	2.50252	0.0123312	0.0953155
FBgn0023081	gek	2749.28	-0.029499	0.134041	-0.220075	0.825812	0.944506
FBgn0023083	fray	2289.94	-0.0632834	0.116239	-0.544426	0.586148	0.82842
FBgn0023090	dtr	7.11804	-0.139888	0.872574	-0.160316	0.872632	0.957858
FBgn0023091	dimm	26.7212	-0.113051	0.441352	-0.256147	0.797838	0.934209
FBgn0023094	cyc	905.387	0.220515	0.14327	1.53916	0.123766	0.404787
FBgn0023095	caps	2596.05	-0.256572	0.114505	-2.2407	0.0250456	0.154053	Anaphase Promoting Complex subunit 7
FBgn0023096	btv	177.015	0.568605	0.304628	1.86656	0.0619633	0.270594
FBgn0023097	bon	1943.4	0.0708691	0.150646	0.470435	0.638044	0.862936
FBgn0023129	aay	7293.71	-1.0764	0.26782	-4.01911	5.84193e-05	0.00169037
FBgn0023130	a6	401.949	-0.204411	0.140385	-1.45607	0.145372	0.440513
FBgn0023143	Uba1	6341.66	0.0891262	0.0977814	0.911484	0.362041	0.676208
FBgn0023167	SmD3	411.898	0.00569208	0.148338	0.0383723	0.969391	0.990235
FBgn0023169	AMPKalpha	5613.7	-0.240009	0.0919627	-2.60985	0.00905821	0.0768299
FBgn0023170	RpL39	11958.8	0.675389	0.217191	3.10966	0.00187304	0.0257117
FBgn0023171	rnh1	305.05	0.226464	0.145761	1.55366	0.120265	0.397705	Apolipophorin - carrie GPI anchors
FBgn0023172	RhoGEF2	5046.37	0.101535	0.1082	0.938401	0.348039	0.666307
FBgn0023174	Prosbeta2	1626.88	-0.186025	0.170482	-1.09117	0.275198	0.602
FBgn0023175	Prosalpha7	1526.85	-0.20662	0.167467	-1.23379	0.21728	0.539726	Apolipoprotein lipid transfer particle
FBgn0023177	Pp4-19C	732.661	-0.0189515	0.131049	-0.144614	0.885015	0.961322
FBgn0023178	Pdf	864.652	-0.0728753	0.172115	-0.42341	0.671996	0.878472
FBgn0023179	amon	6160.58	-0.119676	0.119259	-1.0035	0.315619	0.640441	Argininosuccinate lyase
FBgn0023180	Orc6	36.0963	0.0110181	0.377289	0.0292034	0.976702	0.99203
FBgn0023181	Orc4	182.56	-0.15258	0.173478	-0.879536	0.379111	0.689422
FBgn0023197	Jon74E	9.68201	0.614205	0.72247	0.850146	0.395244	0.701906
FBgn0023212	EloB	2826.79	0.0658136	0.125651	0.52378	0.600432	0.836543
FBgn0023213	eIF4G1	8839.67	0.568562	0.138839	4.09512	4.21957e-05	0.00132275
FBgn0023214	edl	188.624	-0.0302628	0.235776	-0.128354	0.897869	0.967504	Asparagine synthase
FBgn0023215	Mnt	2358.62	0.140492	0.161626	0.869244	0.384714	0.694357
FBgn0023216	Parg	396.695	-0.0512115	0.137626	-0.372108	0.709813	0.893705
FBgn0023388	Dap160	4434.28	-0.234856	0.143311	-1.63879	0.101257	0.362461
FBgn0023395	Chd3	5.86194	0.986955	1.03293	0.955495	0.339327	0.658448
FBgn0023407	B4	3110.5	0.114441	0.157698	0.725698	0.468024	0.757808
FBgn0023415	Acp32CD	1.31221	0.251757	1.61155	0.156221	0.875859	NA
FBgn0023416	Ac3	3485.18	0.112237	0.167135	0.671537	0.501879	0.780482
FBgn0023441	fus	3544.45	0.400046	0.1109	3.60726	0.000309444	0.00662185
FBgn0023458	Rbcn-3A	8308.01	0.0516915	0.211342	0.244587	0.806777	0.938705
FBgn0023477	Taldo	6596.27	0.162824	0.275105	0.591863	0.553943	0.811314
FBgn0023479	teq	29225.7	0.89125	0.128269	6.94829	3.69744e-12	1.04316e-09
FBgn0023489	Pph13	1008.3	-0.235825	0.153123	-1.5401	0.123535	0.404155
FBgn0023495	Lip3	15.8081	-1.11296	0.964151	-1.15434	0.248359	0.572615
FBgn0023496	Lip1	10.1836	0.741928	0.725629	1.02246	0.306562	0.632414
FBgn0023506	Es2	369.297	-0.0981508	0.156193	-0.628393	0.529746	0.799467
FBgn0023507	D2hgdh	5574.84	0.410049	0.292578	1.40151	0.161063	0.46476
FBgn0023508	Ocrl	2079.15	-0.227186	0.109588	-2.07309	0.0381635	0.20427
FBgn0023509	mip130	762.648	0.0280945	0.135452	0.207414	0.835687	0.947683
FBgn0023510	Rbcn-3B	3369.03	-0.0514963	0.150687	-0.341743	0.732545	0.905622
FBgn0023511	Edem1	1833.41	0.021791	0.159989	0.136203	0.891661	0.963676	Argininosuccinate synthase
FBgn0023512	eIF2Bepsilon	727.945	-0.0350291	0.239613	-0.146191	0.883771	0.960949	Allatostatin A receptor 2
FBgn0023513	CG14803	278.748	-0.184611	0.208723	-0.884478	0.376438	0.687412	leucine rich - cilia
FBgn0023514	CG14805	783.307	0.31534	0.139612	2.25869	0.0239027	0.149336
FBgn0023515	CG14814	92.2678	0.0814777	0.241041	0.338024	0.735345	0.906733
FBgn0023516	Pex5	1457	-0.0914363	0.150734	-0.606607	0.544112	0.807001	aspartate 1-decarboxylase
FBgn0023517	Pgam5	338.606	-0.0887188	0.160252	-0.553621	0.579839	0.825119
FBgn0023518	trr	1619.51	0.0113358	0.174189	0.0650777	0.948112	0.984812
FBgn0023519	mRpL16	340.247	-0.0197534	0.158845	-0.124357	0.901033	0.969196
FBgn0023520	CG3857	158.889	0.276968	0.224037	1.23626	0.216362	0.538892
FBgn0023521	CG3587	189.423	0.1534	0.253648	0.604773	0.54533	0.807001
FBgn0023522	CG11596	631.063	0.224169	0.14683	1.52672	0.12683	0.409315
FBgn0023523	Or2a	6.56984	-0.261483	0.778974	-0.335676	0.737115	0.907652
FBgn0023524	CG3078	1600.77	-0.0705917	0.152626	-0.462513	0.643713	0.865437	beta-mannosidase activity - lysosome
FBgn0023525	CG3191	664.13	-0.291326	0.138729	-2.09997	0.0357318	0.195649
FBgn0023526	CG2865	860.326	0.00296807	0.183284	0.0161938	0.98708	0.994881
FBgn0023527	CG3071	602.74	0.989482	0.167719	5.89964	3.64302e-09	4.29195e-07
FBgn0023528	CG2924	1987.62	-0.196707	0.125736	-1.56444	0.117714	0.392774
FBgn0023529	CG2918	5112.41	0.582663	0.131608	4.42726	9.54397e-06	0.000383224
FBgn0023530	CG3740	304.6	-0.489	0.18424	-2.65415	0.00795081	0.0702147	mito transporter
FBgn0023531	CG32809	5804.99	-0.0984744	0.161007	-0.611615	0.540792	0.805367
FBgn0023534	CG17778	531.065	-0.013585	0.181627	-0.0747957	0.940377	0.983685
FBgn0023535	arg	43.7281	-0.243924	0.45775	-0.532876	0.59412	0.833057
FBgn0023536	CG3156	315.778	0.130122	0.177885	0.731495	0.464477	0.755447
FBgn0023537	CG17896	5961.21	0.434663	0.144111	3.01616	0.00255994	0.0319794
FBgn0023540	CG3630	971.809	-0.460986	0.375231	-1.22854	0.219245	0.541097
FBgn0023542	Nmd3	1217.49	0.586087	0.166265	3.52501	0.000423466	0.00854986
FBgn0023545	PIG-K	786.116	-0.154116	0.184958	-0.833247	0.404705	0.710016
FBgn0023549	Mct1	1010.68	0.00545015	0.160551	0.0339465	0.97292	0.990782
FBgn0023550	FarO	249.624	0.285196	0.215023	1.32635	0.184724	0.498711
FBgn0024150	Ac78C	742.465	-0.184147	0.185417	-0.993153	0.320635	0.645357
FBgn0024179	wit	1908.3	-0.152624	0.11563	-1.31994	0.186857	0.502107
FBgn0024183	vig	6211.76	0.197107	0.115309	1.70938	0.0873814	0.333981
FBgn0024184	unc-4	62.611	0.17712	0.291748	0.607099	0.543785	0.807001
FBgn0024187	syd	3494.09	0.00602022	0.130693	0.0460638	0.963259	0.989471
FBgn0024188	san	606.814	0.197039	0.132742	1.48437	0.13771	0.427568
FBgn0024189	sns	1807.45	-0.0174335	0.163273	-0.106775	0.914968	0.974699
FBgn0024191	sip1	228.468	-0.0795317	0.180799	-0.439889	0.660017	0.872649
FBgn0024194	rasp	151.708	-0.37433	0.201634	-1.85649	0.0633844	0.273789
FBgn0024196	robl	904.754	-0.314948	0.149017	-2.1135	0.0345582	0.192207
FBgn0024222	IKKbeta	467.445	0.281282	0.232951	1.20748	0.227249	0.551083	neuropeptide - diuretic
FBgn0024227	aurB	29.1947	0.00855596	0.401137	0.0213293	0.982983	0.994116
FBgn0024230	Hs2st	761.183	0.164484	0.173325	0.948992	0.342624	0.660424
FBgn0024232	gprs	2546	-0.182072	0.200622	-0.907538	0.364123	0.67856
FBgn0024234	gbb	1200.18	0.106728	0.150529	0.709019	0.478313	0.765029	Cystathionine β-synthase
FBgn0024236	foi	2204.56	0.230396	0.112451	2.04886	0.0404757	0.211206
FBgn0024238	Fim	3494.99	-0.0425004	0.120577	-0.352476	0.724482	0.901336
FBgn0024244	drm	327.088	-0.0493446	0.214268	-0.230294	0.817863	0.941232
FBgn0024245	dnt	306.683	0.0565112	0.155673	0.363012	0.716596	0.897713
FBgn0024248	chico	1919.59	0.154324	0.138554	1.11382	0.265357	0.591319
FBgn0024250	brk	386.14	0.222742	0.144548	1.54096	0.123327	0.40397
FBgn0024251	bbx	21.0636	0.282369	0.522509	0.540409	0.588915	0.830049
FBgn0024273	WASp	1284.64	-0.199719	0.127449	-1.56706	0.117101	0.39159	phenoxazinone synthetase
FBgn0024277	trio	8054.15	0.0146642	0.155042	0.0945822	0.924647	0.9782
FBgn0024285	Srp54	1274.1	0.0319883	0.131754	0.242789	0.808169	0.939467
FBgn0024288	Sox100B	11.9948	0.0537586	0.645515	0.0832802	0.933629	0.981125
FBgn0024289	Sodh-1	2316.48	1.29436	0.358005	3.61547	0.000299798	0.00649321
FBgn0024291	Sirt1	2156.29	0.0354932	0.13642	0.260177	0.794727	0.93278
FBgn0024293	Spn43Ab	8782.22	0.257013	0.187824	1.36837	0.171196	0.481332
FBgn0024294	Spn43Aa	11.7815	-2.0625	1.08881	-1.89427	0.0581898	0.260155
FBgn0024314	Plap	903.091	-0.260791	0.200117	-1.3032	0.192508	0.508132
FBgn0024315	Picot	4107.69	0.397171	0.192017	2.06842	0.0386009	0.205482	Ceramidase
FBgn0024319	Nach	0.49374	0.993017	3.58303	0.277145	0.781669	NA
FBgn0024320	Npc1a	5725.43	0.185768	0.127507	1.45692	0.145137	0.440299
FBgn0024321	NK7.1	2306.76	-0.264105	0.13516	-1.95402	0.0506987	0.240292
FBgn0024326	Mkk4	1905.37	0.0707126	0.113802	0.621363	0.534361	0.802834
FBgn0024329	Mekk1	2020.69	-0.131406	0.136863	-0.960124	0.336993	0.656891
FBgn0024330	MED6	373.321	-0.277472	0.145686	-1.90458	0.0568341	0.256548
FBgn0024352	Stip1	2083.75	-0.062557	0.259319	-0.241236	0.809372	0.93953
FBgn0024360	MTPAP	296.838	0.0617303	0.153134	0.403112	0.686866	0.882114
FBgn0024361	Tsp2A	31.2145	-0.557028	0.381767	-1.45908	0.144543	0.439999
FBgn0024362	Naa30A	1104.94	-0.145097	0.115831	-1.25267	0.210327	0.532699
FBgn0024364	CG11417	407.174	0.704523	0.214591	3.28309	0.00102676	0.0165532
FBgn0024365	CG12773	1426.28	0.0155733	0.185549	0.0839311	0.933111	0.981125
FBgn0024366	CG11409	80.5732	-0.436158	0.512641	-0.850806	0.394877	0.701755
FBgn0024371	E2f2	410.437	0.379162	0.144442	2.62501	0.00866476	0.0743754
FBgn0024432	Dlc90F	1289.82	-0.533355	0.136967	-3.89404	9.85879e-05	0.00261624
FBgn0024491	Bin1	348.455	-1.06307	0.28315	-3.75446	0.000173718	0.00413874
FBgn0024509	Sec13	1561.63	0.216652	0.153623	1.41028	0.158456	0.460132
FBgn0024510	dlt	244.236	-0.0401223	0.160508	-0.24997	0.80261	0.936015
FBgn0024542	Neos	206.692	-0.00872462	0.194159	-0.0449355	0.964159	0.98968
FBgn0024555	flfl	3976.93	0.142718	0.104717	1.36289	0.172918	0.48265	lipid binding
FBgn0024556	mEFTu1	2273.28	0.155327	0.131711	1.1793	0.238278	0.562056	ER metalloprotease
FBgn0024558	Dph5	478.882	0.623807	0.194033	3.21495	0.00130465	0.0199511
FBgn0024689	fws	1207.82	0.11988	0.11003	1.08952	0.275924	0.60285
FBgn0024698	Cpsf160	551.044	0.209143	0.128976	1.62156	0.104897	0.370056
FBgn0024728	Slip1	2737.4	-0.0946896	0.127521	-0.742539	0.457761	0.74846
FBgn0024732	Drep1	854.209	-0.143576	0.120218	-1.1943	0.23236	0.555134
FBgn0024733	RpL10	36102.9	0.717868	0.218263	3.28901	0.00100541	0.0163567
FBgn0024734	PRL-1	371.674	0.519101	0.216765	2.39477	0.0166309	0.116971
FBgn0024740	Lip2	83.7	0.940687	0.468803	2.00657	0.0447951	0.223664
FBgn0024754	Flo1	2172.8	-0.026619	0.110036	-0.241911	0.808849	0.93953
FBgn0024804	Dbp80	2101.28	0.1694	0.131345	1.28973	0.197144	0.514503
FBgn0024806	DIP2	3708.44	0.0877996	0.126299	0.695173	0.486947	0.769298	ER metalloprotease
FBgn0024807	DIP1	26625.7	-0.0844782	0.099461	-0.849361	0.395681	0.702054	ribosome/unfolded protein binding
FBgn0024811	Crk	1940.33	-0.149181	0.13229	-1.12768	0.259453	0.583831
FBgn0024814	Clc	2922.25	-0.236498	0.120946	-1.95541	0.0505349	0.239834
FBgn0024833	AP-1mu	1528.96	-0.171988	0.11039	-1.55801	0.11923	0.396239
FBgn0024836	stan	1833.34	0.0711908	0.214228	0.332314	0.739652	0.908886
FBgn0024841	Pcd	997.022	0.00992635	0.137944	0.0719594	0.942634	0.984113
FBgn0024846	p38b	734.311	-0.227164	0.150666	-1.50773	0.131624	0.417743
FBgn0024887	kin17	387.685	-0.161928	0.165283	-0.979696	0.327236	0.64994	ribosome
FBgn0024889	Kap-alpha1	2347.45	0.115713	0.140738	0.822191	0.410968	0.716663
FBgn0024897	b6	87.434	-0.180977	0.414417	-0.436702	0.662327	0.874053
FBgn0024909	Taf7	216.115	-0.0949694	0.263294	-0.360698	0.718325	0.8982
FBgn0024912	agt	171.31	0.035582	0.254938	0.139572	0.888999	0.962917	protein-cysteine S-palmitoyltransferase activity
FBgn0024913	Actbeta	1597.64	-0.163177	0.129569	-1.25939	0.20789	0.530177	Glycine C-acetyltransferase
FBgn0024920	Ts	24.7101	0.748491	0.973583	0.768801	0.442012	0.738592
FBgn0024921	Tnpo	2421.43	-0.0210572	0.129453	-0.162662	0.870784	0.957702
FBgn0024941	RSG7	1824.66	-0.0608178	0.159813	-0.380556	0.703533	0.889875
FBgn0024943	PIP82	10064.4	-0.460632	0.148623	-3.09934	0.00193952	0.0263879
FBgn0024944	Oamb	1388.05	-0.265211	0.18294	-1.44971	0.147138	0.442736
FBgn0024945	NitFhit	1004.12	-0.184222	0.161112	-1.14344	0.252856	0.57764
FBgn0024947	NTPase	2852.15	0.229449	0.119373	1.92211	0.0545913	0.249797
FBgn0024956	Mat1	373.147	-0.0818552	0.210965	-0.388003	0.698014	0.887231
FBgn0024957	Irp-1B	7143.86	1.02125	0.256061	3.98831	6.65467e-05	0.00186278
FBgn0024958	Irp-1A	1521.99	-0.111068	0.137586	-0.807261	0.419516	0.722628
FBgn0024963	GluClalpha	9170.37	0.0200366	0.115679	0.173209	0.862487	0.954515
FBgn0024973	CG2701	1027.17	-0.163991	0.147835	-1.10929	0.267306	0.593208
FBgn0024975	CG2712	123.564	0.0874049	0.232366	0.376152	0.706804	0.892039
FBgn0024980	Syx4	767.838	-0.171028	0.143633	-1.19073	0.23376	0.556672
FBgn0024983	CG4293	487.974	0.288716	0.162595	1.77567	0.0757866	0.305339
FBgn0024984	CG3457	0.335871	-1.74873	4.02989	-0.43394	0.664332	NA
FBgn0024985	Rilpl	4106.32	-0.213355	0.108229	-1.97134	0.0486854	0.234504
FBgn0024986	CG3719	1034.26	-0.443724	0.159382	-2.78403	0.00536886	0.0530014
FBgn0024987	ssx	3413.92	-0.0153167	0.122503	-0.125031	0.900499	0.968903
FBgn0024989	CG3777	108.622	-1.79559	1.01052	-1.7769	0.0755839	0.304673	Ecdysteroid kinase-like
FBgn0024991	CG2694	157.144	0.0881544	0.240339	0.366792	0.713774	0.895996
FBgn0024992	Spg7	1049.17	0.0526663	0.13154	0.400383	0.688875	0.88353
FBgn0024993	CG2662	100.982	-0.0504779	0.232845	-0.216788	0.828374	0.945591
FBgn0024994	Ugalt	371.508	0.190379	0.157715	1.20711	0.227391	0.551179
FBgn0024995	CG2680	476.467	0.0700002	0.161437	0.433607	0.664574	0.874927
FBgn0024996	eIF2Bbeta	889.415	-0.0396879	0.136642	-0.290452	0.77147	0.922188
FBgn0024997	CG2681	708.328	-0.0836146	0.188499	-0.44358	0.657346	0.87115
FBgn0024998	CG2685	424.477	0.10413	0.153999	0.676173	0.498931	0.777811
FBgn0025109	Bem46	296.898	-0.107145	0.194756	-0.550149	0.582217	0.82653	peptidase
FBgn0025111	Ant2	124.845	-0.833163	0.292635	-2.8471	0.0044119	0.0465551
FBgn0025185	az2	223.42	0.0390324	0.179036	0.218014	0.827418	0.945105
FBgn0025186	ari-2	1098.23	-0.222875	0.130077	-1.71342	0.0866356	0.331959
FBgn0025334	PHDP	15.8999	-0.46662	0.510981	-0.913185	0.361145	0.67536
FBgn0025335	Cpes	869.021	0.033774	0.128106	0.263641	0.792057	0.931668
FBgn0025336	CG4882	646.388	-0.0194466	0.125681	-0.154729	0.877035	0.959104
FBgn0025352	Thiolase	7927.14	-0.0205733	0.138724	-0.148304	0.882103	0.960508
FBgn0025360	Optix	821.616	0.164133	0.118253	1.38798	0.165142	0.470636
FBgn0025366	Ip259	4506.09	0.231512	0.196001	1.18117	0.237533	0.561827
FBgn0025373	Fpps	542.278	-0.341084	0.19573	-1.74262	0.0813992	0.320367
FBgn0025378	CG3795	0.967883	-0.746435	2.165	-0.344774	0.730264	NA
FBgn0025381	rush	2211.87	-0.210514	0.1418	-1.48459	0.137653	0.427514
FBgn0025382	Rab27	357.839	-0.45304	0.169519	-2.6725	0.00752892	0.0674433
FBgn0025383	CG14780	4.05732	-0.152956	1.01647	-0.150478	0.880388	NA
FBgn0025387	CG12184	42.9793	-0.270694	0.333871	-0.810774	0.417495	0.721317
[truncated: 12,030 more rows]
